# Supplementary material for: Distinct Cutibacterium acnes subspecies defendens strains classified by multi-omics dissection alleviate inflammatory skin lesions of a rosacea-like mouse model
Source: Front Microbiomes. 2024 Oct 21;3:1362408. doi: 10.3389/frmbi.2024.1362408 (PMC12993555; doi:10.3389/frmbi.2024.1362408)
Supplement: Supplementary file 10 [file DataSheet5.xlsx]

## Sheet: Table S5
Table S5. Gene expression profiles of anti-inflammatory and non-immunosuppressive C. acnes type II strains.
Scaffolds (CJRS-10653)	Begin (CJRS-10653)	End (CJRS-10653)	Product	Locus tag (CJRS-10653)	TPM (FADU)
					CJRS-10653 (1)	CJRS-10653 (2)	CJRS-10653 (3)	CJRS-10655 (1)	CJRS-10655 (2)	CJIN-2-13 (1)	CJIN-2-13 (2)	KCTC3320	KPA171202 (1)	KPA171202 (1)	KCTC3314
C11_37.0	89	2062	thrombospondin type 3 repeat-containing protein	1	466.07	494.59	458.83	542.75	548.95	385.11	403	270.42	605.94	700.42	559.9
C11_37.0	2085	2324	hypothetical protein	2	965.96	977.43	956.04	1807.77	1626.01	416.63	481.78	409.74	890.74	1029.06	3448.32
C11_37.0	2254	2531	hypothetical protein	3	431.78	404.33	406.33	838.21	729.46	269.18	257.36	306.93	799.72	1076.18	5833.28
C21_19.0	106	1131	adenosine deaminase	7	504.87	494.02	506.02	199.91	187.24	119.5	116.01	408.23	547.36	595.2	279.62
C21_19.0	1372	2658	citrate synthase	8	512.04	374.68	496.69	305.58	265.69	298.85	274.78	189.41	244.65	210.31	125.17
C21_19.0	2952	4454	septal ring lytic transglycosylase RlpA family protein	9	10243.4	6092.06	9385.11	8695.8	6878.17	999.2	1251.72	207.63	619.8	596.56	219.32
C21_19.0	4695	5849	L,D-transpeptidase family protein	10	505.19	538.75	551.89	323.58	347.14	411.98	362.73	189.6	716.88	631.53	146.02
C21_19.0	6130	6261	acyltransferase	11	151.02	240.92	196.62	97.55	128.37	583.35	529.5	278.52	634.26	537.66	37.98
C21_19.0	6263	6512	hypothetical protein	12	117.12	166.14	125.9	55.12	53.38	334.04	258.69	258.55	78.46	70.85	11.95
C21_19.0	6594	6886	hypothetical protein	13	108.6	154.52	119.97	43.34	35.71	111.4	85.46	94.95	242.93	179.31	45.64
C21_19.0	7259	8758	amino acid permease	14	120.25	163.54	135.81	58.8	59.88	84.26	80.6	65.53	100.35	63.01	14.61
C25_17.0	8	574	adhesin	15	251.25	322.11	264.62	185.97	175.2	750.69	738.17	241.38	663.13	520.02	66.54
C25_17.0	771	1036	hypothetical protein	16	1514.92	1334.47	1503.07	947.24	1126.1	1941.86	1900.42	833.08	997.44	1010.44	135.53
C25_17.0	1436	2269	lysozyme	17	4288.16	4161.23	3979.05	4001.61	4386.73	3845.17	3867.87	2689.48	1014.66	1292.79	378.06
C25_17.0	2521	2655	3'-5'-bisphosphate nucleotidase	18	281.81	400.46	321.47	312.9	317.05	785.31	829.28	189.83	997.75	1196.81	189.04
C25_17.0	2868	3353	thioredoxin-dependent thiol peroxidase	20	741.53	860.89	705.06	772.38	812.26	938.33	972.49	788.96	810.91	782.23	748.23
C25_17.0	3437	4003	DUF3618 domain-containing protein	21	566.51	449.4	487.67	440.72	518.71	1087.26	1013.5	1252.14	953.54	1181.17	1691.63
C25_17.0	4077	4883	carbohydrate ABC transporter permease	22	49.13	42.7	40.98	29.85	40.62	166.67	155.23	251.09	438.45	554.05	193.04
C25_17.0	4880	5920	sugar ABC transporter permease	23	45.71	36.74	36.34	26.98	30.69	119.28	103.56	74.66	148.67	176.33	50.43
C25_17.0	6030	7343	ABC transporter substrate-binding protein	24	211.89	165.72	204.82	145.54	146.97	362.55	381.85	81.84	172.65	190.4	85.72
C25_17.0	7864	8592	glutamine amidotransferase	26	116.47	112.67	124.39	110.19	104.86	212.61	203.8	201.85	358.99	284.71	101.99
C25_17.0	8589	9743	DUF1727 domain-containing protein	27	130.71	135.51	134.49	121.26	122.49	178.2	168.91	214.81	377.97	272.92	139.68
C25_17.0	10076	10672	hypothetical protein	28	49.02	70.43	55.66	142.73	142.54	134.61	147.18	744.84	688.9	491.89	493.87
C25_17.0	10662	12254	DNA polymerase Y family protein	29	37.49	42.43	39.79	78.73	78.41	56.75	50.76	533.88	423.94	289.82	248.42
C25_17.0	12296	12448	2OG-Fe(II) oxygenase	30	14.12	16.92	17.03	36.53	23.51	33.63	32.63	357.56	641.17	532.79	120.08
C25_17.0	12422	15664	error-prone DNA polymerase	31	32.79	52.16	35.69	47.88	49.13	77.52	74.87	293.59	237.11	175.08	86.7
C5_34.0	41	1153	alanine dehydrogenase	32	973.61	785.81	1086.9	933.5	1174.01	310.83	382.06	512.91	472.07	531.94	327.26
scaffold1_16.5	1	340	2-oxoglutarate dehydrogenase, E2 component, dihydrolipoamide succinyltransferase	33	34.39	22.75	28.86	695.01	687.81	16.77	15.01	42.87	717.71	726	139.14
scaffold1_16.5	555	2081	leucyl aminopeptidase	34	536.5	466.64	559.05	563.87	575.49	494.38	482.91	656.23	610.9	662.56	669.25
scaffold1_16.5	2117	2596	hypothetical protein	35	299.17	397.59	308.7	329.38	431.58	210.49	203.57	416.49	517.96	525.06	390.02
scaffold1_16.5	2566	2784	hypothetical protein	36	358.71	553.56	362.1	472.57	643.26	460.53	454.89	532.94	864.67	873.67	534.77
scaffold1_16.5	2828	3583	DUF3043 domain-containing protein	37	156.76	126.66	151.71	152.68	169.87	132.3	120.65	258.51	532.78	462.57	162.79
scaffold1_16.5	3782	4582	PspA/IM30 family protein	38	425.05	376.55	440.3	355.03	404.64	973.2	905.79	887.76	969.15	1100.78	952.58
scaffold1_16.5	4579	4869	hypothetical protein	39	399.75	331.88	423.9	356.24	291.07	720.17	554.01	745.5	904.68	1057.48	816.81
scaffold1_16.5	5040	5393	iron-sulfur cluster insertion protein ErpA	40	1377.62	1339.07	1362.25	1329.33	1273.46	1834.26	1909.83	1431.02	868.85	1023.46	1180.98
scaffold1_16.5	5769	6482	cytochrome c oxidase subunit II	41	729.58	618.2	675.17	554.95	579.32	845.76	775.18	666.66	530.61	539.85	574.1
scaffold1_16.5	6479	8197	cytochrome c oxidase subunit I	42	686.02	649.24	693	582.22	565.39	382.83	343.43	550.2	323.2	315.43	484.47
scaffold1_16.5	8197	8592	cytochrome c oxidase subunit 4	43	496.58	438.07	465.1	509.21	400.92	338.51	267.6	636.05	373.08	386.64	666.92
scaffold1_16.5	8648	11086	hypothetical protein	44	111.15	108.44	111.25	86.85	79.71	87.38	89.32	134.06	260.09	249.85	97.57
scaffold1_16.5	11083	11757	ABC transporter ATP-binding protein	45	92.56	83.05	90.61	50.12	50.46	183.27	190.88	91.68	151.27	104.86	53.88
scaffold1_16.5	11831	12160	peptidase inhibitor family I36 protein	46	220.36	213.75	218.46	186.35	164.86	956.89	1005.51	79.33	331.04	355.18	427.3
scaffold1_16.5	13109	13765	NAD(P)H-binding protein	47	854.03	825.69	837.15	726.93	812.18	640.04	659.74	303.25	606.7	459.37	141.56
scaffold1_16.5	13830	15311	GuaB1 family IMP dehydrogenase-related protein	48	976.59	987.49	926.73	956.72	1002.51	1329.88	1344.47	443.74	590.18	473.82	95.83
scaffold1_16.5	15350	15667	MGMT family protein	49	252.95	250.34	254.71	261.89	351.84	157.88	142.27	207.23	612.08	707.66	143.13
scaffold1_16.5	15716	17395	cytochrome bc complex cytochrome b subunit	50	421.43	456.72	433.1	304.33	347.04	154.05	164.46	148.8	423.07	378.16	161.33
scaffold1_16.5	17395	18477	Rieske (2Fe-2S) protein	51	480.6	543.17	471.1	422.02	448.85	513.07	515.52	281.49	513.78	442.61	181
scaffold1_16.5	18444	19247	c-type cytochrome	52	439.04	424.33	426.62	364.86	402.05	204.56	181.6	299.22	590.37	556.08	223.07
scaffold1_16.5	19279	19872	heme-copper oxidase subunit III	53	585.26	464.25	556.88	424.22	405.2	500.3	417.94	345.23	557.32	390.67	216.37
scaffold1_16.5	20159	20668	response regulator transcription factor	54	577.44	608.85	583.7	623.8	571.82	883.15	868.85	1003.52	885.1	1092.41	1326.84
scaffold1_16.5	20779	20946	anthranilate phosphoribosyltransferase	55	254.41	224.24	249.02	264.71	280.51	193.53	200.72	410.74	907.14	1055.81	322.9
scaffold1_16.5	20933	21643	leader peptidase (prepilin peptidase)/N-methyltransferase	56	93.13	84.29	92.7	100.62	90.9	73.63	71.07	269.43	503.34	575.42	214.32
scaffold1_16.5	21653	22132	hypothetical protein	57	51.5	48.62	52.03	42.74	44.42	67.22	59.95	255.68	297.13	262.69	126.54
scaffold1_16.5	22438	23508	DUF5324 family protein	58	2574.18	1942.61	2481.75	3121.48	3212.26	5291.43	6946.55	243.78	994.41	1160.16	508.36
scaffold1_16.5	23691	24203	peptidylprolyl isomerase	59	1888.78	1486.98	1782.71	1382.08	1288.64	2724.09	2804.74	881.38	1032.48	1143.15	1060.28
scaffold1_16.5	24387	24965	rhomboid family intramembrane serine protease	60	340.27	307.98	356.25	314.86	314.36	582.53	494.79	561.62	967.79	1010.55	798.17
scaffold1_16.5	24885	26786	DEDD exonuclease domain-containing protein	61	71.78	114.32	88.27	95.67	115.12	136.78	129.46	205.31	524.69	520.24	244.57
scaffold1_16.5	27039	28094	C40 family peptidase	62	470.07	933.72	691.16	836.37	882.11	1496.6	1460.58	2092.76	998.91	1275.12	3331.73
scaffold1_16.5	28101	29171	ROK family glucokinase	63	332.16	738.01	473.43	597.68	582.98	536.14	499.77	1347.07	854.8	1085.81	2077.6
scaffold1_16.5	29176	29583	hypothetical protein	64	213.42	357.67	248.63	320.69	311.02	293.03	259.63	671.68	744.34	912.94	880.71
scaffold1_16.5	29643	30398	1-acyl-sn-glycerol-3-phosphate acyltransferase	65	403.07	336.93	376.01	317.38	354.91	160.95	171.04	265.52	565.09	457.29	245.04
scaffold1_16.5	30565	31122	1-acyl-sn-glycerol-3-phosphate acyltransferase	66	242.06	230.06	245.96	160.17	167.75	99.55	86.66	183.01	416.09	295.14	105.77
scaffold1_16.5	31196	32614	3-deoxy-7-phosphoheptulonate synthase class II	67	173.75	209.95	184.79	176.69	210.47	354.47	339.64	240.1	576.6	552.4	67.09
scaffold1_16.5	32718	33365	MBL fold metallo-hydrolase	68	358.87	305.74	333.75	314.45	349.32	296.76	301.1	652.86	743.63	524	392.44
scaffold1_16.5	33381	34289	DMT family transporter	69	430.98	358.92	417.91	517.01	484.7	682.99	719.31	477.05	818.99	891.99	154.72
scaffold1_16.5	34387	35805	protein kinase	70	885.96	827.16	880.56	784.32	815.24	740.6	708.64	241.95	559.13	532.13	320.58
scaffold1_16.5	36058	36369	ribonuclease	71	706.71	843.75	714.85	705.42	887.37	475.29	485.78	389.83	671.05	651.02	26.96
scaffold1_16.5	36366	36764	barstar family protein	72	347.09	402.61	338.69	276.5	311.13	211.57	211.33	92.96	548	420.24	42.5
scaffold1_16.5	36789	37886	polyprenyl synthetase family protein	73	226.69	208.63	228.96	191.01	234.35	149.49	149.54	193.92	346.34	320.13	103.49
scaffold1_16.5	38104	38432	methylenetetrahydrofolate reductase	74	125.09	124.67	127.78	142.07	145.21	229.52	186.49	175.55	272.07	289.65	189.12
scaffold1_16.5	38486	40708	AAA family ATPase	75	546.01	647.84	539.09	560.84	665.02	424.04	440.31	320.69	433.44	340.29	304.39
scaffold1_16.5	40794	41960	carotenoid dehydrogenase	76	139.6	118.17	127.56	116.44	128.12	108.52	113.63	95.88	316.5	307.64	129.34
scaffold1_16.5	41946	42739	alpha/beta hydrolase	77	196.34	230.95	191.51	198.83	216.9	335.86	297.27	329.72	496.39	402.48	221.6
scaffold1_16.5	42859	43317	Hsp20/alpha crystallin family protein	78	3086.22	2261.2	2545.71	5645.35	4984.64	1089.14	897.26	488.9	836.33	922.93	534.64
scaffold1_16.5	43390	44760	gluconate transporter	79	324.72	217.39	279.97	511	447.27	166.43	153.13	114.17	269.77	317.43	31.15
scaffold1_16.5	44790	45374	gluconokinase	80	106.66	105.43	105.46	82.67	97.54	94.87	83.37	157.29	285.66	279.39	0
scaffold1_16.5	45484	46191	FadR family transcriptional regulator	81	235.01	284.23	248.58	167.65	167.8	203.05	185.05	181.99	233.55	195.26	4.02
scaffold1_16.5	46361	47089	FadR family transcriptional regulator	82	1321.9	1338.88	1306.87	1031.31	990.86	1655.38	1532.02	374.29	519.4	407.09	807.74
scaffold1_16.5	47146	50136	aminomethyl-transferring glycine dehydrogenase	83	839.84	736.46	880.06	583.66	539.65	416.86	435.66	261.68	656.95	491.15	409.7
scaffold1_16.5	50136	50507	glycine cleavage system protein GcvH	84	845.63	706.62	839.35	726.84	602.3	1200.12	1128.82	172.33	788.08	650.99	238.92
scaffold1_16.5	50547	51662	glycine cleavage system aminomethyltransferase GcvT	85	646.71	596.59	693.84	473.73	487.21	337.43	360.61	205.87	470.26	317.4	256.53
scaffold1_16.5	51789	52217	DUF3040 domain-containing protein	86	945.29	980	891.97	1174.46	1081.36	1008.88	967.13	545.54	787.81	781.42	1943.05
scaffold1_16.5	52244	54457	transglutaminase domain-containing protein	87	290.08	289.23	281.66	273.99	255.11	190.62	191.97	121.92	304.76	301.48	128.6
scaffold1_16.5	54454	55680	DUF58 domain-containing protein	88	211.44	226.39	231.21	183.22	188.81	196.35	187.5	159.43	344.12	411.63	130.49
scaffold1_16.5	55677	56633	AAA family ATPase	89	359.51	353.11	370.95	291.64	325.78	246.29	245.25	144.69	517.94	541.52	137.66
scaffold1_16.5	56996	57424	division/cell wall cluster transcriptional repressor MraZ	90	3922.77	3698.17	3588.67	3371.14	3902.82	6946.16	6971.02	3288.57	1018.43	1371.31	6812.35
scaffold1_16.5	57567	58580	16S rRNA (cytosine(1402)-N(4))-methyltransferase RsmH	91	1379.57	1369.95	1351.94	761.06	691.11	4808.85	4839.63	1063.17	879.79	1082.81	1871.7
scaffold1_16.5	58688	59041	cell division protein FtsL	92	956.97	1000.67	857.07	569.64	560.77	1419.09	1519.31	635.22	824.58	890.87	1026.52
scaffold1_16.5	59176	60963	penicillin-binding protein 2	93	676.51	718.64	661.94	394.14	434.54	761	769.9	510.83	687.41	775.44	785
scaffold1_16.5	61050	62549	UDP-N-acetylmuramoyl-L-alanyl-D-glutamate--2, 6-diaminopimelate ligase	94	578.36	615.97	603.57	441.61	454.09	446.16	438.36	501.09	679.86	768.3	749.91
scaffold1_16.5	62546	64003	UDP-N-acetylmuramoyl-tripeptide--D-alanyl-D- alanine ligase	95	589.86	740.71	597.31	430.03	467.66	678.5	632.69	544.78	636.91	662.03	670.15
scaffold1_16.5	64000	65070	phospho-N-acetylmuramoyl-pentapeptide- transferase	96	709.44	767.67	683.2	366.63	431.69	652.42	623.71	602.01	652.46	657.36	762.56
scaffold1_16.5	65052	66548	UDP-N-acetylmuramoyl-L-alanine--D-glutamate ligase	97	641.59	730.06	652.85	448.73	422.38	735.41	640.73	473.96	597.34	651.54	592.71
scaffold1_16.5	66655	67830	putative lipid II flippase FtsW	98	455.77	562.98	479.13	295.98	280.66	546.19	544.49	657.13	617.92	658.2	741.83
scaffold1_16.5	67873	68991	undecaprenyldiphospho-muramoylpentapeptide beta-N-acetylglucosaminyltransferase	99	326.7	431.44	352.41	243.06	228.62	512.42	520.51	592.81	646.86	662.29	762.97
scaffold1_16.5	69003	70418	UDP-N-acetylmuramate--L-alanine ligase	100	592.32	675.69	603.15	435.72	437.88	533.09	535.93	685.95	750.76	805.05	770.89
scaffold1_16.5	70418	71131	FtsQ-type POTRA domain-containing protein	101	362.53	429.67	348.33	256.51	246.07	604.22	496.57	439.7	674.27	671.18	445.24
scaffold1_16.5	71254	72507	cell division protein FtsZ	102	1390.45	1129.63	1335.29	1581.08	1388.08	881.88	865.04	1094.22	823.22	872.57	1101.72
scaffold1_16.5	72509	73294	laccase domain-containing protein	103	337.32	468.95	375.19	407.17	383.15	317.06	325.12	505.53	460.48	491.3	507.31
scaffold1_16.5	73421	73939	cell division protein SepF	104	2441.86	2439.75	2186.38	2445.69	2734.53	2092.48	2115.31	2031.23	947.84	1110.72	2962.14
scaffold1_16.5	73950	74240	YggT family protein	105	1288.69	1403.31	1247.94	1219.89	1226.41	1585.28	1591.33	1118.8	906.2	1127.44	1261.9
scaffold1_16.5	74392	75477	DivIVA domain-containing protein	106	2759.02	2317.95	2609.38	3012.1	2898.98	2422.2	2599.04	1639.71	1003.53	1259.49	2660.89
scaffold1_16.5	75642	76121	TraR/DksA family transcriptional regulator	107	268.64	234.79	265.85	262.2	223.33	365.02	328.97	401.15	902.89	1001.88	884.35
scaffold1_16.5	76118	76633	signal peptidase II	108	173.25	167.77	202.86	213.3	180.75	151.21	154.23	355.7	818.89	787.42	502.6
scaffold1_16.5	76675	77595	RluA family pseudouridine synthase	109	198.41	238.94	204.82	159.46	162.99	91.58	86.04	214.38	758.25	801.75	367.6
scaffold1_16.5	77713	79146	pyruvate kinase	110	1621.36	1293.88	1559.36	1070.63	930.49	1295.87	1271.63	774.7	923.49	950.64	816.8
scaffold1_16.5	79427	79858	CrcB family protein	111	222.89	244.59	236.84	175.47	163.95	114.1	118.72	210.05	460.74	480.31	279.95
scaffold1_16.5	79855	80226	CrcB family protein	112	90.92	90.21	90.14	68.08	72.7	126.08	133.19	153.94	382.63	517.48	177.03
scaffold1_16.5	80482	81129	response regulator	114	642.16	803.35	681.44	727.53	831.2	2871.26	2788.98	851.31	820.53	873.4	1536.92
scaffold1_16.5	81149	81562	PaaI family thioesterase	115	328.83	401.5	367.14	390.37	400.79	483.16	464.16	339.89	492.58	607.7	403.44
scaffold1_16.5	81634	84312	DNA polymerase I	116	309.17	391.27	311	280.41	368.04	308.33	285.44	364.83	324.54	334.3	496.98
scaffold1_16.5	84475	85083	(Fe-S)-binding protein	117	316.67	293.59	319.31	219.93	210.09	175.22	173.34	182.59	234.48	279.36	205
scaffold1_16.5	85113	87318	FAD-binding oxidoreductase	118	395.6	332.32	395.2	219.99	210.08	156.68	166.19	98.15	110.31	134.72	61.34
scaffold1_16.5	87398	88051	class F sortase	119	443.58	464.99	441.99	236.67	246.17	883.45	862.43	523.19	749.86	737.16	506.87
scaffold1_16.5	88498	89994	30S ribosomal protein S1	120	1585.5	1922.84	1697.27	1592.41	1519.29	1878.06	1817.23	3279.3	1042.51	1344.19	3537.03
scaffold1_16.5	90226	91629	HtaA domain-containing protein	121	29.68	26.49	29.08	25.07	19.46	49.01	35.58	73.05	143.33	84.86	155.72
scaffold1_16.5	92012	92854	ABC transporter substrate-binding protein	122	12.92	15.43	14.43	15.15	15.87	60.91	56.62	57.47	122.56	88.99	69.11
scaffold1_16.5	92851	93909	iron ABC transporter permease	123	51.58	51.92	51.82	67.64	72.11	196.67	183.84	162.42	396.02	419.67	142.17
scaffold1_16.5	93909	94712	heme ABC transporter ATP-binding protein	124	63.82	66.96	60.83	38.92	52.57	55.27	40.05	240.31	328.68	325.94	114.57
scaffold1_16.5	94691	96421	ATP-binding cassette domain-containing protein	125	73.04	90.11	73.91	53.67	62.55	84.87	84.21	178.53	424.28	400.73	52.49
scaffold1_16.5	96418	98091	ABC transporter ATP-binding protein	126	56.99	70.94	64.85	51.57	69.94	82.04	105.78	208.8	335.47	336.46	105.99
scaffold1_16.5	98120	98806	dephospho-CoA kinase	127	36.25	53.37	39.2	40.88	58.02	41.24	51.48	213.56	393.29	408.93	102.87
scaffold1_16.5	99645	100882	HtaA domain-containing protein	128	13.94	21.57	15.07	12.99	14.91	149.98	129.53	213.66	93.51	90.27	290.74
scaffold1_16.5	101340	102320	ATP-binding protein	129	24.03	45.23	25.43	17.37	15.82	304.94	303.17	88.43	127.59	78.24	38.03
scaffold1_16.5	102322	104124	VWA domain-containing protein	130	38.37	36.73	33.81	44.25	44.99	369.8	371.06	94.19	256.2	205.89	56.22
scaffold1_16.5	104124	104538	hypothetical protein	131	29.03	34.39	30.42	20.34	25.67	1467.68	1118.99	84.4	36.51	9.15	28.52
scaffold1_16.5	104694	107972	cobaltochelatase subunit CobN	132	5.41	6.39	6.92	5.68	4.66	90.32	91.87	62.88	83.76	103.14	18.3
scaffold1_16.5	108379	108526	magnesium chelatase	133	23.3	40.31	19.04	18.97	28.35	141.39	114.5	96.47	157.77	147.78	60.42
scaffold1_16.5	108523	109332	ABC transporter ATP-binding protein	134	41.62	63.95	35.86	34.88	41.38	135.75	113.28	139.05	99.96	167.83	132.87
scaffold1_16.5	109334	110262	iron ABC transporter permease	135	35.31	46.47	31.5	20.02	26.59	76.34	73.48	47.07	141.43	127.97	22.3
scaffold1_16.5	110372	111184	ABC transporter substrate-binding protein	136	27.12	46.3	30.34	20.02	20.89	396.56	340.97	80.46	105.75	60.66	50.37
scaffold1_16.5	111304	111543	hypothetical protein	137	16.52	31.72	20.51	22.82	23.2	289.95	281.99	24.79	66.62	46.11	21.99
scaffold1_16.5	111829	112026	hypothetical protein	138	49.23	48.79	42.22	49.35	37.35	71.94	56.42	62.13	154.99	178.66	69.13
scaffold1_16.5	112139	112759	ATP-binding cassette domain-containing protein	139	84.57	97.07	82.69	37.69	51.24	11.78	15.9	23.26	209.69	217.08	78.49
scaffold1_16.5	112800	113172	hypothetical protein	140	54.88	67.89	50.46	35.76	40.41	0	0	0.19	237.01	245.97	25.44
scaffold1_16.5	113330	114267	hypothetical protein	141	100.87	135.04	107.95	125.74	124.87	155.08	148.2	53.26	337.77	417.18	129.55
scaffold1_16.5	114266	114505	chitooligosaccharide deacetylase	142	50.89	86.47	68.3	67.64	66.34	11.18	8.99	21.03	47.73	98.55	15.03
scaffold1_16.5	114911	115192	lactococcin 972 family bacteriocin	143	174.51	215.88	182.34	215.82	207.98	0	0	0.26	762.8	965.82	107.4
scaffold1_16.5	115367	117472	excinuclease ABC subunit UvrB	144	279.96	343.71	263.54	195.3	238.36	374.07	306.84	508.75	342.08	337.01	173.05
scaffold1_16.5	117663	118652	TerC family protein	145	255.28	296.56	264.7	181.22	161.03	490.17	411.74	1056.48	414.23	479.7	1025.8
scaffold1_16.5	118661	119317	MBL fold metallo-hydrolase	146	179.9	256.57	197.33	153.43	179.38	957.87	913.96	709.83	459.91	486.78	361.24
scaffold1_16.5	119362	120105	maleylpyruvate isomerase family mycothiol-dependent enzyme	147	237.31	323.16	252.74	273.21	345.43	297.52	335.22	159.75	463.89	554.38	157.46
scaffold1_16.5	120247	123243	excinuclease ABC subunit UvrA	148	221.51	274.19	217.55	228.94	247.08	305.24	293.65	401.54	504.34	418.47	348.71
scaffold1_16.5	123230	123637	Rieske (2Fe-2S) protein	149	274.12	295.77	273.93	251.84	297.71	257.93	253.47	379.66	619.12	531.04	313.68
scaffold1_16.5	123653	124399	histidine phosphatase family protein	150	363.13	417.36	362.44	328.77	386.07	280.04	258.06	268.13	608.04	537.96	134.38
scaffold1_16.5	124577	126226	hypothetical protein	151	41.2	43.75	43.22	32.43	32.92	100.15	87.28	149.94	386.37	276.95	241.19
scaffold1_16.5	126419	128437	excinuclease ABC subunit UvrC	152	133.27	168.81	144.03	136.91	135.81	157.09	144.03	281.62	284.61	265.43	194.51
scaffold1_16.5	128456	129331	RNase adapter RapZ	153	272.06	315.92	287.83	246.7	287.59	167.91	165.54	334.99	461.17	435.58	443.47
scaffold1_16.5	129328	130296	uridine diphosphate-N-acetylglucosamine-binding protein YvcK	154	317.57	353.12	330.36	248.12	277.56	154.19	166.93	246.09	338.35	389.24	254.61
scaffold1_16.5	130353	131342	DNA-binding protein WhiA	155	209.15	236.96	200.33	179.43	183.48	151.96	141.04	332.5	544.99	485.3	326.29
scaffold1_16.5	131576	132583	type I glyceraldehyde-3-phosphate dehydrogenase	156	6002.89	4597.07	5598.85	5965.22	6059.45	6942	8197.97	1637.93	1080.21	1350.39	2069.82
scaffold1_16.5	132706	133914	phosphoglycerate kinase	157	1503.44	1141.1	1508.86	1201.75	946.68	1587.61	1566.5	570.15	930.01	1088.33	1098.09
scaffold1_16.5	133914	134693	triose-phosphate isomerase	158	2377.4	1992.75	2313.77	2497.72	2168.48	2204.24	2366.8	1449.9	1035.02	1244.78	1856.39
scaffold1_16.5	134851	135093	preprotein translocase subunit SecG	159	451.54	365.8	465.76	323.81	354.46	275.79	262.09	305.73	847.2	723.67	275.66
scaffold1_16.5	135211	135567	RNA polymerase-binding protein RbpA	160	620.08	475.96	601.94	636.47	576.81	302.69	311.3	423.66	755.43	618.9	298.14
scaffold1_16.5	135564	137009	bifunctional folylpolyglutamate synthase/dihydrofolate synthase	161	225.94	278.75	243.44	244.78	229.24	164.5	162.09	471.19	762.12	745.09	449.17
scaffold1_16.5	137006	137392	DUF4233 domain-containing protein	162	126.75	193.16	160.75	128.58	135.13	84.77	83.07	415.47	684.35	623.42	405.57
scaffold1_16.5	137426	137842	nucleoside-diphosphate kinase	163	480.47	473.88	503.7	444.79	473.2	273.17	251.83	840.35	789.22	835.79	425.36
scaffold1_16.5	137888	139840	TIGR03960 family B12-binding radical SAM protein	164	258.57	314.58	261.93	133.02	127.66	76.53	72.78	167.37	488.8	387.27	149.23
scaffold1_16.5	139843	140577	DUF2344 domain-containing protein	165	153.92	222.54	160.13	92.81	95.29	39.03	33.62	96.36	462.43	364.8	78.6
scaffold1_16.5	141063	143474	Rne/Rng family ribonuclease	166	521.63	761.29	553.18	492.38	500.35	1120.78	1108.42	1660.36	800.94	844.14	2527.31
scaffold1_16.5	143635	143943	50S ribosomal protein L21	167	2128.63	2135.98	2087.62	2215.17	2432.67	3032.13	2745.46	3219.92	1008.82	1329.15	3601.42
scaffold1_16.5	143955	144224	50S ribosomal protein L27	168	1935.99	1639.71	1837.43	2021.41	1755.37	3781.44	3410.9	3510.1	1023.08	1330.86	3347.55
scaffold1_16.5	144394	145053	hypothetical protein	169	338.26	274.24	303.19	220.6	230.81	212.38	225.58	267.2	725.08	795.61	171.38
scaffold1_16.5	145136	145744	helix-turn-helix transcriptional regulator	170	363.52	348.12	357.48	431.61	454.02	682.5	603.6	237.68	626.95	677.72	296.56
scaffold1_16.5	145839	147602	MFS transporter	171	118.66	135.46	125.01	97.14	110.4	131.24	122.57	134.98	463.02	391.04	120.91
scaffold1_16.5	147706	149223	GTPase ObgE	172	645.53	724.31	635.21	653.2	769.6	334.21	327.52	777.56	784.14	799.66	1293.13
scaffold1_16.5	149216	150391	glutamate 5-kinase	173	306.92	414.82	314.53	390.83	387.48	230.75	226.32	635.46	558.27	689.4	913.77
scaffold1_16.5	150440	151687	glutamate-5-semialdehyde dehydrogenase	174	115.28	105.74	117.03	112.37	120.45	88.34	73.68	278.64	504.33	434.29	303.6
scaffold1_16.5	151857	152525	nicotinate-nucleotide adenylyltransferase	175	516.04	717.4	588.3	543.75	577.03	420.57	429.3	1459.5	814.26	823.24	1363.75
scaffold1_16.5	152522	152926	ribosome silencing factor	176	271.99	400.44	321.67	249.08	277	204.19	185.31	1143.98	790.49	731.92	1114.37
scaffold1_16.5	152923	153594	histidine phosphatase family protein	177	187.81	275.67	215.18	174.2	205.43	141.49	145.54	1199.84	701.71	813.8	969.48
scaffold1_16.5	153770	154270	hypothetical protein	179	53.77	55.53	66.17	78.54	102.7	79.9	83.31	217.26	0	0	0
scaffold1_16.5	154552	155112	flavin reductase	180	22.39	16.64	17.48	26.31	23.67	55.35	61.1	70.74	0	0	34.83
scaffold1_16.5	155244	155496	hypothetical protein	181	9.44	5.58	9.23	10.28	8.29	14.95	20.54	71.03	0	0	26.06
scaffold1_16.5	155711	156004	helix-turn-helix transcriptional regulator	182	26.45	40.58	32.01	33.53	36.78	380.27	333.12	119.53	0	0	8.71
scaffold1_16.5	156230	157174	hypothetical protein	183	15.24	17.02	14.23	20.16	23.8	29.83	30.63	97.68	127.28	121.19	47.2
scaffold1_16.5	157354	158346	phosphotriesterase-related protein	184	25.44	19.86	20.39	28.18	29.36	34.15	28.1	39.32	42.89	54.01	9.77
scaffold1_16.5	158352	159005	orotidine 5'-phosphate decarboxylase	185	32.72	29.39	30.74	49.7	37.08	27.57	34.99	57.54	78.42	70.19	18.95
scaffold1_16.5	159002	159889	L-ribulose-5-phosphate 3-epimerase	186	36.01	31.96	33.57	41.17	39.54	23.69	19.32	46.73	114.65	79.59	24.96
scaffold1_16.5	159977	160645	L-ribulose-5-phosphate 4-epimerase	187	34.33	35.01	34.36	40	36.78	64.58	59.23	38.32	106.24	126.18	16.31
scaffold1_16.5	160642	161592	sugar kinase	188	49.96	50.83	44.35	46.45	39.88	57.25	46.39	71.4	124.45	142.71	18.67
scaffold1_16.5	161627	162985	MFS transporter	189	24.18	35.06	29.07	22.41	21.15	57.33	54.74	54.94	65.22	59.68	13.01
scaffold1_16.5	163582	164415	hydroxyethylthiazole kinase	190	408.74	351.79	347.61	306.08	325.23	146.51	156.92	207.83	699.08	754.6	208.12
scaffold1_16.5	164402	165052	thiamine phosphate synthase	191	286.56	259.65	276.57	274.91	335.39	119.52	123.78	164.7	522.2	595.33	114.94
scaffold1_16.5	165165	166133	L-lactate dehydrogenase	192	532.69	455.3	525.9	419.63	437.56	347.66	344.34	211.34	581.8	439.98	170.43
scaffold1_16.5	166176	167882	NAD-dependent malic enzyme	193	1572.69	1442.35	1524.6	1249.85	1326.48	1089.59	1144.11	465.46	780.55	736.18	929.47
scaffold1_16.5	167952	168194	hypothetical protein	194	723.17	702.25	747.76	622.8	575.2	441.84	455.05	127.05	740.51	700.32	840.29
scaffold1_16.5	168187	168540	hypothetical protein	195	539.27	459.69	508.7	401.93	360.52	370.53	379.28	129.91	599.34	646.16	528.25
scaffold1_16.5	168646	169668	DUF4192 domain-containing protein	196	151.27	145.56	160.11	122.77	119.87	148.64	153.02	129.06	344.91	369.68	238.36
scaffold1_16.5	169678	170607	VIT family protein	197	168.29	239.08	196.7	290	340.9	331.29	327.51	283.87	400.06	540.9	130.23
scaffold1_16.5	170656	173136	leucine--tRNA ligase	198	381.68	461.17	405.96	393.1	394.43	681.86	628.21	819.89	677.66	739.06	883.92
scaffold1_16.5	173260	174111	helix-hairpin-helix domain-containing protein	199	46.74	47.6	49.46	66.38	58.75	118.89	92.73	124.11	101.75	154.89	45.37
scaffold1_16.5	174164	176452	ComEC/Rec2 family competence protein	200	28.43	26.82	24.25	30.32	33.89	49.96	54.27	79.16	103.71	89.89	29.22
scaffold1_16.5	176582	178291	DEAD/DEAH box helicase family protein	201	108.1	105.93	104.99	93.89	114.72	55.01	48.58	155.71	358.31	295.18	101.29
scaffold1_16.5	178681	179703	DNA polymerase III subunit delta	202	189.84	213.21	194.06	184.52	171.03	172.53	172.4	403.99	630.65	552.16	326.16
scaffold1_16.5	179831	180097	30S ribosomal protein S20	203	1490.29	2202.68	1615.12	2132.86	2225.92	7908.19	9599.2	3039.03	1155.49	1350.72	1826.84
scaffold1_16.5	180218	182132	alpha-amylase family protein	204	159.72	192.99	156.54	202.21	235.71	162.68	138.14	142.2	190.67	201.65	101.17
scaffold1_16.5	182248	184095	elongation factor 4	205	407.42	610.91	464.52	409.61	473.97	643.43	586.32	498.42	486.9	528.57	639.17
scaffold1_16.5	184092	185099	o-succinylbenzoate synthase	206	335.89	505.98	369.41	376.59	386.01	277.49	266.31	584.49	455.82	499.44	691.22
scaffold1_16.5	185134	186627	2-succinyl-5-enolpyruvyl-6-hydroxy-3- cyclohexene-1-carboxylic-acid synthase	207	329.77	367.47	342.59	422.17	394.87	208.25	243.37	376.34	392.61	400.84	415.18
scaffold1_16.5	186600	187805	chorismate-binding protein	208	190.17	183.51	198.13	203.95	201.51	78.98	105.66	202.58	252.35	248.6	146.73
scaffold1_16.5	188367	189551	AMP-binding protein	209	222.56	209.89	232.77	256.56	213.57	72.93	85.67	333.12	556.15	629.69	223.03
scaffold1_16.5	189559	190548	1,4-dihydroxy-2-naphthoyl-CoA synthase	210	498.48	399.65	487.25	344.54	303.82	162.87	174.11	311.91	662.3	603.1	211.39
scaffold1_16.5	190573	191094	rhomboid family intramembrane serine protease	211	473.13	413.29	460.1	271.23	288.27	559.08	478.49	309.02	749.86	689.16	470.23
scaffold1_16.5	191420	191649	acetyl-CoA synthetase	212	29.36	36.92	27.61	31.57	19.57	119.4	93.07	86.21	170.74	146.19	8.93
scaffold1_16.5	191665	192333	AMP-binding protein	213	48.79	79.25	53.26	40.79	31.11	88.36	76.32	93.39	161.43	109.65	8.18
scaffold1_16.5	192337	192555	AMP-binding protein	214	63.86	119.67	70.44	38.64	38.82	71.36	72.83	66.21	106.86	88.07	5.43
scaffold1_16.5	192647	192886	twin-arginine translocation signal domain-containing protein	215	53.3	85.93	62.37	32.38	28.8	301.63	259.95	42.98	166.21	111.26	28.11
scaffold1_16.5	192998	193135	alpha/beta hydrolase	216	34.18	44.03	39.66	32.91	28.67	234.32	214.07	50.82	399.4	300.27	37.7
scaffold1_16.5	193122	194315	coproporphyrinogen III oxidase	217	101.96	106.63	94.31	60.39	70.5	90.84	83.82	194.89	352.53	318.15	114.38
scaffold1_16.5	194388	195266	DUF3097 domain-containing protein	218	228.15	301.69	237.62	167.21	206.58	131.3	135.92	401.31	412.92	370.22	157.15
scaffold1_16.5	195263	196024	inositol monophosphatase family protein	219	291.65	352.47	298.92	223.83	305.21	314.08	299.96	445.36	550.3	467.29	235.84
scaffold1_16.5	196043	196714	MBL fold metallo-hydrolase	220	209.31	220.22	221.22	200.89	230.95	152.97	144.32	157.85	474.84	319.97	313.38
scaffold1_16.5	196858	197877	heat-inducible transcriptional repressor HrcA	221	1623.43	1080.09	1423.14	1797.29	1669.86	449.28	470.19	928.28	643.83	874.13	1318.3
scaffold1_16.5	197881	199059	molecular chaperone DnaJ	222	708.9	591.81	690.8	635.44	585.55	193.97	187.44	622.9	446.58	567.63	656.45
scaffold1_16.5	199056	199796	16S rRNA (uracil(1498)-N(3))-methyltransferase	223	366.94	368.35	344.53	295.88	293.85	129.88	115.42	539.92	448.74	539.65	654.02
scaffold1_16.5	199815	200861	zinc-dependent dehydrogenase	224	129	110.21	130.13	101.07	90.25	141.09	129.27	150.39	236.12	220.13	183.16
scaffold1_16.5	200890	202797	PTS mannitol transporter subunit IICBA	225	56.93	53.2	51.32	64.65	74.69	197.55	175.99	143.64	284.17	284.5	45.55
scaffold1_16.5	202988	203389	DoxX family protein	226	1117.45	793.69	1066.51	858.26	833.97	746.82	751.58	539.69	870.38	819.85	220.08
scaffold1_16.5	203551	205722	ATP-dependent DNA helicase RecQ	227	150.18	191.38	164.73	175.14	201.98	212.03	208.01	319.93	402.84	288.43	288.17
scaffold1_16.5	205784	207001	UDP-N-acetylglucosamine pyrophosphorylase	228	692.04	639.82	672.73	544.77	657.68	733.99	701.12	332.6	582.37	560.65	665.32
scaffold1_16.5	207044	207895	EamA family transporter	229	104.09	107.95	104.2	89.02	92.55	503.21	417.44	164.53	325.04	253.15	109.28
scaffold1_16.5	207982	209223	tRNA guanosine(34) transglycosylase Tgt	230	94.44	104.63	104.97	98.64	93.25	200.94	189.65	192.19	296.82	232.27	160.2
scaffold1_16.5	209271	210620	sensor histidine kinase	231	189.72	207.3	200.71	229.29	247.13	756.26	705.41	506.59	618.32	589.73	742.57
scaffold1_16.5	210620	211277	response regulator transcription factor	232	141.9	156	146.9	148.5	153.97	322.99	315.95	337.98	409.9	381.19	638.08
scaffold1_16.5	211362	212282	ATP-binding cassette domain-containing protein	233	60.18	60.4	64.89	58.88	59.31	7376.91	7757.73	194.12	326.76	238.14	797.13
scaffold1_16.5	212279	213490	ABC transporter permease	234	19.13	19.79	19.14	20.7	17.53	4121.45	3977.12	90.33	230.42	166.46	387.67
scaffold1_16.5	213672	214424	queuosine precursor transporter	235	62.75	71.13	69.84	55.75	62.34	860.09	775.44	114.44	261.19	164.89	174.19
scaffold1_16.5	214462	215382	prolyl aminopeptidase	236	246.03	244.73	241.56	225.9	267.81	578.69	527.87	221.57	388.15	302.19	251.37
scaffold1_16.5	215600	216012	hypothetical protein	237	71.05	70.25	71.73	43.18	55.96	326.62	296.28	55.14	248.24	210.79	107.88
scaffold1_16.5	216030	216773	phosphotransferase	238	79.7	75.45	69.44	74.25	66.31	122.5	99.26	110.63	347.83	372.71	80.65
scaffold1_16.5	216795	217163	hypothetical protein	239	40.59	32.06	42.47	34.85	29.93	38.01	28.66	147.09	303.6	418.93	98.35
scaffold1_16.5	217257	218276	PhoH family protein	240	429.36	664.36	471.22	354.22	363.22	584.83	463.12	340.35	510.85	457.82	337.78
scaffold1_16.5	218273	218740	rRNA maturation RNase YbeY	241	474.6	746.11	474.15	357.67	418.73	544.72	511.87	510.94	584.21	550.02	524.41
scaffold1_16.5	218737	220035	HlyC/CorC family transporter	242	301.93	431.78	318.52	210.97	204.46	390.49	351.89	391.12	579.46	523.5	352.53
scaffold1_16.5	220022	221050	GTPase Era	243	310.37	374.83	326.77	253.54	260.37	365.57	348.92	458.79	634.28	500.33	353.67
scaffold1_16.5	221079	222569	amidohydrolase family protein	244	82.74	83.25	80.36	83.87	69.86	60.24	58.63	175.32	279.97	224.98	147.27
scaffold1_16.5	222771	224515	2-isopropylmalate synthase	245	150.15	186.83	161.45	207.69	192.08	316.55	287.68	167.61	408.58	383.89	68.86
scaffold1_16.5	224524	225330	isoprenyl transferase	246	200.17	183.22	193.88	161.47	175.48	128.06	124.95	253	572.34	428.69	126.77
scaffold1_16.5	225432	226097	hypothetical protein	247	83.77	60.03	69.8	57.22	54.37	107.41	101.75	121.62	215.73	185.77	185.36
scaffold1_16.5	226217	226957	DNA repair protein RecO	248	196.8	223.67	199.18	169.99	136.16	153.48	138.42	160.3	538.13	466.61	135.51
scaffold1_16.5	227055	228218	sensor histidine kinase	249	1128.65	1267.11	1154.88	804.84	759.02	1082.51	1001.66	227.32	800.56	834.87	208.54
scaffold1_16.5	228271	228453	hypothetical protein	250	2260.94	2025.98	2193.28	2347.49	2852.74	2055.44	2282.47	310.77	990.85	925.25	217.89
scaffold1_16.5	228796	229467	response regulator transcription factor	251	691.26	879.7	722.43	724.31	765.47	1036.73	932.59	978.9	819.3	785.33	775.56
scaffold1_16.5	229468	229884	transcriptional repressor	252	873.89	840.62	843.78	1166.04	1235.6	1280.61	1074.39	672.67	1064.84	1144.55	1027.92
scaffold1_16.5	229977	231497	glycine--tRNA ligase	253	438.88	409.05	430.13	344.52	342.85	476.34	478.58	687.61	541.85	569.91	446.37
scaffold1_16.5	231638	232408	succinate dehydrogenase cytochrome b subunit	254	447.02	412.37	369.87	291.19	291.83	125.15	118.56	190.61	339.88	462.56	246.58
scaffold1_16.5	232405	234537	fumarate reductase/succinate dehydrogenase flavoprotein subunit	255	391.65	291.47	352.17	279.69	259.19	96.1	95.72	167.74	295.26	374.87	266.34
scaffold1_16.5	234534	235292	succinate dehydrogenase/fumarate reductase iron-sulfur subunit	256	380.12	309.17	347.41	303.29	295.45	103.69	104.44	255.53	403.02	457.42	576.46
scaffold1_16.5	235448	237217	5,6-dimethylbenzimidazole synthase	257	166.12	130.36	164.87	144.1	127.89	73.56	74.26	146.52	150.96	129.28	45.19
scaffold1_16.5	237271	238500	tRNA dihydrouridine synthase DusB	258	62.75	67.23	65.94	65.47	70.89	75.72	74.08	178.87	330.79	272.73	124.36
scaffold1_16.5	238549	239667	HD domain-containing protein	259	175.29	195.68	181.39	149.35	187.2	108.77	94.03	298.94	451.52	351.99	319.13
scaffold1_16.5	239687	240484	ABC transporter permease	260	77.99	95.82	84.7	61.45	73.46	96.46	87.02	165.75	428.3	303.07	105.41
scaffold1_16.5	240485	242356	DNA primase	261	384.9	523.99	397.62	433.2	578.5	636.19	609.96	523.6	474.07	502.23	673.44
scaffold1_16.5	242443	243255	sigma-70 family RNA polymerase sigma factor	262	33.06	39.05	35.41	29.47	34.61	65.49	49.39	124.76	289.99	277.44	142.95
scaffold1_16.5	243260	243775	hypothetical protein	263	479.23	555.13	446.33	445.3	627.21	431.71	450.45	779.89	436	502.93	757.67
scaffold1_16.5	244096	245076	MsnO8 family LLM class oxidoreductase	265	456	394.22	432.55	281.74	294.12	330.55	321.37	354.4	349.3	389.18	123.04
scaffold1_16.5	245118	246521	trehalose-6-phosphate synthase	266	600.51	540.99	579.21	346.19	383.88	210.38	216.55	212.2	420.67	309.01	194.11
scaffold1_16.5	246646	247539	trehalose-phosphatase	267	118.95	164.11	105.46	93.6	104.14	69.71	84.81	209.86	326.31	294.3	210.12
scaffold1_16.5	247586	247822	kinetochore protein	268	166.61	171.92	169.82	152.43	188.63	150.17	130.25	2210.44	585.84	787.31	1465.56
scaffold1_16.5	248086	249021	cysteine synthase A	269	129.25	102.13	123.79	106.6	110.89	76.09	66.42	1172.77	602.86	876.34	1205.29
scaffold1_16.5	249083	250495	PLP-dependent aminotransferase family protein	270	159.22	144.23	158.74	163.58	164.18	62.74	55.89	316.31	231.54	455.72	495.51
scaffold1_16.5	250579	251484	pyridoxal 5'-phosphate synthase lyase subunit PdxS	271	599.89	405.44	578.36	529.99	466.96	1309.64	1199.77	1971.61	481.6	388.95	1344.7
scaffold1_16.5	251444	252091	pyridoxal 5'-phosphate synthase glutaminase subunit PdxT	272	550.61	432.48	546.46	769.2	650.21	855.54	886.19	1328.14	476.06	483.05	1030.14
scaffold1_16.5	252162	253514	adenosylmethionine--8-amino-7-oxononanoate transaminase	273	111.77	80.33	101.1	93.58	74.91	189.29	176.15	208.44	223.56	226.46	105.94
scaffold1_16.5	253511	254215	dethiobiotin synthase	274	17.67	23.19	22.92	13.45	17.11	27.55	25.56	51.54	91.84	78.38	13.43
scaffold1_16.5	254212	255573	APC family permease	275	36.43	43.25	31.27	29.56	28.52	46.13	43.49	48.59	85.12	74.38	16.34
scaffold1_16.5	255586	255789	hypothetical protein	276	23.4	34.78	21.56	24.06	25.17	38.99	43.82	44.14	182.07	163.3	12.99
scaffold1_16.5	256001	256071	cell division protein FtsA	277	29.77	19.57	19.43	29.51	28.21	49.36	51.81	109.14	263.03	354.88	54.13
scaffold1_16.5	256567	256788	hypothetical protein	279	108.14	126.61	110.3	126.77	116.97	239.52	228.91	181.47	99.4	151.61	9.49
scaffold1_16.5	257513	258310	HAD family hydrolase	280	126.59	184.64	142.24	160.25	218.97	196.84	217.73	207.84	346.35	374.55	345.78
scaffold1_16.5	258310	259242	hypothetical protein	281	245.49	305.89	281.65	280.21	295.01	195.63	200.78	309.85	310.01	309.42	285.19
scaffold1_16.5	259325	260512	MoxR family ATPase	282	358.59	338.12	371.71	265.71	292.48	385.71	376.98	307.73	782.94	789.71	329.16
scaffold1_16.5	260562	261566	DUF58 domain-containing protein	283	360.24	400.04	354.78	287.05	313.49	224.6	251.11	348.32	670.14	687.03	405.87
scaffold1_16.5	261563	262531	VWA domain-containing protein	284	359.84	433.25	362.9	216.45	245.35	365.89	326.33	339.96	786.78	822.36	400.41
scaffold1_16.5	262522	263484	VWA domain-containing protein	285	313.97	310.15	302.46	210.83	219.35	396.34	400.72	481.11	888.6	926.18	516.52
scaffold1_16.5	263533	264249	YggS family pyridoxal phosphate-dependent enzyme	286	232.66	230.02	221.5	185.95	193.36	391.01	327.42	309.88	654.98	572.35	319.79
scaffold1_16.5	264327	264824	DUF3145 family protein	287	403.5	430.13	378.99	390.24	477.46	458.55	473.13	735.79	681.68	766.18	726.71
scaffold1_16.5	264908	266179	beta-ketoacyl-[acyl-carrier-protein] synthase family protein	288	550.92	478.55	588.99	484.59	386.51	501.77	541.66	580.53	547.44	438.8	801.76
scaffold1_16.5	266253	266498	acyl carrier protein	289	637.27	637.12	647.58	408.46	320.67	1334.94	1050.79	1689.97	721.3	506.33	1419.03
scaffold1_16.5	266581	267579	ketoacyl-ACP synthase III	290	456.7	467.5	521.68	446.47	399.77	304.77	356.84	365.92	606.16	337.25	330.36
scaffold1_16.5	267576	268508	ACP S-malonyltransferase	291	760.7	824.16	785.77	839.86	728.98	768.05	803.75	834.86	685.53	445.3	612.71
scaffold1_16.5	268637	269551	2-dehydropantoate 2-reductase	292	628.12	635.75	606.59	418.63	472.43	283.75	257.95	176.74	415.35	303.57	236.53
scaffold1_16.5	269548	269913	dinitrogenase iron-molybdenum cofactor	293	465.07	586.25	483.96	387.97	576.11	567.88	591.75	309.65	454.23	264.57	320.22
scaffold1_16.5	270076	271521	sugar porter family MFS transporter	294	238.4	286.23	251.21	179.55	182.99	393.35	363.45	307.88	637.88	585.16	334.96
scaffold1_16.5	271543	272664	helix-turn-helix domain-containing protein	295	363.13	410.12	371.06	288.6	285.6	293.88	316.6	298.55	642.52	697.75	354.3
scaffold1_16.5	273002	275788	pyruvate dehydrogenase (acetyl-transferring), homodimeric type	296	519	422.38	491.93	397.35	402.35	257.7	225.44	262.17	377.53	392.01	532.82
scaffold1_16.5	276080	276856	endo-beta-N-acetylglucosaminidase	297	46.49	57.5	48.21	37.26	32.94	45.11	39.61	65.78	278.47	274.16	41.32
scaffold1_16.5	276922	277377	DUF3052 domain-containing protein	298	240.05	229.9	222.53	217.68	250.65	731.93	671.36	1923.42	887.65	1021.15	2611.8
scaffold1_16.5	277482	279230	glycoside hydrolase family 3 C-terminal domain-containing protein	299	84.49	93.07	92.12	114.24	99.61	264.57	253.75	142.99	131.52	140.8	99.67
scaffold1_16.5	279227	279718	glycosyl hydrolase	300	130.85	138.67	125.5	171.42	182.45	426.1	442.41	89.88	0	0	0
scaffold1_16.5	279818	280399	isochorismatase family protein	301	129.41	162.38	135.06	159.33	150.46	177.31	155.31	81.34	342.38	315.26	99.48
scaffold1_16.5	280444	281454	L-glyceraldehyde 3-phosphate reductase	302	197	245.41	222.75	157.67	166.27	77.29	82.16	106.72	286.47	225.6	43.37
scaffold1_16.5	281606	282181	bifunctional pyr operon transcriptional regulator/uracil phosphoribosyltransferase PyrR	303	1961.9	1202.53	1664.46	1178.19	1219.29	1241.77	1257.94	269.94	445.11	423.38	223.26
scaffold1_16.5	282178	283122	aspartate carbamoyltransferase catalytic subunit	304	2477.13	1532.08	2144.39	1521.34	1674.51	360.77	328.42	154.12	443.14	313.68	103.28
scaffold1_16.5	283119	284456	dihydroorotase	305	2428.51	1648.29	2138.54	2059.47	2119.84	447.11	512.4	468.71	501.11	521.17	426.16
scaffold1_16.5	284453	285541	glutamine-hydrolyzing carbamoyl-phosphate synthase small subunit	306	1605.56	1026.91	1406.39	923.61	937.8	314.82	311.39	197.98	327.67	261.52	120.51
scaffold1_16.5	285541	288747	carbamoyl-phosphate synthase large subunit	307	1094.24	854.97	997.72	632.93	657.69	583.91	530.7	253.47	347.8	316.53	172.22
scaffold1_16.5	288747	289541	dihydroorotate dehydrogenase electron transfer subunit	308	577.15	502.54	531.19	381.07	370.67	115.37	113.85	285.65	338.7	312.22	271.51
scaffold1_16.5	289538	290461	dihydroorotate dehydrogenase	309	634.25	563.62	572.92	468.12	464.5	400.23	358.82	315.02	356.51	246.76	184.89
scaffold1_16.5	290487	291197	orotidine-5'-phosphate decarboxylase	310	767	601.39	682.68	459.18	485.31	146.3	144.4	205.15	275.91	246.27	178.5
scaffold1_16.5	291225	291875	orotate phosphoribosyltransferase	311	629.22	536.23	564.83	415.16	392.21	263.1	227	247.75	344.33	335.9	265.47
scaffold1_16.5	292257	293063	fructosamine kinase family protein	312	240.8	198.94	220.52	158.15	171.3	82.88	78.72	112.76	176.48	168.96	95.09
scaffold1_16.5	293095	294518	30S ribosomal protein S12 methylthiotransferase RimO	313	116.21	109.32	113.99	92.88	85.04	136.03	134.69	213.22	497.17	470.51	470.28
scaffold1_16.5	294627	295241	CDP-diacylglycerol--glycerol-3-phosphate 3-phosphatidyltransferase	314	678.04	818.95	621.05	647.19	782.81	2015.34	2161.85	316.42	460.43	470.32	455.79
scaffold1_16.5	295238	295723	CinA family protein	315	513.47	574.14	475.68	589.17	655.3	599.35	573.93	212.95	227.87	244.5	291.71
scaffold1_16.5	295825	296100	helix-turn-helix transcriptional regulator	316	2141.93	2228.5	2470.15	3888.85	4126.05	14319.4	17683.9	4798.11	1155.34	1464.19	4236.6
scaffold1_16.5	296202	296960	DeoR/GlpR transcriptional regulator	317	581.2	551.81	673.83	886.42	821.57	4951.58	5153.35	3805.63	847.64	1096.12	3140.34
scaffold1_16.5	297357	297551	DUF3046 domain-containing protein	318	330.3	490.7	331.11	393.19	425.02	788.45	745.99	821.79	697.34	814.9	776.4
scaffold1_16.5	297525	297710	hypothetical protein	319	656.34	793.35	626.06	698.15	756.97	1225.15	1029.88	1697.79	871.06	959.27	2018.14
scaffold1_16.5	297862	298908	recombinase RecA	320	514.1	538.38	529.55	550.11	568.57	854.81	795.84	1917.83	892.01	1016.44	1946.78
scaffold1_16.5	298905	299453	recombination regulator RecX	321	404.61	473.32	411.72	485.68	503.59	677.5	674.4	1678.39	826.29	1024.83	1584.57
scaffold1_16.5	299479	301185	ribonuclease Y	322	150.75	169.01	154.77	144.57	137.27	278.76	221.26	907.39	653.93	701.2	784.93
scaffold1_16.5	301226	302125	aldose 1-epimerase family protein	323	264.61	228.96	265.87	214.93	221.36	538.35	549.51	280.84	380.98	347.19	160.94
scaffold1_16.5	302289	303830	YfcC family protein	324	290.99	239.45	290.9	220.33	207.7	322.55	295.55	177.06	136.68	142.31	37.08
scaffold1_16.5	303891	305369	tRNA (N6-isopentenyl adenosine(37)-C2)-methylthiotransferase MiaB	325	207.15	237.7	212.92	144.81	145.64	246.62	217.19	443.93	602.09	568.04	207.83
scaffold1_16.5	305520	305720	antitoxin	326	5526.71	4402.72	4695.43	5210.43	5123.26	10242.9	12498.4	4613.66	1229.11	1624.63	3468.9
scaffold1_16.5	305839	306798	tRNA (adenosine(37)-N6)-dimethylallyltransferase MiaA	327	123.04	161.81	128.69	163.86	176.49	139.67	113.35	209.33	347.74	287.73	157.64
scaffold1_16.5	306803	307624	diaminopimelate epimerase	328	244.9	309.46	252.85	277.77	384.53	373.59	338.24	465.22	711.19	592.84	665.68
scaffold1_16.5	307679	309160	GTPase HflX	329	184.42	264.63	207.37	178.32	212.04	154.66	155.25	242.46	537.23	456.76	371.05
scaffold1_16.5	309150	311198	ATP-dependent DNA helicase	330	185.49	271.2	197.06	198.26	212.16	244.2	248.23	254.53	544.84	500.13	387.85
scaffold1_16.5	311308	311982	LexA family transcriptional regulator	331	298.77	364.97	296.65	265.93	330.31	1233.33	1137.33	177.39	631.03	664.49	313.82
scaffold1_16.5	312250	312600	hypothetical protein	332	135.61	230.83	169.29	598.51	687.36	1117.4	1074.61	1383.82	816.71	734.21	2325.2
scaffold1_16.5	312825	313331	transcriptional repressor NrdR	333	506.36	845.14	660.59	1019.7	1415.29	4544.78	4755.37	2009.17	874.94	1046.29	2625.44
scaffold1_16.5	313413	316265	vitamin B12-dependent ribonucleotide reductase	334	245.27	334.4	335.49	445.92	576.06	907.11	818.48	1156.6	732.55	707.04	1261.49
scaffold1_16.5	316430	317362	YbjN domain-containing protein	335	492.01	537.06	484.97	512.52	586.17	380.8	325.82	264.89	455.74	493.92	411.15
scaffold1_16.5	317446	318300	universal stress protein	336	1373.09	1061.84	1258.93	1158.66	1030.25	609.42	618.28	429.41	754.59	829.43	769.17
scaffold1_16.5	318745	322830	ATP-dependent RNA helicase HrpA	337	106.45	109.11	104.78	82.04	81.28	148.6	142.63	144.21	419.7	382.24	139.95
scaffold1_16.5	322994	323890	thioesterase family protein	338	888.26	756.3	811.5	454.69	385.77	2561	2633.09	941.14	975.01	1109.42	408.76
scaffold1_16.5	323947	324885	sigma-70 family RNA polymerase sigma factor	339	4090.39	3621.48	3694.69	2843.42	2764.26	7657.5	7872.07	2842.78	1044.36	1372.25	1933.73
scaffold1_16.5	325232	326764	RNA polymerase sigma factor	340	519.16	601.52	536.96	467.81	478.36	1594.43	1484.7	1508.39	843.53	990.8	1490.61
scaffold1_16.5	326835	329399	beta-mannosidase	341	460.66	407.87	457.07	234.64	231.87	223.3	198.82	150.88	226.3	255.33	111.42
scaffold1_16.5	329505	330113	TetR/AcrR family transcriptional regulator	342	249.34	302.77	255.03	204.59	250.47	192.15	179.35	331.31	452.32	476.58	656.39
scaffold1_16.5	330057	331220	alpha/beta hydrolase	343	169.7	167.7	167.45	116.54	126.63	126.8	123.04	128.83	247.32	217.75	135.36
scaffold1_16.5	331407	331544	GNAT family N-acetyltransferase	344	36.41	40.07	35.89	37.59	30.89	146.39	144.47	66.79	153	111.28	26.62
scaffold1_16.5	331684	332466	hypothetical protein	345	648.18	498.46	598	386.83	337.78	136.28	147.62	131.56	192.16	297.19	147.11
scaffold1_16.5	332444	332737	hypothetical protein	346	248.87	194.91	236.7	174.73	125.77	37.03	43.21	141.07	99.43	201.88	80.93
scaffold1_16.5	332815	334089	FAD-dependent oxidoreductase	347	170.23	125.52	157.64	87.79	59.48	220.64	180.19	129.39	99.34	129.96	51.5
scaffold1_16.5	334207	334788	GNAT family N-acetyltransferase	348	1211.22	1136.34	1147.04	1402.05	1399.73	2611.66	2350.47	2399.52	771.05	942.67	938.21
scaffold1_16.5	334865	335095	hypothetical protein	349	1273.96	1306.99	1292.96	1741.74	2085.92	3817.56	3599.07	3286.75	829.76	837.69	814.09
scaffold1_16.5	335225	337384	type IIA DNA topoisomerase subunit B	350	218.07	285.05	221.58	204.41	227.49	425.41	406.87	411.18	500.78	530.79	882.83
scaffold1_16.5	337730	339049	anaerobic C4-dicarboxylate transporter	351	228.9	204.11	225.01	173.71	150.67	256.99	245.1	288.67	445.87	472.52	217.91
scaffold1_16.5	339102	340445	MFS transporter	352	143.45	155.82	145.22	165.14	142.42	261.06	262.19	207.42	393.27	418.88	216.61
scaffold1_16.5	340635	343169	DNA topoisomerase IV subunit A	353	222.43	226.18	231.97	238.01	229.24	248.21	231.9	190.91	359.91	311.91	139.47
scaffold1_16.5	343233	344099	DUF2183 domain-containing protein	354	176.6	209.98	181.95	147.1	174.77	182.03	170.73	117.68	369.48	260.18	74.85
scaffold1_16.5	344308	344970	phosphodiesterase	355	149.7	182.27	176.69	172.71	165.6	171.95	169.74	131.94	288.19	211.66	106.5
scaffold1_16.5	344967	346094	alkaline phosphatase family protein	356	94.12	123.7	106.6	106.81	113.45	86.33	86.84	240.61	320.6	239.92	205.86
scaffold1_16.5	346091	346747	thymidine kinase	357	231.82	223.69	221.71	186.54	177.8	209.61	199.28	303.61	429.8	397.11	254.75
scaffold1_16.5	346805	347884	DUF3071 domain-containing protein	358	589.7	525.28	572.02	452.97	454.04	299.27	330.16	268.06	648.64	590.54	235.51
scaffold1_16.5	348093	348389	DUF4193 domain-containing protein	359	647.34	862.7	687.43	520.31	539.9	825.18	742.62	409.24	996.21	1155.18	1181.53
scaffold1_16.5	348459	348758	DUF4235 domain-containing protein	360	1040.23	937.52	987.51	732.78	878.46	1062.63	783.18	532.47	809.58	573.21	248.51
scaffold1_16.5	348800	349318	DUF3093 domain-containing protein	361	134.46	178.15	150.15	117.7	136.73	193.73	209.1	512.77	330.28	327.84	349.3
scaffold1_16.5	349311	349769	dUTP diphosphatase	362	180.62	204.72	170.44	146.66	176.63	293.6	265.16	343.69	539.45	466.26	308.81
scaffold1_16.5	349813	350547	DUF3710 domain-containing protein	363	943.46	976.73	966.48	834.41	908.37	1499.64	1382.03	1626.57	936.18	1091.02	1434.17
scaffold1_16.5	350550	350942	OB-fold nucleic acid binding domain-containing protein	364	935.8	990.95	962.65	756.74	807.97	638.74	611.09	1237.53	893.47	1046.74	1504.69
scaffold1_16.5	351023	351682	TrkA family potassium uptake protein	365	398.25	364.04	398.61	284.93	297.19	182.38	159.13	352.49	635.67	616.86	189.75
scaffold1_16.5	351723	352400	TrkA family potassium uptake protein	366	368.32	279.76	326.7	276.03	286.72	218.64	196.49	120.23	427.7	271.64	102.28
scaffold1_16.5	352569	354593	APC family permease	367	139.51	140.92	142.45	104.9	114.97	144.19	116.32	296.69	534.15	348.96	109.3
scaffold1_16.5	354624	355805	class I SAM-dependent RNA methyltransferase	368	273.91	411.17	278.54	299.13	282.84	237.61	228.35	352.38	590.27	549.31	438.46
scaffold1_16.5	356200	358866	aconitate hydratase AcnA	369	215.43	215.13	236.52	223.25	224.31	2251.1	2266.88	211.77	365.43	369.96	300.73
scaffold1_16.5	359196	361070	1-deoxy-D-xylulose-5-phosphate synthase	370	271.48	309.65	276.96	223.65	259.28	315.52	294.14	274.17	465.32	432.22	182.71
scaffold1_16.5	361086	362324	HRDC domain-containing protein	371	615.17	752.47	621.68	483.22	503.99	504.22	496.56	547.67	494.52	515.93	349.52
scaffold1_16.5	362321	362890	DUF3000 domain-containing protein	372	1315.55	1494.45	1295.81	1153.14	1149.67	1320.56	1215.73	1070.43	556.5	650.79	558.57
scaffold1_16.5	363009	363455	peptide-methionine (R)-S-oxide reductase MsrB	373	273.62	251.84	371.87	603.8	894.3	1832.06	1957.25	1772.82	267.94	274.73	523.48
scaffold1_16.5	363662	364420	cobalamin biosynthesis protein CbiX	374	165.26	160.09	171.49	142.89	175.44	139.81	156.6	114.36	223.86	266.36	81.22
scaffold1_16.5	364684	365352	transcriptional regulator	375	152.51	161.53	166	120.29	115.64	213	189.07	127.06	310.99	303.68	57.85
scaffold1_16.5	365573	366949	tryptophanase	376	690.25	587.3	619.48	833.35	753.23	595.22	529.31	478.69	304.08	326.82	173.06
scaffold1_16.5	366954	368408	amino acid permease	377	166.57	158.78	152.99	362.48	371.82	234.15	248.69	183.6	129.53	131.65	50.44
scaffold1_16.5	368804	369658	polyphosphate kinase 2 family protein	378	528.61	505.41	483.14	483	559	353.64	312.99	195.33	199.35	177.05	47.89
scaffold1_16.5	370641	371702	NAD(P)-dependent alcohol dehydrogenase	383	258.06	219.41	253.46	173.85	178.92	115.92	125.8	183.77	351.51	400.76	268.72
scaffold1_16.5	371971	373191	sensor histidine kinase	384	101.96	92.36	112.14	71.1	71.41	33.78	37.61	95.6	204.2	168.8	59.41
scaffold1_16.5	373188	373820	response regulator transcription factor	385	62.85	63	65.62	47.42	52.69	52.36	47.31	57.94	225.49	178.1	14.5
scaffold1_16.5	373894	375963	threonine--tRNA ligase	386	410.14	434.97	398.76	398.14	363.29	375.15	365.1	492.89	539.15	560.01	665.23
scaffold1_16.5	375956	376516	HIT domain-containing protein	387	375.39	469.37	391.72	393.44	391.66	310.03	292.25	423.51	565.66	550.57	527.74
scaffold1_16.5	376509	377132	CDP-alcohol phosphatidyltransferase family protein	388	341.4	460.46	377.77	418.01	421.59	566.74	513.84	553.34	549.22	589.85	588.77
scaffold1_16.5	377172	377831	CDP-alcohol phosphatidyltransferase family protein	389	837.84	997.06	798.31	713.37	782.17	393.51	386.53	522.61	570.95	614.68	983.36
scaffold1_16.5	377852	378595	DUF881 domain-containing protein	390	516.84	683.69	520.27	441.7	487.27	280.95	282.52	438.9	689.35	833.49	1070.07
scaffold1_16.5	378638	378970	small basic family protein	391	662.85	714.85	671.14	550.66	528.88	966.97	921.65	431.02	588.7	549.56	604.35
scaffold1_16.5	378963	379715	DUF881 domain-containing protein	392	352.22	446.02	378.43	295.56	274.79	656.57	618.11	318.65	637.08	580.2	399.93
scaffold1_16.5	379780	380184	glycine cleavage system protein H	393	1371.73	1516.85	1329.27	1523.52	1807.69	764.05	738.81	1068.43	885.28	1093.28	1612.45
scaffold1_16.5	380181	380759	zinc-ribbon and FHA domain-containing protein	394	1611.6	1731.96	1572.56	1463.25	1793	1679.82	1738.53	1132.86	948.46	1064.61	1520.18
scaffold1_16.5	380759	381472	MerR family transcriptional regulator	395	825.52	1035.92	849.43	743.56	744.37	871.55	892.53	533.7	666.37	777.57	505.29
scaffold1_16.5	381503	381982	bifunctional nuclease family protein	396	534.11	547.34	510.55	526.34	517.16	932.26	881.57	438.53	574.18	594.59	418.94
scaffold1_16.5	382164	382751	MerR family transcriptional regulator	397	1375.34	950.57	1226.92	1237.22	996.67	1482.7	1303.87	952.88	836.62	959.45	1519.1
scaffold1_16.5	382805	384115	YihY/virulence factor BrkB family protein	398	379.49	319.14	366.43	248.51	249.44	383.45	386.07	668.01	458.19	378.66	242.96
scaffold1_16.5	384346	385497	MFS transporter	399	276.89	288.74	281.99	208.96	201.27	155.98	164.04	291.44	387.49	392.88	180
scaffold1_16.5	385578	386777	pyrophosphate--fructose-6-phosphate 1-phosphotransferase	400	523.24	455.33	517.09	395.77	348.9	1078.53	956.24	1133.5	858.42	963.03	1545.77
scaffold1_16.5	387055	387375	hypothetical protein	401	11.56	12.46	10.31	10.09	12.78	16.53	12.64	113.48	476.78	231.96	107.43
scaffold1_16.5	387402	388022	threonylcarbamoyl-AMP synthase	402	843.49	1102.36	860.66	946.99	1030.05	701.47	700.02	363.7	731.05	451.36	589.96
scaffold1_16.5	388082	388771	5'-methylthioadenosine/adenosylhomocysteine nucleosidase	403	278.42	364.89	303.42	274.58	275.59	167.29	161.9	312.86	664.54	491.39	438.95
scaffold1_16.5	388780	389691	NAD(+)/NADH kinase	404	164.95	205.94	168.16	153.5	139.45	126.94	135.72	231.1	409.91	314.84	169
scaffold1_16.5	389736	390386	YigZ family protein	405	61.45	70.38	66.35	50.32	51.62	70.28	74.06	254.11	284.71	321.33	327.5
scaffold1_16.5	390383	392137	FUSC family protein	406	67.38	92.09	72.14	47.33	46.82	122.2	114.33	118.13	314.31	322.03	167.57
scaffold1_16.5	392339	392901	Hsp70 family protein	407	123.61	148.81	147.3	111.41	129.26	345.39	298.72	514.37	548.86	453.95	571.96
scaffold1_16.5	392985	394001	PAC2 family protein	408	1020.91	853.45	1109.87	1394.52	1576.76	775.68	846.39	1270.29	663.69	682.49	766.85
scaffold1_16.5	394112	394318	hypothetical protein	409	447.28	350.48	413.36	329.52	352.61	190.06	240.13	164.98	764.19	804.86	244.71
scaffold1_16.5	394389	394892	peptidylprolyl isomerase	410	455.23	390.22	429.56	317.01	326.38	292.66	280.56	228.98	780.18	768.59	251.43
scaffold1_16.5	394896	395714	alpha/beta fold hydrolase	411	357.92	382.56	346.78	309.37	363.02	309.96	283.73	208.81	567.39	518.93	156.07
scaffold1_16.5	396116	396859	endonuclease NucS	412	194.29	201.36	206.87	128.09	139.36	247.51	246.54	306.89	769.96	588.17	222.92
scaffold1_16.5	396922	398259	DivIVA domain-containing protein	413	1244.12	1213.11	1153.31	1038.02	1397.55	669.48	737.26	366.75	850.52	869.47	610.71
scaffold1_16.5	398393	398851	VOC family protein	414	2411.49	1889.16	2246.38	1844.36	1639.5	1454.73	1496.57	862.24	928.16	1014.29	913.58
scaffold1_16.5	399486	401117	alpha-D-glucose phosphate-specific phosphoglucomutase	415	1002.78	811.59	979.36	778.56	751.15	467.88	474.99	209.99	725.55	531.19	220.28
scaffold1_16.5	401241	402182	tetratricopeptide repeat protein	416	609.69	699.55	597.44	501.32	515.41	779.22	840.36	1148.44	493.99	504.92	1231.07
scaffold1_16.5	402368	403123	beta-phosphoglucomutase family hydrolase	417	347.05	374.85	346.57	281.57	307.4	417.06	377.11	793.73	602.73	624.4	725.4
scaffold1_16.5	403120	405627	glycoside hydrolase family 65 protein	418	207.49	236.94	217.74	144.54	154.34	294.53	273.83	616.4	584.81	503.03	558.4
scaffold1_16.5	405724	407769	PTS glucose transporter subunit IIA	419	396.06	303.09	376.04	363.87	330.25	274.39	266.2	100.69	893.97	791.01	133.59
scaffold1_16.5	408039	408833	NUDIX hydrolase	420	228.98	269.46	219.44	185.16	184.97	197.8	178.39	324.68	469.28	497.75	333.81
scaffold1_16.5	408857	410791	1,4-alpha-glucan branching protein GlgB	421	288.93	324.62	287.04	217.38	252.72	175.3	182.98	182.74	429.68	348.51	208.78
scaffold1_16.5	410870	412168	phosphotransferase	422	197.96	233.82	207.56	158.41	175.71	176.32	170.07	583.49	312.24	319.5	178
scaffold1_16.5	412165	413937	maltose alpha-D-glucosyltransferase	423	261.25	364.15	275.6	250.33	281.84	285.13	263.47	164.03	261.25	208.46	137.83
scaffold1_16.5	413934	416162	alpha-1,4-glucan--maltose-1-phosphate maltosyltransferase	424	456.55	446.92	444.48	364.13	446.98	155.04	172.6	129.91	298.71	235.23	53.25
scaffold1_16.5	416312	418432	glycogen debranching protein GlgX	425	148.76	147.74	138.87	119.74	131.64	149.28	142.07	259.28	390.56	337.39	184.81
scaffold1_16.5	418508	419713	cysteine desulfurase	426	165.52	173.46	161.89	169.06	180.22	176.81	158.34	281.96	582.08	631.56	371.66
scaffold1_16.5	419823	420905	tRNA 2-thiouridine(34) synthase MnmA	427	160.13	168.95	156.85	129.31	127.82	110.19	117.83	264.62	503.37	427.73	372.19
scaffold1_16.5	420902	421888	methionine synthase	428	138.12	186.3	137.53	129.69	125.09	96.45	125.74	351.84	531.05	556.57	418.57
scaffold1_16.5	421899	422111	hypothetical protein	429	196.41	225.22	180.27	217.04	223.99	194.5	212.62	460.77	633.6	675.77	293.92
scaffold1_16.5	422137	422649	hypothetical protein	430	501.91	663.58	515.82	370.24	360.9	644.19	622.26	740.6	606.08	670.88	412.28
scaffold1_16.5	422656	423267	amino acid-binding protein	431	1118.15	1320.33	1133.35	1023.87	1231.77	736.7	771.98	732.82	645.88	674.82	525.29
scaffold1_16.5	423409	423732	Asp-tRNA(Asn)/Glu-tRNA(Gln) amidotransferase subunit GatC	432	982.43	865.42	947.11	684.1	760.73	478.3	488.69	316.45	430.25	430.44	394.84
scaffold1_16.5	423729	425234	Asp-tRNA(Asn)/Glu-tRNA(Gln) amidotransferase subunit GatA	433	637.58	651.8	630.74	530.95	526.53	414.2	428.92	382.68	545.97	597.86	392.64
scaffold1_16.5	425231	426724	Asp-tRNA(Asn)/Glu-tRNA(Gln) amidotransferase subunit GatB	434	541.12	598.68	531.37	435.09	448.97	629.93	614.01	597.11	599.17	596.51	779.64
scaffold1_16.5	426747	427382	TIGR03085 family protein	435	528.78	481.86	499.55	492	477.37	536.62	499.39	413.16	491.19	614.84	317.17
scaffold1_16.5	427471	427848	phosphoribosyl-AMP cyclohydrolase	436	329.47	478.53	350.51	448.54	574.23	255.22	256.62	544.49	372.64	368.19	395.05
scaffold1_16.5	427845	428162	hypothetical protein	437	348.55	446.96	361.65	329.07	354.31	376.25	348.07	568.62	351.04	306.07	474.13
scaffold1_16.5	428210	428818	Trp biosynthesis-associated membrane protein	438	302.05	377.52	317.42	395	397.99	351.24	361.9	575.71	436.03	457.53	459.12
scaffold1_16.5	428965	429180	hypothetical protein	439	809.65	707.27	733.99	849.38	877.67	1331.53	1290.53	548.67	482.83	532.44	647.1
scaffold1_16.5	429181	429981	indole-3-glycerol phosphate synthase TrpC	440	622.41	545.5	574.68	552.78	548.33	1099.7	1093.22	482.59	552.59	536.46	503.67
scaffold1_16.5	429994	431265	tryptophan synthase subunit beta	441	235.4	256.86	242.91	185.21	177.13	86.04	90.53	237.56	330.02	303.99	304.19
scaffold1_16.5	431262	432095	tryptophan synthase subunit alpha	442	321.07	417.03	327.55	255.29	298.73	126.63	131.58	353.07	165.15	189.94	184.66
scaffold1_16.5	432092	432931	prolipoprotein diacylglyceryl transferase	443	276.3	332.48	279.69	197.99	218	116.94	102.69	354.3	374.8	419.77	292.74
scaffold1_16.5	433053	437570	glutamate synthase large subunit	444	224.44	286.29	220.87	244.41	252.13	200.91	190.87	243.7	327.71	396.7	237.81
scaffold1_16.5	437563	439035	glutamate synthase subunit beta	445	162.28	196.87	156.85	177.88	193.96	151.21	144.03	383.42	664.45	795.49	540.77
scaffold1_16.5	439093	439401	hypothetical protein	446	336.43	353.21	307.75	419.38	402.11	892.89	843.17	664.57	963.96	1078.13	574.92
scaffold1_16.5	439411	441525	penicillin binding protein PBP4B	447	1770.07	1739.1	1746.22	1197.27	1179.3	402.05	386.28	289.54	641.98	609.37	228.24
scaffold1_16.5	441704	442351	DUF308 domain-containing protein	448	1259.98	1441.22	1246.96	809.98	865.62	959.19	873.36	397.94	895.47	794.53	607.26
scaffold1_16.5	442361	443242	MurR/RpiR family transcriptional regulator	449	197	212.05	204.39	138.28	139.61	282.93	251.22	99.43	408.91	389.08	121.67
scaffold1_16.5	443359	444273	N-acetylmuramic acid 6-phosphate etherase	450	261.63	160.56	238.3	455.33	299.05	293.3	299.11	84.99	438.21	322.92	393.19
scaffold1_16.5	444251	445810	PTS transporter subunit EIIC	451	86.72	60.77	75.55	72.29	67.22	98.52	88.81	58.6	248.06	182.99	232.59
scaffold1_16.5	445814	446260	hypothetical protein	452	34.77	33.14	26.87	23.45	48.61	49.45	43.89	33.92	207.25	160.81	185.04
scaffold1_16.5	446220	447185	N-acetylglucosamine kinase	453	127.89	126.92	117.23	79.69	86.69	77.39	64.81	78.33	364.12	313.7	237.65
scaffold1_16.5	447182	448192	Tat (twin-arginine translocation) pathway signal sequence	454	989.64	866.89	910.54	657.65	702.01	1085.42	971.88	563.77	759.05	717.37	437.63
scaffold1_16.5	448189	449619	glycoside hydrolase family 1 protein	455	958.05	739.16	914.92	510.21	478.09	586.17	536.48	353.86	689.56	564.19	338.48
scaffold1_16.5	449647	449958	PTS sugar transporter subunit IIB	456	637.05	535.11	654.33	378.72	315.53	488.22	465.16	300.17	696.18	586.78	242.74
scaffold1_16.5	449955	451233	PTS sugar transporter subunit IIC	457	528.05	410.84	506.5	265.11	211.17	224.5	220.23	127.31	509.22	428.17	194.13
scaffold1_16.5	451230	451595	PTS lactose/cellobiose transporter subunit IIA	458	255.95	216.28	254.93	99.24	129.34	66.87	52.86	75.76	378.36	316.29	394.46
scaffold1_16.5	452229	452428	hypothetical protein	459	85.86	74.88	71.87	48.49	48.03	34.29	34.86	48.23	112.82	140.57	36.68
scaffold1_16.5	452490	456062	DNA polymerase III subunit alpha	460	280.15	331.79	278.92	218.15	226.23	428.29	407.32	350.6	718.46	742.81	312.9
scaffold1_16.5	456083	456613	hypothetical protein	461	353.07	346.49	340.58	245.91	221.78	358.03	361.51	466.13	843.69	935.42	454.53
scaffold1_16.5	456618	457937	histidinol dehydrogenase	462	622.83	594.44	606.46	505.08	474.59	472.98	439.78	451.8	758.04	823.84	679.06
scaffold1_16.5	457970	459100	histidinol-phosphate transaminase	463	613.54	646.21	625.21	520.44	551.7	582.23	556.21	314.1	469.3	441.61	443.05
scaffold1_16.5	459097	459717	imidazoleglycerol-phosphate dehydratase HisB	464	367.13	452.83	394.49	307.53	345.95	216.35	214.59	317.09	409.98	389.13	552.81
scaffold1_16.5	459710	460327	imidazole glycerol phosphate synthase subunit HisH	465	270.69	351.29	273.06	236.06	276.24	225.96	241.77	230.91	401.31	379.93	488.03
scaffold1_16.5	460340	461107	bifunctional 1-(5-phosphoribosyl)-5-((5- phosphoribosylamino)methylideneamino)imidazole-4- carboxamide isomerase/phosphoribosylanthranilate isomerase PriA	466	197.25	260.45	200.93	163.57	154.01	294.89	278.97	749.5	466.02	531.63	851.1
scaffold1_16.5	461257	462051	YebC/PmpR family DNA-binding transcriptional regulator	467	1449.22	1438.1	1401.47	1164.71	1203.13	1435.05	1491.86	2060.06	957.53	1099.9	2705.03
scaffold1_16.5	462093	462638	crossover junction endodeoxyribonuclease RuvC	468	811.94	873.72	860.11	711.67	720.26	482.1	490.81	1280.18	832.71	1004.39	1440.68
scaffold1_16.5	462635	463240	Holliday junction branch migration protein RuvA	469	333.46	436.03	369.87	295.97	271.59	214.77	214.77	617.11	622.25	606.56	805.29
scaffold1_16.5	463288	464316	Holliday junction branch migration DNA helicase RuvB	470	479.68	691.43	510.87	544.29	541.64	1021.31	959.24	840.1	622.09	703.74	1255.12
scaffold1_16.5	464341	464808	preprotein translocase subunit YajC	471	676.68	796.32	667.05	502.04	511.11	1226.16	1190.55	732.94	847.39	896.14	830.15
scaffold1_16.5	464881	466539	protein translocase subunit SecD	472	530.57	588.94	544.08	325.39	326.07	692.21	633.38	445.99	766.28	796.92	452.76
scaffold1_16.5	466541	467728	protein translocase subunit SecF	473	521.11	653.99	513.92	330.26	349.99	789.59	725.69	634.43	690.55	715.24	481.81
scaffold1_16.5	467725	468258	adenine phosphoribosyltransferase	474	345.75	400.7	340.79	248.41	215.66	801.41	790.34	450.75	680.3	631.24	567.09
scaffold1_16.5	468261	469355	potassium channel family protein	475	190.7	246.94	224.16	146.61	151.75	265.53	251.44	330.84	587.93	643.94	319.82
scaffold1_16.5	469485	471809	bifunctional (p)ppGpp synthetase/guanosine-3',5'-bis(diphosphate) 3'-pyrophosphohydrolase	476	447.27	556.05	431.51	494.07	565.99	729.19	688.64	389	531.19	496.95	383.88
scaffold1_16.5	471874	473172	DUF349 domain-containing protein	477	585.73	485.93	574.09	437.1	413.25	766.08	664.64	908.34	756.37	688.73	781.74
scaffold1_16.5	473150	473821	MBL fold metallo-hydrolase	478	214.53	211.74	218.3	159.43	164.02	106.91	93.76	98.15	227.54	186.55	68.58
scaffold1_16.5	473921	475285	histidine--tRNA ligase	479	443.48	425.27	454.47	394.37	371.45	291.09	284.82	414.68	550.87	510.37	430.66
scaffold1_16.5	475341	476033	DUF998 domain-containing protein	480	514.08	631.73	523.19	419.45	364.7	403.58	347.44	539.47	898.37	951.71	584.56
scaffold1_16.5	476026	476589	GNAT family N-acetyltransferase	481	577.58	682.13	598.38	400.82	475.72	331.84	296.26	806.31	806.1	896.63	848.88
scaffold1_16.5	476623	481056	2-hydroxyacyl-CoA dehydratase	482	202.73	204.79	211.27	141.5	183.2	198.44	181.39	136.31	115.59	142.27	55.27
scaffold1_16.5	481212	481784	TetR family transcriptional regulator	483	279.91	359.12	303.04	296.62	314.03	362.14	354.77	205.57	552.07	410.36	182.9
scaffold1_16.5	481904	482974	glycosyltransferase family 1 protein	484	1059.64	970.32	1007.91	763.91	857.43	419.22	398.69	220.22	434.52	342.21	214.15
scaffold1_16.5	483114	484934	aspartate--tRNA ligase	485	1442.45	1105.08	1418.97	1286.3	1068.31	770.46	715.66	510	674.01	677.39	796.06
scaffold1_16.5	485043	485437	AAA family ATPase	486	423.77	403.52	457.13	426.06	309.23	280.8	242.08	234.51	468.49	542.53	400.26
scaffold1_16.5	485565	486411	replication-associated recombination protein A	487	164.23	217.94	180.83	150.62	167.07	131.45	138.85	144.8	355.08	360.82	291.62
scaffold1_16.5	486408	486866	DUF948 domain-containing protein	488	182.87	257.64	187.9	150.36	177.52	379.74	352.76	252.74	404.97	348.64	485.21
scaffold1_16.5	487011	489689	alanine--tRNA ligase	489	1034.5	984.61	1003.55	743.2	750.15	849.81	862.74	1084.38	723.62	803.11	1256.93
scaffold1_16.5	489725	490168	Holliday junction resolvase RuvX	490	680.81	805.32	690.17	688.4	641.86	321.39	357.85	933.59	689.43	806.72	1003.94
scaffold1_16.5	490165	491274	endolytic transglycosylase MltG	491	783.15	762.37	754.07	450.83	484.26	634.05	534.36	793.89	773.8	732.88	658.48
scaffold1_16.5	491306	492112	shikimate dehydrogenase	492	233.03	244.27	223.58	179.75	162.02	282.39	237.4	496.34	394.08	430.74	525.02
scaffold1_16.5	492126	493322	chorismate synthase	493	209.9	236.51	207.39	145.98	146.56	104.51	101.78	295.24	425.19	445.82	414.99
scaffold1_16.5	493319	493828	shikimate kinase	494	158.31	190.19	154.11	115.21	138.83	54.51	50.1	397.9	333.25	351.3	352.98
scaffold1_16.5	493825	494910	3-dehydroquinate synthase	495	131.14	143.17	118.75	85.48	86.5	119.76	126.88	361.38	352.59	329.88	206
scaffold1_16.5	495053	496072	CapA family protein	496	200.45	209	186.34	163.67	157.38	150.25	144.01	166.89	498.83	525.36	212.73
scaffold1_16.5	496080	496298	hypothetical protein	497	402.33	351.06	391.08	341.19	346.32	137.23	147.45	175.48	585.66	553.52	239.25
scaffold1_16.5	496295	497245	polyphosphate kinase 2	498	177.19	210.64	178.53	128.83	168.42	156.19	130.72	166.99	437.16	475.79	276.4
scaffold1_16.5	497522	498091	elongation factor P	499	1667.86	1654.38	1680.33	1772.71	1655.46	3232.56	3229.89	1434.55	790.54	786.01	1050.98
scaffold1_16.5	498088	498873	transcription antitermination factor NusB	500	823.11	839.2	866.5	791.25	650.54	1820.95	1722.95	1305.52	631.37	676.65	1267.38
scaffold1_16.5	498968	499288	30S ribosomal protein S13	501	646.92	909.87	726.47	826.41	791.59	738.55	694.84	808.52	619.75	543.91	628.84
scaffold1_16.5	499344	499943	guanylate kinase	502	476.77	578.55	485.5	435.27	554.62	621.87	646.15	269.74	627.9	579.07	291.23
scaffold1_16.5	499964	500311	DNA-directed RNA polymerase subunit omega	503	1298.06	1434.25	1294.43	1041.58	1073.39	789.63	836.03	581.99	858.8	852.65	662.22
scaffold1_16.5	500324	501556	bifunctional phosphopantothenoylcysteine decarboxylase/phosphopantothenate--cysteine ligase CoaBC	504	531.69	681.37	555.93	447.14	415.61	791.92	741.92	654.36	794.82	856.42	1050.91
scaffold1_16.5	501596	502789	methionine adenosyltransferase	505	193.64	275.66	204.69	147.9	134.79	313.94	306.88	609.34	685.67	618.57	819.94
scaffold1_16.5	502828	504846	primosomal protein N'	506	460.94	503.6	439.6	446.93	452.14	300.31	256.64	379.3	415.38	473.82	368.04
scaffold1_16.5	504865	505812	methionyl-tRNA formyltransferase	507	566.09	639.48	551.07	388.97	458.17	405.6	357.09	417.82	551.86	520.94	566.9
scaffold1_16.5	505809	507185	rRNA cytosine-C5-methylase	508	301.44	314.41	303.22	266.32	282.87	279.45	262.36	381.74	395.49	431.77	414.83
scaffold1_16.5	507325	508095	hypothetical protein	509	912.44	719.8	928.49	506.81	499.62	1172.75	984.19	334.18	636.03	596.04	821.47
scaffold1_16.5	508376	509221	CAMP factor family pore-forming toxin	510	1589.68	1144.81	1614.72	1676.39	1279.94	292.58	292.78	165.16	623.17	540.12	116.8
scaffold1_16.5	509401	510072	ribulose-phosphate 3-epimerase	511	320.44	288.56	304.12	268.08	217.7	599.23	524.82	138.12	461.38	409.14	97.16
scaffold1_16.5	510089	510982	PAC2 family protein	512	223.31	219.14	209.84	186.3	190.79	84.86	81.86	200.34	406.47	416.03	186.85
scaffold1_16.5	510979	511191	hypothetical protein	513	3.19	2.96	3.76	2.38	1.51	7.63	8.15	26.2	14.45	12.99	6
scaffold1_16.5	511380	513017	HAD-IA family hydrolase	514	280.72	238.31	272.09	271.49	247.33	222.16	220.35	368.48	425.53	450.6	190.74
scaffold1_16.5	513092	513481	DUF3054 domain-containing protein	515	145.35	164.49	148.6	110.55	104.08	316.9	266.44	411.98	385.83	610.13	1112.01
scaffold1_16.5	513478	515664	YhgE/Pip domain-containing protein	516	276.6	336.54	281.65	116.33	126.87	594.03	504.55	241.08	365.22	470.28	686.69
scaffold1_16.5	515668	516573	ATP-binding cassette domain-containing protein	517	283.58	390.82	293.11	157.93	177.39	488.58	424.88	292.38	338.8	579.56	748.98
scaffold1_16.5	516573	517193	TetR/AcrR family transcriptional regulator	518	239.21	326.71	263.57	186.16	204.29	765.04	779.96	313.61	417.33	589.46	890
scaffold1_16.5	517339	518175	proteasome subunit beta	519	349.97	327.83	317.94	236.8	243.91	176.56	153.15	640.37	589.36	779.53	623.9
scaffold1_16.5	518665	519936	prephenate dehydrogenase	520	187.54	194.03	181.18	132.17	145.73	288.95	245.92	275.16	364.98	528.7	276.25
scaffold1_16.5	519999	520670	(d)CMP kinase	521	111.01	155.5	118.94	103.84	119.91	202.35	148.15	214.51	370.36	436.75	158.79
scaffold1_16.5	520735	522105	ribosome biogenesis GTPase Der	522	211.45	269.84	219.67	173.8	206.54	317.46	292.15	457.49	632.21	639.86	395.38
scaffold1_16.5	522733	523647	ribokinase	524	66.9	83.17	67.37	41.91	48.61	125.18	108.92	58.43	206.76	166	29.62
scaffold1_16.5	523661	524722	aldose 1-epimerase family protein	525	32.17	46.82	33.92	21.46	20.56	42.71	36.21	51.03	72.33	55.97	14.46
scaffold1_16.5	524709	526142	L-fucose:H+ symporter permease	526	22.58	30.93	21.95	13.18	15.66	41.01	38.89	65.94	55.71	32.76	8.34
scaffold1_16.5	526139	526792	deoxyribose-phosphate aldolase	527	67.48	76.24	60.86	88.54	97.98	228.88	258.85	154.36	187.32	192.2	41.69
scaffold1_16.5	526894	527805	sugar-binding protein	528	66.62	89.75	75.07	94.84	82.22	322.31	266.16	159.89	194.4	126.51	60.35
scaffold1_16.5	528021	528869	HAD family hydrolase	529	124.63	125.77	133.49	104.53	123.58	157	157.74	107.24	391.11	311.2	109.17
scaffold1_16.5	528880	530097	acetyl-CoA hydrolase	530	67.44	79.44	75.26	35.01	33.88	44.27	38.71	133.86	269.42	199.42	36.36
scaffold1_16.5	530182	530466	polyhydroxyalkanoate synthase	531	278.44	439.12	315.95	278.39	242.5	1591.26	1652.56	231.6	146.42	136.29	105.14
scaffold1_16.5	530770	531390	methyltransferase domain-containing protein	532	234.95	334.47	264.8	271.87	253.49	279.05	249.34	176.15	252.09	264.33	117.85
scaffold1_16.5	531387	531878	AsnC family transcriptional regulator	533	322.35	377.03	310.51	233.51	240.29	171.29	168.66	146.01	203.47	182.33	124.12
scaffold1_16.5	531875	533464	apolipoprotein N-acyltransferase	534	187.33	247.86	193.57	154.3	143.28	114.25	114.69	114.08	281.81	287.12	122.83
scaffold1_16.5	533445	534263	polyprenol monophosphomannose synthase	535	839.13	768.99	800.15	610.73	624	712.95	640.43	782.27	1088.01	1182.61	761.55
scaffold1_16.5	534318	534650	RNA polymerase-binding protein RbpA	536	1107.81	1160.05	1033.32	943.07	1202.67	2537.18	2438.96	1651.54	1217.95	1530.57	1657.98
scaffold1_16.5	534812	535606	glycerophosphodiester phosphodiesterase	537	377.68	336.99	349.94	247.9	241.53	197.45	197.87	174.21	501.62	321.05	75.07
scaffold1_16.5	535673	536551	pyridoxal kinase	538	1188.75	1299	1133.2	956.34	932.72	699.79	722.03	586.92	780.73	764.02	650.91
scaffold1_16.5	536488	538014	UDP-N-acetylglucosamine 1-carboxyvinyltransferase	539	1036.93	936.14	989.2	634.54	680.23	1182.24	1032.23	558.22	669.69	673.24	279.7
scaffold1_16.5	538164	539567	dihydrolipoyl dehydrogenase	540	1228.34	1015.04	1165.67	772.71	821.96	477.25	426	873.24	555.8	611.3	1554.01
scaffold1_16.5	539662	540576	cation transporter	541	448.07	396.7	429.96	279.97	273.64	314.17	275.33	240.79	315.33	433.26	347.56
scaffold1_16.5	540570	540989	winged helix-turn-helix transcriptional regulator	542	365.48	346.34	356.7	251.27	284.21	265.71	248.49	163.87	325.98	391.86	91.06
scaffold1_16.5	541205	541939	hypothetical protein	543	363.93	354.83	355.09	259.51	266.58	943.85	800.26	532.91	644.46	513.98	211.29
scaffold1_16.5	542104	542889	CAMP factor pore-forming toxin 4	544	261.41	195.65	213.28	592.33	452.37	430.18	358.65	659.92	948.25	1034.38	15.37
scaffold1_16.5	543390	543818	aminoacyl-tRNA hydrolase	545	84.52	86.27	86.31	69.46	65.86	119.49	112.47	586.86	445.6	489.32	369.4
scaffold1_16.5	544009	545205	MFS transporter	546	116.62	110.95	115.9	80.6	76.04	70.86	69.19	210	182.18	155.19	75.09
scaffold1_16.5	545208	545552	MarR family transcriptional regulator	547	151.64	135.54	144.34	133.64	159.99	108.76	97.55	222.94	155.37	49.5	67.22
scaffold1_16.5	545761	546028	hypothetical protein	548	81.87	67.04	78.99	65.19	74.73	70.82	42.64	82.05	50.55	32.91	2.17
scaffold1_16.5	546031	546867	uracil-DNA glycosylase	549	76.36	70.79	78.21	65.08	64.21	53.67	57.88	63.45	158.69	218.4	17.45
scaffold1_16.5	547030	547695	cob(I)yrinic acid a,c-diamide adenosyltransferase	550	555.58	746.03	587.61	444.3	470.79	1816.27	1658.56	611.02	542.82	450.13	573.93
scaffold1_16.5	547696	548208	DUF2550 domain-containing protein	551	805.47	1139.71	905.2	1146.25	1324.4	801.62	793.17	802.95	538.43	561.65	856.54
scaffold1_16.5	548323	548763	F0F1 ATP synthase subunit epsilon	552	1018.32	1005.09	1005.9	929.11	865.86	1400.31	1282.85	1620.7	760.09	836.58	1502.08
scaffold1_16.5	548769	550223	F0F1 ATP synthase subunit beta	553	1490.11	1256.95	1450.81	1167.28	1110.17	1040.05	1102.31	1141.47	616.59	528.52	1074.42
scaffold1_16.5	550235	551179	F0F1 ATP synthase subunit gamma	554	1282.09	1099.03	1196.49	1048.85	1025.84	974.18	940.55	1030.36	632.52	597.57	932.87
scaffold1_16.5	551183	552820	F0F1 ATP synthase subunit alpha	555	1494.14	1256.46	1460.03	1160.37	1011.96	865.64	869.41	1258.47	755.75	751.58	1446.1
scaffold1_16.5	552874	553665	F0F1 ATP synthase subunit delta	556	1770.01	1534.99	1643.23	1282.76	1195.79	463.43	462.23	1584.8	761.32	792.82	1778.4
scaffold1_16.5	553662	554216	F0F1 ATP synthase subunit B	557	2191.03	1800.24	2018.32	1590.56	1475.98	1215.45	1153.69	1784.26	833.25	852.72	2089.8
scaffold1_16.5	554227	554448	ATP synthase F0 subunit C	558	1623.37	1366.14	1568.65	1177.12	954.22	707.53	741.21	1292.63	515.46	527.1	963.87
scaffold1_16.5	554538	555314	F0F1 ATP synthase subunit A	559	1763.33	1669.93	1696.11	1097.09	1079.56	758.88	697.43	906.86	284.6	321.8	620.36
scaffold1_16.5	555311	555589	AtpZ/AtpI family protein	560	1395.21	1502.54	1273.25	1134.86	1221.9	1273.75	1146.58	1155.11	739.2	873.03	1291.29
scaffold1_16.5	555604	556089	cyanate permease	561	205.13	250.45	198.55	169.44	171.57	235.53	199.85	394.02	483.22	499.78	179.45
scaffold1_16.5	556249	557352	undecaprenyl/decaprenyl-phosphate alpha-N-acetylglucosaminyl 1-phosphate transferase	562	318.04	393.79	320.78	226.79	241.16	220.91	182.41	362.94	408.74	357.9	337.63
scaffold1_16.5	557361	558233	threonylcarbamoyl-AMP synthase	563	394.59	536.29	406.93	366.72	442.53	302.57	277.76	725.85	682.16	598.66	895.74
scaffold1_16.5	558217	559092	peptide chain release factor N(5)-glutamine methyltransferase	564	138.59	198.75	164.66	106.42	110.48	128.17	104.94	297.58	352.86	291.99	321.68
scaffold1_16.5	559092	560177	peptide chain release factor 1	565	293.4	344.81	295.66	193.59	196.15	104.17	104.62	468.67	499.73	558.7	386.18
scaffold1_16.5	560297	560506	50S ribosomal protein L31	566	1547.56	1195.1	1446.85	1349.01	2284.19	834.48	662.61	1889.93	947.28	1166.39	2509.17
scaffold1_16.5	560623	562524	transcription termination factor Rho	567	410.77	643.99	461.2	405.08	395.94	1561.45	1444.71	1723.93	778.56	993.36	1732.21
scaffold1_16.5	562823	563713	homoserine kinase	568	204.48	228.71	202.77	183.53	164.27	206.45	176.05	286.27	329.9	433.58	343.79
scaffold1_16.5	563724	564800	threonine synthase	569	260.16	264.38	257.56	223.61	205.32	329.44	300.66	333.49	449.38	519.79	511.17
scaffold1_16.5	564797	566122	homoserine dehydrogenase	570	259.33	286.12	274.06	212.67	191.9	251.13	257.85	311.31	367.15	436.22	470.8
scaffold1_16.5	566193	567623	diaminopimelate decarboxylase	571	285.52	377.21	283.57	273	269.26	189.49	172.62	325.87	404.57	477.7	660.81
scaffold1_16.5	567970	569187	DUF2029 domain-containing protein	573	148.52	148.15	152.01	109.56	110.14	238.3	204.82	170.61	521.9	468.93	126.3
scaffold1_16.5	569374	573084	multifunctional oxoglutarate decarboxylase/oxoglutarate dehydrogenase thiamine pyrophosphate-binding subunit/dihydrolipoyllysine-residue succinyltransferase subunit	574	633.69	451.85	623.9	370.62	338.19	420.61	369.87	134.42	337.56	328.82	176.31
scaffold1_16.5	573140	573328	hypothetical protein	575	366.65	411.27	376.38	343.47	348.33	244.41	217.8	119.49	348.78	335.86	80.13
scaffold1_16.5	573380	573778	hypothetical protein	576	621.03	630.73	595.74	591.19	631.2	256.21	230.13	169.3	543.79	473.83	127.31
scaffold1_16.5	574060	574311	WhiB family transcriptional regulator	577	579.69	925.3	645.81	972.2	1228.92	536.88	629.07	1181.45	1205.34	1391.95	1092.2
scaffold1_16.5	574341	575816	sensor histidine kinase	578	201.76	247.96	221.27	214.43	216.58	313.4	306.99	501.34	644.25	547.59	309.63
scaffold1_16.5	576161	576427	mycothiol system anti-sigma-R factor	579	324.66	417.29	380.31	372.1	493.1	1807.83	1679.26	5842.4	1243.11	1375.55	6315.29
scaffold1_16.5	576424	577128	sigma-70 family RNA polymerase sigma factor	580	639.06	761.43	742.22	774.49	986.73	2656.91	2472.51	5838.21	1073.37	1191.67	5695.33
scaffold1_16.5	577319	577951	DoxX family membrane protein	581	1136.66	854.34	1165.32	809.54	744.05	541.54	587.68	744.78	898.46	968.53	591.05
scaffold1_16.5	577941	579230	3-phosphoshikimate 1-carboxyvinyltransferase	582	475.44	532.1	509.23	416.61	384.67	484.8	443.89	317.87	669.88	681.42	323.26
scaffold1_16.5	579232	580233	ribosome small subunit-dependent GTPase A	583	303.69	380.91	327.33	277.11	285.54	575.67	582.38	176.01	530.94	486.08	140.21
scaffold1_16.5	580254	580918	hypothetical protein	584	47.89	72.77	55.39	51.78	54.56	130.74	114.62	72.46	256.51	299.24	42.16
scaffold1_16.5	581295	582083	histidinol phosphatase	585	604.92	665.93	574.33	566.82	614.78	647.17	616.88	401.85	573.07	656.06	507.89
scaffold1_16.5	582127	583317	phosphoglycerate dehydrogenase	586	377.83	473.05	367.15	308.61	335.05	250.72	225.94	279.21	563.69	613.01	391.83
scaffold1_16.5	583364	584149	ABC transporter ATP-binding protein	587	219.27	248.67	219.27	192.48	190.98	429.62	375.38	320.06	518.55	396.11	430.82
scaffold1_16.5	584149	584958	ABC transporter ATP-binding protein	588	180.43	203.25	179.68	170.76	158.36	272.6	253.79	298.13	562.6	490.82	543.89
scaffold1_16.5	584958	585770	ABC transporter permease	589	244.82	253.99	248.94	226.77	199.26	258.17	260.4	311.32	555.29	424.94	548.04
scaffold1_16.5	585767	586744	ABC transporter permease	590	293.53	338.59	295.83	240.81	252.57	462.69	417.51	223.59	583.76	374.86	401.29
scaffold1_16.5	586741	588228	ABC transporter substrate-binding protein	591	357.72	342.84	337.81	315.48	326.06	372.89	347.96	271.41	604.32	397.61	350.93
scaffold1_16.5	588457	588729	transcriptional regulator	593	168.62	137.93	135.42	249.13	252.29	519.19	588.85	227.69	570.89	649.44	232.98
scaffold1_16.5	588769	588924	helix-turn-helix domain-containing protein	594	115.42	89.58	102.64	69.12	71.74	94.59	77.34	56.69	101.09	116.31	58.7
scaffold1_16.5	588921	589475	hypothetical protein	595	50.73	37.29	40.23	27.83	27.11	37.71	28.47	59.31	200.12	249.86	18.6
scaffold1_16.5	590114	590509	SreG protein-coupled chemoreceptor family protein	596	277.28	353.17	250.18	236.55	273.36	126.54	103.36	285.86	361.66	372.12	185.62
scaffold1_16.5	590855	591268	XRE family transcriptional regulator	597	189.21	129.02	186.23	79.49	84.31	679.31	737.83	134.54	229.13	253.46	59.11
scaffold1_16.5	591469	591726	hypothetical protein	598	129.17	98.35	118.33	97.54	76.89	138.13	140.25	55.1	123.11	137.23	56.64
scaffold1_16.5	591723	592307	ParA family protein	599	133.17	116.05	127.35	123.32	103.35	604.43	582.63	76.27	191.06	225.9	101.99
scaffold1_16.5	592681	593502	DUF929 family protein	600	902.79	842.43	858.98	441.44	377.38	808.95	751.07	324.78	488.03	413.89	1859.87
scaffold1_16.5	593662	593874	hypothetical protein	601	54.1	48.9	39.2	24.64	26.67	96.77	85.41	64.7	105.25	87.2	28.49
scaffold1_16.5	593915	594153	hypothetical protein	602	72.86	64.64	60.41	29.97	36.38	73.78	79.02	213.08	131.9	134.26	94.37
scaffold1_16.5	594212	594337	toxin-antitoxin system toxin subunit	603	44.21	44.56	41.99	11.71	30.11	35.41	41.89	123.43	142.96	98.38	33.51
scaffold1_16.5	594801	595952	MFS transporter	604	224.4	211.74	216.99	67.73	69.39	226.15	224.3	98.04	205	86.05	45.69
scaffold1_16.5	596610	597917	ATP-grasp domain-containing protein	605	715.38	612.96	652.05	221.76	251.19	747.21	685.1	236.17	494.99	253.63	124.68
scaffold1_16.5	597904	598617	thioesterase	606	794.49	630.62	748.21	226.19	250.37	554.42	524.39	182.28	378.13	155.15	99.5
scaffold1_16.5	598614	600065	non-ribosomal peptide synthetase	607	883.65	711.74	823.69	207.46	208.93	683.37	587.39	139.3	470.42	205.22	65.68
scaffold1_16.5	600376	603672	non-ribosomal peptide synthetase	608	986.43	740.52	922.77	219.22	219.96	951.9	833.31	99.43	408.69	135.54	43.28
scaffold1_16.5	603680	604669	2,3-diaminopropionate biosynthesis protein SbnB	609	1463.01	1088.37	1391.31	347.23	376.73	1661.04	1483.54	148.15	533.71	194.37	60.73
scaffold1_16.5	604670	605671	2,3-diaminopropionate biosynthesis protein SbnA	610	1138.99	909.97	1057.43	361.39	347.82	1143.82	1022.63	179.89	690.95	335.61	98.3
scaffold1_16.5	605862	606686	4'-phosphopantetheinyl transferase superfamily protein	611	366.42	335.72	343.06	117.56	111.81	376.72	349.6	102.3	338.11	153.4	24.25
scaffold1_16.5	606786	606985	hypothetical protein	612	728.31	585.32	669.15	236.28	252.85	318.7	274.42	137.04	332.43	236.72	29.19
scaffold1_16.5	606952	607161	hypothetical protein	613	894.69	737.4	854.09	337.52	363.02	345.13	314.75	147.05	313.57	163.27	21.09
scaffold1_16.5	608401	609198	helix-turn-helix domain-containing protein	614	112.12	116.99	111.9	86.18	87.81	26.55	33.34	86.87	144.48	128.27	58.35
scaffold1_16.5	609191	610897	hypothetical protein	615	192.91	160.78	190.36	138.93	127.2	69.56	85.9	41.8	48.83	57.17	11.95
scaffold1_16.5	610894	611415	hypothetical protein	616	178.27	133.35	169.32	113.6	111.87	29	37.8	78.08	75.45	97.21	5.15
scaffold1_16.5	611485	612045	GNAT family N-acetyltransferase	617	89.18	80.86	84.44	46.7	34.34	36.8	28.66	104.2	212.61	208.48	39.04
scaffold1_16.5	612042	612656	hypothetical protein	618	125.87	112.32	119.89	72.88	68.2	40.99	35.91	85.13	232.13	210.03	48.69
scaffold1_16.5	612685	612933	hypothetical protein	619	8.17	5.34	8.02	5.39	5.07	10.06	16.56	80.37	21.54	22.41	3.45
scaffold1_16.5	612950	613531	hypothetical protein	620	8.05	5.75	9.06	5.92	10.64	6.21	6.04	99.61	43.43	47.82	5.86
scaffold1_16.5	613595	614092	hypothetical protein	621	45.57	25.8	38.24	43.69	41.87	57	77.51	107.83	124.22	193.12	49.35
scaffold1_16.5	614296	614886	hypothetical protein	622	12.5	12.09	17.05	16.87	21.81	23.4	27.97	62.93	79	83.98	11.05
scaffold1_16.5	615794	615953	amidase	623	15.48	27.56	11.27	19.05	33.27	211.81	275.98	26.28	215.45	153.94	5.25
scaffold1_16.5	616094	616455	CopG family transcriptional regulator	624	22.59	30.44	23.39	21.3	20.77	352.82	320.58	119.96	203.62	136.71	23.76
scaffold1_16.5	616743	617195	hypothetical protein	625	165.97	239.07	169.66	142.92	199.68	323.38	310.92	350.56	360.96	296.46	250.97
scaffold1_16.5	617586	618071	universal stress protein	626	69.07	76.77	69.98	62.73	59.39	162.92	156.22	247.2	424.46	347.43	177.88
scaffold1_16.5	618247	618810	hypothetical protein	627	170.21	251.25	184.53	171.4	186.52	271.36	238.9	552.87	710.9	712.15	516.24
scaffold1_16.5	618807	619955	PDZ domain-containing protein	628	331.46	354.21	312.53	279.84	313.92	414.96	379.72	600.1	768.34	702.38	651.64
scaffold1_16.5	620042	621403	zinc-dependent metalloprotease	629	583.13	611	551.89	441.97	518.73	467.49	466.84	320.04	730.69	650.09	396.17
scaffold1_16.5	621391	622017	M48 family metallopeptidase	630	231.95	299.85	221.62	241.85	272.65	479.15	408.29	376.35	671.19	656.84	390.63
scaffold1_16.5	622202	623101	hypothetical protein	631	56.51	91.3	64.54	73.44	50.19	121.92	122.74	105.78	213.57	210.15	72.6
scaffold1_16.5	623047	625167	ATP-dependent DNA helicase UvrD2	632	107.16	141.5	107.99	107.07	135.84	93.77	76.17	258.05	378.51	359.03	248.99
scaffold1_16.5	625292	628441	exodeoxyribonuclease V subunit gamma	633	299.71	315	282.77	301.53	361.05	216.75	198.68	117.15	283.75	276.22	94.29
scaffold1_16.5	628438	631674	UvrD-helicase domain-containing protein	634	215.99	247.1	214.68	175.61	200.5	155.53	137.4	129.92	248.54	254.68	101.48
scaffold1_16.5	631667	633553	exodeoxyribonuclease V subunit alpha	635	196.59	258.86	204.52	173.47	192.64	264.04	232.94	155.22	286.91	296.29	164.21
scaffold1_16.5	633584	634486	NAD(+) diphosphatase	636	137.39	162.06	137.52	117.76	108.38	140.7	118.16	203.84	265.56	250.86	141.93
scaffold1_16.5	634523	637738	ATP-dependent helicase	637	88.49	112.39	94.19	84.8	94.13	183.93	172.06	390.13	366.32	317.13	248.45
scaffold1_16.5	637735	640920	ATP-dependent helicase	638	91.2	116.3	95.88	90.5	100.62	219.67	186.57	504.6	422.68	367.19	353.29
scaffold1_16.5	641187	642044	protein serine/threonine phosphatase 2C family protein	639	122.3	157.67	135.92	116.45	126.71	297.13	272.07	333.04	356.12	348.41	209.62
scaffold1_16.5	642066	642293	DUF3107 domain-containing protein	640	826.11	929.84	840.64	837.61	952.4	1662.59	1767.37	473.42	970.14	928.63	366.42
scaffold1_16.5	642334	642900	hypothetical protein	641	799.64	909.06	797.88	687.26	715.45	632.57	615.09	470.59	756.21	819.6	505.09
scaffold1_16.5	643031	644716	DEAD/DEAH box helicase	642	409.82	521.19	440.93	302.63	309.93	885.55	869.35	370.67	642.14	673.06	130
scaffold1_16.5	644855	646366	amino acid permease	643	464.84	582.63	470.22	268.6	258.82	286.34	260.85	163.49	475.49	510.47	196.48
scaffold1_16.5	646430	647521	tryptophan--tRNA ligase	644	376.11	421.31	393.59	317.1	336.58	515.39	457.87	279.45	447.02	413.88	317.35
scaffold1_16.5	647666	648520	PHP domain-containing protein	645	334.61	346.34	320.35	345.65	443.45	246.83	233.48	170.23	284.37	325.83	645.34
scaffold1_16.5	648523	653194	NAD-glutamate dehydrogenase	646	488.38	369.82	451.1	399.09	414.1	281.43	258.39	131.44	319.54	323.3	433.07
scaffold1_16.5	653286	653759	DUF2505 domain-containing protein	647	267.13	221.53	274.79	236.44	212.09	241.71	216.19	149.76	688.18	664.58	121.09
scaffold1_16.5	653792	654325	hypothetical protein	648	682.31	636.27	606.44	719.72	724.72	1003.14	759.06	639.9	849.35	867.45	744.29
scaffold1_16.5	654470	654994	hypothetical protein	649	224.23	224.05	221.53	211.31	175.55	355.51	313.87	333.5	665.63	823.27	267.08
scaffold1_16.5	655037	657733	preprotein translocase subunit SecA	650	804.89	914.36	799.54	653.82	719.32	708.07	644.25	1178.72	923.92	1001.65	1115.84
scaffold1_16.5	657928	658575	ribosome-associated translation inhibitor RaiA	651	1237.91	966.28	1082.83	2082.79	1755.3	2575.84	2569.54	1242.36	903.96	992.01	1493.51
scaffold1_16.5	658767	659261	ComF family protein	652	294.86	327.19	285.82	432.83	567.24	507.29	576.96	174.85	308.4	392.81	52.85
scaffold1_16.5	659456	661144	GerMN domain-containing protein	653	83.3	95.56	86.26	68.82	74.59	29.97	27.35	153.3	141.88	135.6	58.63
scaffold1_16.5	661228	662706	HAMP domain-containing histidine kinase	654	113.79	130.43	120.01	98.94	89.41	151.72	154.3	152.82	203.22	221.66	94.5
scaffold1_16.5	662823	663533	response regulator transcription factor	655	284.29	285.16	290.24	222.48	195.92	292.39	295.35	212.63	242.89	248.76	163.28
scaffold1_16.5	663598	664176	YqgE/AlgH family protein	656	803.81	775.85	764.3	482.21	521.16	292.47	289.02	296.46	457.09	432.05	203.97
scaffold1_16.5	664677	665534	CAMP factor pore-forming toxin 1	657	16430.2	11901	14817.9	18078.8	18840.6	13783.9	17018.3	105.23	798.32	654.04	143.13
scaffold1_16.5	665561	665991	hypothetical protein	658	27.71	22.78	23.32	21.17	25.22	33.28	38.93	42.86	25.86	14.9	3.39
scaffold1_16.5	665930	666314	hypothetical protein	659	16.16	15.22	18.78	6.75	5.77	15.47	25.28	54.9	19.78	15.61	11.43
scaffold1_16.5	666946	667380	phage antirepressor KilAC domain-containing protein	660	56	39.12	54.11	70.83	67.09	62.09	56.83	117.92	28.68	31.91	2.44
scaffold1_16.5	667424	667624	ribbon-helix-helix protein, CopG family	661	81.99	48.36	68.93	78.66	60.41	49.64	55.87	135.9	203.15	217.55	16.92
scaffold1_16.5	667728	668036	dihydrolipoyllysine acetyltransferase	662	37.57	27.26	32.38	20.51	24.73	78.74	72.94	59.4	99.16	114.02	25.38
scaffold1_16.5	668118	668268	cytidine deaminase	663	150.82	208.11	143.59	163.83	213.66	262.23	228.87	150.4	44	98.77	23.28
scaffold1_16.5	668334	668873	ClbS/DfsB family four-helix bundle protein	664	147.22	183.37	142.79	128.96	139.44	279.53	256.59	189.85	225.59	224.57	82.49
scaffold1_16.5	669199	669516	restriction endonuclease	665	79.94	79.13	79.32	81.55	89.48	105.71	102.03	126.99	1.93	2.82	0.1
scaffold1_16.5	669539	669757	type III restriction endonuclease	666	33.63	31.22	28.66	33.65	43.93	37.94	40.67	89.9	0	0	0
scaffold1_16.5	670782	671117	PadR family transcriptional regulator	667	204.27	217.63	213.15	229.68	230.37	107.15	117.79	120.61	0	0	0
scaffold1_16.5	671114	671872	hypothetical protein	668	182.03	151.46	166.89	163.61	129.26	58.52	71.72	124.07	0	0	0
scaffold1_16.5	671850	672149	PLDc N-terminal domain-containing protein	669	137.79	110.79	151.18	98.75	86.98	86.96	98.67	85.92	0	0	0
scaffold1_16.5	672146	673088	ABC transporter ATP-binding protein	670	117.28	108.22	108.08	84.87	73.77	173.94	184.39	128.05	0	0	0
scaffold1_16.5	673085	673849	ABC transporter permease subunit	671	332.38	451.1	326.28	330.64	368.05	1263.5	1372.32	833.58	0	0	0
scaffold1_16.5	674424	675026	DUF1707 and DUF4870 domain-containing protein	673	729.01	983.96	670.4	307.58	322.05	6199.82	6050.67	720.37	827.65	878.01	442.36
scaffold1_16.5	675125	675649	DUF1707 domain-containing protein	674	161.99	179.43	163.84	155.55	172.62	151.81	141.24	247.22	460.04	502.04	257.12
scaffold1_16.5	675646	677106	argininosuccinate lyase	675	303.71	285.15	289.07	255.24	260.84	397.41	435.58	372.67	566.6	599.44	367.12
scaffold1_16.5	677194	678408	acetylornithine transaminase	676	86.57	114.37	96.24	61.86	57.72	13.94	13.02	51.36	246.72	223.54	14
scaffold1_16.5	678401	679333	acetylglutamate kinase	677	131.67	153.19	140.28	85.23	72.07	13.58	12.54	37.74	326.43	333.78	8.32
scaffold1_16.5	679330	680496	bifunctional glutamate N-acetyltransferase/amino-acid acetyltransferase ArgJ	678	213.37	205.27	213.66	134.95	108.3	89.96	67.59	71.34	182.31	178.03	5.41
scaffold1_16.5	680508	681561	N-acetyl-gamma-glutamyl-phosphate reductase	679	794.66	694.87	786.21	480.71	387.41	111.11	100.4	65.9	339.89	308.41	13.56
scaffold1_16.5	681660	682142	SsrA-binding protein SmpB	680	491.97	496.4	438.3	473.49	423.19	1358.72	1234.62	999.09	771.96	811.02	549.17
scaffold1_16.5	682188	683039	ABC transporter permease	681	381.76	518.12	386.46	296.48	314.25	781.03	672.55	1206.08	766.83	795.47	947.49
scaffold1_16.5	683124	683810	cell division ATP-binding protein FtsE	682	530.01	854.2	547.04	492.44	523.2	996.83	820.56	1342.53	805.7	897.97	1371.77
scaffold1_16.5	683822	684928	peptide chain release factor 2	683	827.95	1250.46	817.82	859.82	1037.63	859.62	759.16	1501.86	754.13	857.58	2034.92
scaffold1_16.5	685174	685932	DUF805 domain-containing protein	685	343.79	394.06	328.28	225.84	243.19	482.58	484.12	423.64	965.26	976.6	342.13
scaffold1_16.5	685987	688353	DNA translocase FtsK 4TM domain-containing protein	686	892.53	842.57	804.15	608.23	583.24	547.68	524.62	565.28	752.95	736.47	769.63
scaffold1_16.5	688373	688663	amidase	687	865.7	824.1	773.05	718.67	700.83	710.28	753.84	511.64	558.01	662.86	507.58
scaffold1_16.5	688678	689640	thiamine-phosphate kinase	688	588.08	581.22	557.04	580.91	523.47	534.29	517.12	692.5	637.38	531.83	341.22
scaffold1_16.5	689683	690138	DUF3515 domain-containing protein	689	567.21	646.08	520.61	477.57	496.48	310.69	310.29	322.88	466.77	500.2	258.25
scaffold1_16.5	690151	691248	D-alanine--D-alanine ligase	690	764.09	863.86	759.6	769.75	952.46	730.54	716.67	670.11	692.9	774.26	760.95
scaffold1_16.5	691297	692019	1-acyl-sn-glycerol-3-phosphate acyltransferase	691	156.29	177.68	171.23	209.4	200.23	129.04	132.62	391.25	497.79	534.28	883.95
scaffold1_16.5	692172	692663	3-isopropylmalate dehydratase	692	5.22	3.96	5.29	6.34	4.27	15.42	15.86	36.48	43.81	62.74	9.24
scaffold1_16.5	692630	692872	isopropylmalate isomerase	693	9.67	9.63	9.4	18.58	5.29	11.51	9.67	38.26	19.23	33.56	2.44
scaffold1_16.5	692859	693047	hypothetical protein	694	24.18	37.13	21.11	23.76	41.41	12.33	9.14	38.43	31.28	91.21	13.8
scaffold1_16.5	693120	693431	2-methylmalate dehydratase	695	126.03	214.47	138.34	208.6	198.6	48.24	46.85	79.99	56.86	127.5	48.28
scaffold1_16.5	693652	694371	IclR family transcriptional regulator	696	487.97	749.51	490.49	594.89	619.37	1090.77	1103.12	538.06	474.47	563.26	613.07
scaffold1_16.5	694872	695816	CPBP family intramembrane metalloprotease	699	328.99	345.1	332.78	258	235.15	210.62	202.2	383.06	413.02	402	274
scaffold1_16.5	695816	696616	fumarylacetoacetate hydrolase family protein	700	572.85	647.13	570.64	430.03	470.51	553.46	593.51	432.91	446.96	367.62	296.51
scaffold1_16.5	696697	697986	thymidine phosphorylase	701	359.92	352.38	348.72	419.6	348.72	287.48	307.98	398.98	779.49	848.25	689.31
scaffold1_16.5	698026	699117	branched-chain amino acid aminotransferase	702	535.14	720.63	543.48	634.56	556.39	567.65	528	749.82	1112.39	1278.77	2306.72
scaffold1_16.5	699205	700263	3-isopropylmalate dehydrogenase	703	81.02	112.98	76.89	121.19	134.31	60.99	50.53	109.06	127.24	179.95	44.6
scaffold1_16.5	700330	700908	SAM-dependent methyltransferase	704	155.47	137.74	150.97	163.9	135.69	139.17	137.81	140.67	428.32	518.5	154.66
scaffold1_16.5	700975	702003	ketol-acid reductoisomerase	705	227.76	193.31	229.79	165.36	159.89	308.52	274.77	167.08	454.82	453.4	87.08
scaffold1_16.5	702056	702604	thiamine pyrophosphate-binding protein	706	240.1	253.58	248.86	305.88	302.27	114.32	139.03	190.67	81.73	68.59	12.53
scaffold1_16.5	702787	703197	HIT domain-containing protein	707	506.76	554.5	485.34	485.72	507.5	532.49	444.04	518.32	413.43	350.44	403.88
scaffold1_16.5	703242	704003	imidazole glycerol phosphate synthase subunit HisF	708	141.27	141.01	133.26	142.7	131.68	106.24	95.97	300.04	413.57	484.24	431.44
scaffold1_16.5	704055	706808	DEAD/DEAH box helicase	709	229.86	251.64	218.64	186.88	224.67	153.61	155.51	334.75	345.71	363.03	537.54
scaffold1_16.5	706838	707005	gamma-glutamyl transferase	710	92.21	107.13	96.9	65.78	72.16	120.92	108.58	286.64	529.96	668.5	198.98
scaffold1_16.5	707002	707871	twin-arginine translocase subunit TatC	711	358.63	333.74	361.69	270.48	255.75	376.28	374.46	586.36	873.47	1007.42	587.03
scaffold1_16.5	707875	708108	twin-arginine translocase TatA/TatE family subunit	712	667.65	572.88	634.79	492.23	529.87	699.34	655.62	1465.52	955.35	1138.34	1439.86
scaffold1_16.5	708203	708406	hypothetical protein	713	211.62	307.8	236.18	195.8	309.01	249.83	225.64	420.17	578.95	469.69	469.61
scaffold1_16.5	708406	709374	WYL domain-containing protein	714	343.86	446.24	366.44	353.94	398.37	198.31	188.61	322.25	505.88	509.71	371.36
scaffold1_16.5	709371	710333	WYL domain-containing protein	715	607.94	564.27	575.76	507.84	543.71	266.29	245.05	397.25	716.61	792.09	380.5
scaffold1_16.5	710421	711422	tRNA glutamyl-Q(34) synthetase GluQRS	716	264.49	238.22	258.06	261.17	219.81	262.65	258.75	364.04	579.24	703.89	420.31
scaffold1_16.5	711465	712304	FKBP-type peptidyl-prolyl cis-trans isomerase	717	664.95	647.22	663.32	523.29	455.37	819.48	755.45	1010.38	963.95	1090.37	852.43
scaffold1_16.5	712297	712620	hypothetical protein	718	602.58	570.15	588.98	442.92	402.23	565.62	531.83	697.86	796.18	786.34	638.08
scaffold1_16.5	712549	713286	rRNA pseudouridine synthase	719	439.95	543.8	451.29	362.42	372.97	661.17	579.41	591.63	733.29	687.03	734.96
scaffold1_16.5	713304	713669	hypothetical protein	720	516.13	728.44	557.48	464.9	583.2	638.36	601	489.25	683.6	673.96	531.49
scaffold1_16.5	713654	714571	ParA family protein	721	1046.72	1434.02	1057.32	1005.23	1262.24	2120.74	2378.31	716.61	550.18	603.37	958.99
scaffold1_16.5	714663	715583	site-specific tyrosine recombinase XerD	722	118.82	169.42	137.07	142.74	142.46	133.42	140.32	254.9	463.97	335.86	297.02
scaffold1_16.5	715580	716239	NUDIX hydrolase	723	313.29	380.84	311.49	362.37	343.61	253.75	249.59	415.28	631.58	418.87	385.27
scaffold1_16.5	716236	717924	CTP synthase	724	425.73	477.29	428.77	389.54	382.9	451.4	436.07	457.6	743.9	611.23	480.76
scaffold1_16.5	717944	718243	hypothetical protein	725	107.89	188.94	139.39	96.66	82.23	140.49	123.25	139.82	222.03	172.76	127.11
scaffold1_16.5	718310	718456	hypothetical protein	726	103.54	159.35	102.3	80.84	89.75	121.63	123.45	140.94	339.07	408.64	125.75
scaffold1_16.5	718453	718674	hypothetical protein	727	121.26	173.05	130.8	86.89	106.63	92	86.35	403.05	464.1	429.25	263.05
scaffold1_16.5	718690	720369	DNA repair protein RecN	728	172.99	202.24	171.71	136.08	149.7	136.22	130.94	352.77	424.23	387.14	270.64
scaffold1_16.5	720366	721301	NAD kinase	729	193.49	208.41	199.11	129.06	155.45	193.85	162.28	421.52	494.78	427.74	253
scaffold1_16.5	721341	722132	TlyA family RNA methyltransferase	730	52.99	55.42	60.46	55.67	65.52	268.25	232.24	315.4	477.44	418.46	271.51
scaffold1_16.5	722388	723020	energy-coupling factor transporter transmembrane protein EcfT	731	12.94	15.89	15.05	13.43	12.77	254.5	235.32	193.5	253.89	246.54	296.62
scaffold1_16.5	723027	723812	ABC transporter ATP-binding protein	732	22.11	33.52	26.8	28.55	25.04	670.63	580.71	326.63	375	340.15	556.6
scaffold1_16.5	723809	724393	biotin transporter BioY	733	39.66	44.46	44.08	45.48	45.87	628.63	612.04	341.45	498.6	541.74	856.43
scaffold1_16.5	724449	725447	HAD-IIA family hydrolase	734	140.52	173	148.15	149.73	130.95	1018.65	1012.25	705.02	497.52	402.97	759.28
scaffold1_16.5	725444	726562	tetratricopeptide repeat protein	735	297.09	412.63	315.58	334.88	321.66	1473.49	1472.35	1051.81	605.74	575.92	1033.7
scaffold2_19.7	233	1243	Lrp/AsnC family transcriptional regulator	736	132.98	176.95	136.25	190.31	205.14	46.83	50.63	66.38	114.63	112.67	48.17
scaffold2_19.7	1537	2580	Gfo/Idh/MocA family oxidoreductase	737	14.81	9.99	12.21	22.53	17.46	15.48	15.35	98.78	44.79	44.7	12.38
scaffold2_19.7	2592	2939	hypothetical protein	738	13.61	12.86	11.14	12.91	14.94	8.56	7.52	65.91	83.23	69.9	10.62
scaffold2_19.7	2936	4357	PLP-dependent lyase/thiolase	739	10.53	10.15	8.56	13.42	11.74	14.91	12.18	86.42	140.61	188.11	106.58
scaffold2_19.7	4354	4779	ornithine aminomutase	740	9.1	7.36	7.3	8.3	4.73	3.3	3	71.27	13.89	39.27	8.57
scaffold2_19.7	4776	7094	cobalamin-dependent protein	741	11.43	10.24	10.83	16.57	13.46	7.11	6.56	84.48	31.2	35.37	9.55
scaffold2_19.7	7100	8530	glutamate mutase L	742	25.99	24.38	24.62	42.06	35.37	28.26	24.41	124.12	137.57	116.98	28.37
scaffold2_19.7	8527	9615	alanine/ornithine racemase family PLP-dependent enzyme	743	12.46	16.14	12.14	17.1	19.66	15.05	12.82	56.18	132.38	167.1	120.99
scaffold2_19.7	9714	11129	amino acid permease	744	36.9	64.7	36.71	45.47	65.69	101.88	83.57	127.95	59.86	65.84	18.05
scaffold2_19.7	11487	13007	amino acid permease	745	50.62	69.48	50.14	75.87	94.05	39.12	36.99	82.46	127.44	116.5	12.1
scaffold2_19.7	13234	14361	alanine racemase	746	153.32	197.14	164.35	258.7	247.68	272.26	270.12	206.19	192.07	129.65	25.16
scaffold2_19.7	14571	15995	phosphoglucomutase/phosphomannomutase family protein	747	300.64	395.63	331.52	348.18	375.42	398	367.53	183.47	446.11	304.13	136.28
scaffold2_19.7	16111	17301	galactokinase	748	202.22	294.22	228.58	295.79	280.15	167.08	152.35	566.98	503.91	400.78	263.86
scaffold2_19.7	17298	18134	nucleotidyltransferase family protein	749	206.28	313.31	254.21	294.01	293.77	326.01	306.08	589.05	551.39	390.78	255.4
scaffold2_19.7	18260	19087	hypothetical protein	750	83.21	80.5	85.17	80.53	89.27	71.18	71.79	96.39	300.44	279.13	26.06
scaffold2_19.7	19093	19272	hypothetical protein	751	45.02	41.75	48.37	47.08	40.95	32.65	38.83	61.35	246.83	327.22	40.93
scaffold2_19.7	19302	20183	DUF559 domain-containing protein	752	14.79	16.5	12.91	18.08	15.54	27.84	26.34	92.87	112.95	113.05	22.64
scaffold2_19.7	20433	21839	class II fumarate hydratase	753	1547.33	1318.65	1560.31	1416.5	1231.98	1129.84	1157.2	269.13	584.62	566.26	336.09
scaffold2_19.7	22001	22912	carbohydrate ABC transporter permease	754	72.34	112.58	72.1	55.89	72.93	75.19	72.13	71.56	133.66	138.33	19.21
scaffold2_19.7	22914	23807	sugar ABC transporter permease	755	35.52	64.02	37.97	40.13	33.73	75.44	78.12	72.17	224.61	165.96	17.95
scaffold2_19.7	24045	25354	extracellular solute-binding protein	756	87.58	102.44	94.16	126.12	117.63	221.03	198.34	142.87	139.52	148.01	71.04
scaffold2_19.7	25602	26582	LacI family DNA-binding transcriptional regulator	757	111.44	138	121.25	138.39	126.7	281.25	274.22	201.97	227.83	225.03	116.84
scaffold2_19.7	26591	27283	suppressor of fused domain protein	758	470.27	754.36	489.02	547.91	634.94	413.5	348.52	425.27	394.31	338.17	385.93
scaffold2_19.7	27409	28266	mechanosensitive ion channel	759	182.65	268.86	208.38	156.36	194.09	468.38	410.55	305.35	454.57	489.45	193.34
scaffold2_19.7	28436	29689	glycerate kinase	760	197.64	261.96	215.9	254.53	287.92	161.03	156.41	332.69	413.52	310.88	230.37
scaffold2_19.7	29695	29949	hypothetical protein	761	123.03	149.42	122.9	175.74	169.1	572.15	558.74	184.45	444.01	488.9	237.06
scaffold2_19.7	30031	31554	CCA tRNA nucleotidyltransferase	762	144.75	164.22	156.26	165.75	187.53	121.51	113.07	179.91	360.99	334.46	76.71
scaffold2_19.7	31551	31817	DNA-binding protein	763	280.02	260.06	280.24	312.8	326.47	175.62	172.66	145.48	419.11	307.23	80.94
scaffold2_19.7	31816	33738	hypothetical protein	764	200.53	216.92	221	167.75	200.95	158.26	146.4	109.88	310.44	251.23	61.04
scaffold2_19.7	33872	35617	serine/threonine protein kinase	765	615.34	791.03	643.39	785.83	924.21	359.48	377.88	365.66	369.23	373.38	368.81
scaffold2_19.7	35971	37518	glycerol kinase GlpK	766	195.9	188.28	200.34	202.51	184.89	370.81	359.91	531.75	493.23	452.27	380.73
scaffold2_19.7	37579	38331	aquaporin family protein	767	69.7	72.87	68.34	109.35	115.23	135.75	122.52	274.26	284.66	262.66	221.26
scaffold2_19.7	38520	39467	helix-turn-helix domain-containing protein	768	338.2	345.82	348.52	369.11	366.54	750.62	679.63	532.64	1084.36	1172.95	508.84
scaffold2_19.7	39538	40563	trypsin-like peptidase domain-containing protein	769	303.22	295.95	319.82	199.07	183.09	1375.67	1314.04	671.78	994.02	1163.82	470.41
scaffold2_19.7	41164	41400	hypothetical protein	770	42.44	34.68	33.03	54.79	51.35	173.18	142.28	125.09	318.89	438.21	112.06
scaffold2_19.7	41570	41829	LacI family DNA-binding transcriptional regulator	771	172.85	169.39	186.28	200.96	197.44	691.91	669.54	261.9	410.3	293.83	77.66
scaffold2_19.7	41886	42938	thioredoxin-disulfide reductase	772	238.91	222.5	294.75	333.27	340.85	1835.6	1908.11	1844.08	515.09	442.55	1352.2
scaffold2_19.7	43281	43481	hypothetical protein	773	97.98	125.04	109.8	138.93	157.2	419.73	530.08	215.04	94.64	90.71	45.98
scaffold2_19.7	43529	44374	RluA family pseudouridine synthase	774	120.44	164.7	137.4	157.93	179.11	227.9	264.9	246.27	167.02	179.54	159.55
scaffold2_19.7	44818	45990	MFS transporter	775	43.94	46.65	45.28	50.66	48.74	65.13	65.57	96.1	142.01	132.84	34.55
scaffold2_19.7	45992	46921	alpha/beta hydrolase	776	63.09	70.96	71.4	72.62	61.66	31.84	32.72	179.63	349.86	321.92	111.07
scaffold2_19.7	47044	47481	OsmC family protein	777	467.4	402.04	470.58	504.38	437.83	285.25	268.93	658.7	810.97	770.71	1629.6
scaffold2_19.7	47490	47816	thioredoxin	778	435.91	412.03	422.17	490.55	421.82	757.05	697.45	553.13	809.73	765.3	1429.04
scaffold2_19.7	48057	49125	glycerol-3-phosphate dehydrogenase	779	124.52	179.31	115.2	95	113.13	67.94	65.49	118.36	258.79	354.34	230.42
scaffold2_19.7	49258	50232	TetR family transcriptional regulator	780	140.82	203.84	146.49	182.7	194.65	177.5	158.35	342.13	328.71	368.97	225.73
scaffold2_19.7	50252	52309	transketolase	781	313.74	442.89	339.26	396.08	432.97	517.3	484.42	578.73	533.32	480.52	413.33
scaffold2_19.7	52446	54155	ribulokinase	782	77.78	89.94	75.85	97.13	95.05	71.84	80.55	162.19	179.54	170.43	82.28
scaffold2_19.7	54228	55592	sn-glycerol-1-phosphate dehydrogenase	783	64.7	70.47	69.49	93.3	74.67	100.32	99.86	167.55	294.02	256.37	60.07
scaffold2_19.7	55576	57180	xylulose kinase	784	30.07	33.91	31.81	41.64	38	59.73	58.05	90.06	165.23	131.39	19.54
scaffold2_19.7	57237	58094	HAD-IIA family hydrolase	785	27.63	39.14	34.48	39.7	36.43	100.69	104.95	90.34	145.55	120.71	34.19
scaffold2_19.7	58117	59196	hypothetical protein	786	38.34	35.68	41.78	73.02	46.71	113.83	118.09	92.87	69.95	86.6	35.48
scaffold2_19.7	59342	59824	RpiB/LacA/LacB family sugar-phosphate isomerase	787	109.86	85.96	101.19	84.75	94.31	460.12	388.6	272.64	122.19	89.52	94.08
scaffold2_19.7	60040	60708	L-ribulose-5-phosphate 4-epimerase	788	113.57	124.23	123.84	141.4	143.63	83.97	67.08	217.1	80.21	64.93	18.79
scaffold2_19.7	60768	61334	glycerol-3-phosphate responsive antiterminator	789	104.57	148.71	125.32	134.73	133.84	217.57	193.39	244.57	0	0	0
scaffold2_19.7	61400	62050	class II aldolase/adducin family protein	790	260.12	362.57	281.65	314.11	347.92	378.52	346.8	338.65	0	0	0
scaffold2_19.7	62065	63114	2-hydroxyacid dehydrogenase	791	89.21	155.8	97.88	106.68	93.46	178.1	155.44	168.59	0	0	0
scaffold2_19.7	63101	63808	carbohydrate kinase	792	267.1	381.24	282.82	332.61	344.45	542.85	541.51	356.7	0	0	0
scaffold2_19.7	63867	64520	carbohydrate kinase	793	329.86	479.81	337.03	446.51	569.11	328.68	367.56	294.01	0	0	0
scaffold2_19.7	64750	65556	DeoR/GlpR transcriptional regulator	794	272.75	289.81	272.92	363.8	376.62	136.44	138.26	361.32	287.15	278.54	215.34
scaffold2_19.7	65612	65800	hypothetical protein	795	124.04	156.25	145.3	221.38	210.19	73.03	70.45	253.37	10.65	8.52	6.14
scaffold2_19.7	65819	66892	mannonate dehydratase	796	31.27	59.2	40.38	49.64	47.5	34.03	37.1	128.5	33.14	28.26	23.33
scaffold2_19.7	66895	68484	mannitol dehydrogenase family protein	797	15.26	22.27	18.91	30.65	34.32	32.05	28.86	59.85	86.81	79.91	39.34
scaffold2_19.7	68500	69912	glucuronate isomerase	798	14.79	18.09	14.01	30.2	36.97	22.65	25.71	54.39	90.5	108.85	9.41
scaffold2_19.7	69977	70984	LacI family DNA-binding transcriptional regulator	799	74.79	114.98	75.04	98.35	105.43	276.92	268.94	194.45	184.55	207.05	68.78
scaffold2_19.7	71161	72585	MFS transporter	800	6.95	11.29	8.11	6.81	8.07	5.35	4.69	52.57	17.7	26.18	2.55
scaffold2_19.7	72605	75096	glucosidase	801	23.93	23.76	25.41	37.93	29.64	52.69	39.92	103.38	60.71	45.06	19.39
scaffold2_19.7	75129	76909	beta-glucuronidase	802	16.11	24.15	20.93	24.76	22.05	29.58	27.32	85.65	287.93	289.04	116.02
scaffold2_19.7	77034	80414	hypothetical protein	803	491.18	389.67	519.41	377.57	322.51	555.15	544.4	286.58	609.14	413.7	248.62
scaffold2_19.7	80685	81386	(2Fe-2S)-binding protein	804	62.01	54.55	61.12	85.98	64.57	55.25	57.74	105.13	273.49	244.9	73.12
scaffold2_19.7	81332	82018	hypothetical protein	805	126.56	105.26	117.05	194.02	167.46	62.11	65.54	141.67	128.26	100.85	114.41
scaffold2_19.7	82213	83559	PLP-dependent aminotransferase family protein	806	422.9	592.09	447.77	428.05	432.28	427.03	397.67	304.65	389.46	283.41	298.09
scaffold2_19.7	83890	84838	D-alanine--D-alanine ligase	807	238.59	331.17	272.57	306.8	327.98	296.47	249.71	313.46	374.4	339.44	183.29
scaffold2_19.7	84831	85547	SURF1 family protein	808	56.57	92.87	67.52	61.65	72.05	80.39	67.46	112.38	213.73	221.81	96.26
scaffold2_19.7	85544	86116	DUF3817 domain-containing protein	809	116.14	206.19	152.32	141.64	149.55	658.14	538.79	380.2	376.03	359.67	92.27
scaffold2_19.7	86375	87301	ParB/RepB/Spo0J family partition protein	810	205.37	413.25	239.74	216.18	259.85	399.85	386.16	411.14	689.1	734.4	374.12
scaffold2_19.7	87298	88290	ParA family protein	811	221.9	339.09	265.48	228.2	276.09	269.35	199.89	391	534.12	476.21	303.66
scaffold2_19.7	88346	88537	hypothetical protein	812	68.94	66.04	78.43	84.25	102.79	70.76	57.01	156.64	396.12	463.61	94.61
scaffold2_19.7	88671	88899	hypothetical protein	813	33.35	32.33	34.01	36.47	47.7	17.59	15.21	118.77	113.66	154.85	24.75
scaffold2_19.7	89488	89855	hypothetical protein	814	28.29	36.39	24.77	47.87	50.49	91.49	77.62	89.58	199.54	193.24	33.82
scaffold2_19.7	89864	90082	hypothetical protein	815	40.67	69.48	46.92	68.53	73.72	135.07	133.86	134.88	368.85	302.31	115.91
scaffold2_19.7	90112	90747	16S rRNA (guanine(527)-N(7))-methyltransferase RsmG	816	113.93	157.15	119.89	179.13	213.7	252.92	239.7	310.22	661.45	593.16	391.63
scaffold2_19.7	91455	91826	hypothetical protein	817	6.72	8.73	7.6	13.57	15.56	23.16	18.91	75.71	41.25	14.84	7.61
scaffold2_19.7	92107	92547	hypothetical protein	818	64.63	129.79	69.9	71.51	86.61	61.89	74.81	168.22	346.39	379.22	252.92
scaffold2_19.7	92785	93813	alanine racemase	819	416.18	688.88	498.16	445.29	485.04	456.6	376.21	1077.26	737.09	674.01	736.13
scaffold2_19.7	93815	94906	peptidoglycan bridge formation glycyltransferase FemA/FemB family protein	820	551.99	878.05	629.78	564.53	640.73	784.1	643.22	1261.63	706.26	683.62	817.78
scaffold2_19.7	94951	95148	hypothetical protein	821	13.98	20.33	17.01	24.06	20.95	60.9	64.51	85.14	275.29	392.66	53.72
scaffold2_19.7	95152	95763	protein jag	822	535.25	571.62	512.31	609.9	602.61	1345.24	1092.9	1424.53	739.25	942.47	831
scaffold2_19.7	95816	96895	membrane protein insertase YidC	823	190.7	335.13	230.3	271.66	258.94	606.79	557.49	785.48	633.62	741.03	445.58
scaffold2_19.7	96895	97371	membrane protein insertion efficiency factor YidD	824	186.15	348.33	241.87	303.83	262.13	356.85	330.58	1108.66	781.84	1016.13	593.01
scaffold2_19.7	97368	97814	ribonuclease P protein component	825	576.69	1088.98	781.43	888.59	827.53	1174.25	1179.01	2553.77	1010.47	1300.07	1575.22
scaffold2_19.7	97821	97955	50S ribosomal protein L34	826	681.19	1032.33	777.85	1116.19	982.14	1063.52	1229.37	2371.39	1010.24	1165.06	1243.96
scaffold2_19.7	98315	99817	chromosomal replication initiator protein DnaA	827	401.58	582.55	479.42	528.45	630.15	261	228.8	522.74	447.97	429.48	210.44
scaffold2_19.7	100290	101450	DNA polymerase III subunit beta	828	446.9	532.31	484.99	615.78	618.17	773.31	734.23	1231.48	854.71	899.95	1067.49
scaffold2_19.7	101587	102240	hypothetical protein	829	186.25	306.46	190.9	250	220.38	132.51	144.42	186.51	244.9	312.74	83.33
scaffold2_19.7	102277	103482	DNA replication/repair protein RecF	830	131.38	179.91	141.95	171.74	163.63	145.79	146.52	420.81	369.66	439.89	350.65
scaffold2_19.7	103475	104068	DUF721 domain-containing protein	831	108.47	144.47	109.9	150.03	164.91	102.12	84.23	373.63	534.55	567.13	369.6
scaffold2_19.7	104144	104341	ABC transporter permease	832	42.14	73.35	52.27	36.96	50.47	275.58	255.07	296.59	294.74	261.09	95.11
scaffold2_19.7	104706	105893	mannose-6-phosphate isomerase, class I	833	114.45	130.55	126.96	138.98	132.3	141.28	159.04	329	294.23	185.92	225.35
scaffold2_19.7	106150	108207	DNA topoisomerase (ATP-hydrolyzing) subunit B	834	422.65	620.34	475.44	434.6	432.55	773.95	718.6	755.94	578.58	638.55	798.88
scaffold2_19.7	108249	110924	DNA gyrase subunit A	835	314.2	527.45	368.84	335.67	314.23	365.93	353.98	998.4	672.63	764.78	911.28
scaffold2_19.7	110917	111549	DUF3566 domain-containing protein	836	738.46	967.41	756.67	881.51	909.25	1305.6	1191.32	2023.6	857.35	1078.44	1620.37
scaffold2_19.7	111648	112643	lactate dehydrogenase	837	226.82	246.17	231.15	278.89	271.9	117.35	107.48	427.44	612.56	801.28	500.06
scaffold2_19.7	113306	114313	LacI family DNA-binding transcriptional regulator	838	86.33	95.82	83	171.66	172.7	128.3	99.81	95.99	98.56	132.76	39.51
scaffold2_19.7	114310	115815	sugar ABC transporter ATP-binding protein	839	58.46	85.6	63.41	143.88	168.73	57.54	47.81	92.21	36.71	50.73	29.26
scaffold2_19.7	115872	116873	ABC transporter permease	840	43.52	78.56	52.55	95.42	109.84	38.9	33.38	48.46	24.19	19.2	16.34
scaffold2_19.7	116922	117862	substrate-binding domain-containing protein	841	55.55	92.57	64.23	87.73	112.49	40.9	38.26	70.72	30.04	37.82	35.97
scaffold2_19.7	117859	118788	ribokinase	842	50.39	65.4	50.61	70.17	83.81	28.42	26.23	118.4	86.22	85.97	60.13
scaffold2_19.7	118785	119168	D-ribose pyranase	843	72.61	94.39	69.55	92.01	87.24	74.13	67.25	202.56	236.21	234.9	191.82
scaffold2_19.7	119912	120232	NYN domain-containing protein	845	47.14	85.76	51.8	88.99	97.93	184.65	135.81	235.43	0	0	0
scaffold2_19.7	120631	121044	hypothetical protein	846	28.99	32.62	29.66	51.19	45.68	88.15	89.06	194.73	0	0	0
scaffold2_19.7	121133	122166	glycerol-3-phosphate dehydrogenase	847	48.21	34.01	45.15	51.26	46.84	31.34	31.56	88.78	0	0	0
scaffold2_19.7	122267	123835	FGGY-family carbohydrate kinase	848	5.47	5.37	5.58	13.05	11.09	22.79	21.24	94.77	9.48	14.99	3.1
scaffold2_19.7	124018	124494	PTS sugar transporter subunit IIA	849	1.74	6.09	3.85	7.05	5.17	4.96	8.62	46.62	27.76	28.42	16.9
scaffold2_19.7	124552	125808	PTS galactitol transporter subunit IIC	850	6.32	7.09	5.92	9.55	6.52	19.23	15.18	40.66	48.05	46.27	12.21
scaffold2_19.7	125829	126131	PTS sugar transporter subunit IIB	851	3.95	11.37	3.33	12.36	11.64	26.73	26.97	42.58	13.31	35.77	6.77
scaffold2_19.7	126121	127194	alcohol dehydrogenase catalytic domain-containing protein	852	6.06	11.18	7.8	11.93	10.44	29.65	28.07	58.69	25.26	35.76	3.21
scaffold2_19.7	127442	129361	PTS sugar transporter subunit IIA	853	55.63	117.31	76.5	66.63	58.55	485.31	475.27	160.6	95.23	82.01	34.25
scaffold2_19.7	130801	131142	hypothetical protein	854	74.05	76.8	72.48	102.38	108.77	48.7	68.37	153.14	318.11	342.48	185.67
scaffold2_19.7	131496	132139	HAD-IA family hydrolase	855	84.56	49.1	76.32	63.09	52.58	26.39	35.46	123.02	154.41	138.49	36
scaffold2_19.7	132272	133030	DeoR/GlpR transcriptional regulator	856	175.42	154.16	182.08	135.98	116.49	205.22	202.79	106.19	104.85	111.65	26.7
scaffold2_19.7	133171	133603	hypothetical protein	857	206.9	233.38	217.25	117.67	100.5	239.02	277.78	48.43	60.61	45.7	6.06
scaffold2_19.7	133648	134382	hypothetical protein	858	1043.33	1157.18	1072.85	783.54	774.28	597.68	818.42	303.46	188.18	181.48	47.48
scaffold2_19.7	134376	134636	hypothetical protein	859	995.07	1450.37	1077.68	991.02	1034.25	1330.71	1426.43	520.39	333.58	316.76	43.73
scaffold2_19.7	135123	135497	aminotransferase class I/II-fold pyridoxal phosphate-dependent enzyme	860	126.48	163.34	125.22	142.67	124.8	131.02	130.85	189.96	361.25	343.85	486.09
scaffold2_19.7	135464	136108	aminotransferase class I/II-fold pyridoxal phosphate-dependent enzyme	861	141.52	191.82	154.25	137.89	134.59	90.18	80.71	160.6	276.22	282.85	214.87
scaffold2_19.7	136112	136990	patatin family protein	862	260.46	353.15	280.73	237.6	298.41	189.86	187.77	168.07	350.94	353.74	149.56
scaffold2_19.7	137042	137608	GNAT family N-acetyltransferase	863	109.81	170.72	116.91	282.11	360.3	143.84	141.38	286.87	461.09	472.61	263.33
scaffold2_19.7	137622	138281	hypothetical protein	864	165.43	166.49	167.87	252.83	224.1	256.28	247.42	343.56	363.77	313.44	141.36
scaffold2_19.7	138699	139172	flagellar biosynthesis protein FlgA	865	5.63	5.95	6.32	20.86	16.86	12.2	12.07	48.51	276.85	398.15	7.25
scaffold2_19.7	139172	139990	hypothetical protein	866	4.33	2.98	4.44	17.78	12.92	12.29	12.64	65.45	353.75	354.61	9.45
scaffold2_19.7	140284	141480	CpaF family protein	867	20.73	24.65	23	40.01	32.78	28.52	28.15	159.71	73.68	69.09	24.8
scaffold2_19.7	141471	142352	type II secretion system F family protein	868	14.91	17	16.49	30.04	26.73	20.03	18.65	101.25	41.85	31.42	29.97
scaffold2_19.7	142345	143247	hypothetical protein	869	15.73	14.95	14.52	27.2	19.55	9.03	12.8	95.48	24.89	27.54	17.79
scaffold2_19.7	143317	143529	hypothetical protein	870	43.76	57.54	46.71	61.58	49.02	65.29	58.74	94.47	67.08	105.5	9.34
scaffold2_19.7	143526	143906	pilus assembly protein	871	35.89	45.1	46.62	43.06	39.07	39.19	48.11	131.88	139.31	151.68	16.96
scaffold2_19.7	143903	144412	hypothetical protein	872	49.32	61.51	42.83	56.29	59	31.38	34.79	142.19	116.69	121.67	19.4
scaffold2_19.7	144409	147171	LysM peptidoglycan-binding domain-containing protein	873	35.65	45.74	42.02	58.86	47.28	39.84	38.46	128.33	95.64	88.11	28.21
scaffold2_19.7	147218	148615	MFS transporter	874	123.34	155.17	137.06	158.96	179.63	104.16	103.28	195.99	264.38	317.89	226.09
scaffold2_19.7	148885	150633	formate--tetrahydrofolate ligase	875	274.23	263.97	291.15	232.24	238.21	95.77	96.87	154.22	390.48	385.63	133.89
scaffold2_19.7	150739	151152	hypothetical protein	876	424.03	443.9	424.72	504.91	478.24	170.3	151.49	318.75	881.4	718.78	161.57
scaffold2_19.7	151149	151637	hypothetical protein	877	1096.89	1290.9	1086.47	1244.98	1412.77	511.16	461.8	637.6	1133.12	1120.49	604.52
scaffold2_19.7	151696	152367	hypothetical protein	878	64.89	64.49	65.14	86.34	68.21	80.29	87.19	133.78	84.43	110.57	50.84
scaffold2_19.7	152565	155036	FtsX-like permease family protein	879	1208	1254.76	1253.88	1204.85	1159.88	1345.52	1330.03	1160.6	537.04	615.61	946.5
scaffold2_19.7	155036	156070	ABC transporter ATP-binding protein	880	1102.86	1089.46	1146.44	834.75	846.28	1169.97	1226.42	683.83	424.75	541.42	553.79
scaffold2_19.7	156178	156834	response regulator transcription factor	881	374.65	515.52	437.25	470.29	519.91	582.14	549.89	253.4	419.81	437.37	163.08
scaffold2_19.7	156853	157401	hypothetical protein	882	349.58	489.15	414.78	356.4	433.73	257.2	231.12	150.48	267.85	191.27	26.85
scaffold2_19.7	157537	158367	carbohydrate ABC transporter permease	883	54.55	95.23	67.89	81.55	104.62	94.62	98.83	126.38	160.2	162.93	30.7
scaffold2_19.7	158367	159260	sugar ABC transporter permease	884	49.59	77.28	56.83	85.1	106.27	115.85	108.9	72.9	85.24	89.81	12.88
scaffold2_19.7	159345	160649	extracellular solute-binding protein	885	77.44	74.03	76.15	141.61	151.91	204.54	200.95	89.04	166.08	177.09	35.09
scaffold2_19.7	160996	161754	DeoR/GlpR transcriptional regulator	886	61.49	85.73	71.78	144.17	168.22	150.89	121.8	208.02	288	275.62	63.37
scaffold2_19.7	161751	163139	6-phospho-beta-glucosidase	887	135.34	198.14	152.54	287.06	277.81	148.31	167.43	252.28	356.62	345.98	117.36
scaffold2_19.7	163132	166260	alpha-mannosidase	888	157.42	197.42	167.57	256.64	265.85	220.1	216.21	274.09	340.33	332.54	151.23
scaffold2_19.7	166257	167312	alkaline phosphatase family protein	889	93.57	141.71	122.89	154.03	196.46	82.24	92.76	202.98	344.52	338.6	91.06
scaffold2_19.7	167306	167950	HAD family phosphatase	890	89.08	124.71	91.28	146.43	175.3	70.4	74.56	253.43	404.15	302.89	161.02
scaffold2_19.7	167947	169242	glycoside hydrolase family 125 protein	891	101.11	163.52	120.42	176.25	199.22	132.17	139.98	285.69	365.83	339.78	206.02
scaffold2_19.7	169226	170764	beta-N-acetylhexosaminidase	892	132.63	128.57	143.9	195.74	169.99	86.88	110.59	171.14	245.53	260.54	96.4
scaffold2_19.7	170831	171805	carbohydrate kinase family protein	893	1194.55	1024.76	1150.47	1406.24	1383.76	288.7	296.67	647.6	404.08	390.06	341.04
scaffold2_19.7	171824	173194	sensor histidine kinase	894	697.59	685.09	691.06	885.3	932.2	322.81	334.63	310.28	435.12	404.01	337.38
scaffold2_19.7	173302	174363	UDP-glucose 4-epimerase GalE	895	1195.5	1031.4	1176.74	1184.85	1356.19	997.23	957.41	843.28	876.56	821.84	758.89
scaffold2_19.7	174436	175068	TetR/AcrR family transcriptional regulator	896	306.68	339	327.06	392.54	404.89	217.87	231.54	249.49	500.36	473.48	103.88
scaffold2_19.7	175185	177917	MMPL family transporter	897	43.37	44.99	44.88	72.87	54.89	78.22	79.36	145.54	151.68	149.37	74.94
scaffold2_19.7	177914	180283	YhgE/Pip family protein	898	91.46	90.54	87.91	149.2	136.48	75.36	79.65	179	105.99	127.68	86.31
scaffold2_19.7	180305	180460	hypothetical protein	899	223.32	335.42	238.94	322.74	395.07	177.41	176.1	429.39	661.12	597.7	285.86
scaffold2_19.7	180469	181923	FtsX-like permease family protein	900	67.91	110.1	69.63	125.98	134.65	71.35	68.22	159.16	285.24	244.98	111.09
scaffold2_19.7	181917	182669	ABC transporter ATP-binding protein	901	22.2	23.8	20.38	48.99	29.91	60.15	57.37	156.02	198.86	171.13	41.98
scaffold2_19.7	182813	184270	NAD-dependent succinate-semialdehyde dehydrogenase	902	291.44	358.29	315.43	410.18	446.98	145.36	162.71	410.6	387.11	340.21	286.88
scaffold2_19.7	184315	185601	chloride channel protein	903	205.97	263.97	226.11	329.89	274.33	138.66	135.08	521.04	338.1	318.29	258.74
scaffold2_19.7	185656	188022	glycogen/starch/alpha-glucan phosphorylase	904	300.28	372.13	321.57	307.17	365.3	244.27	236.47	384.36	503.97	421.6	249.47
scaffold2_19.7	188087	188479	hypothetical protein	905	201.36	258.62	224.55	342	327.13	197.1	212.94	419.97	524.44	623.67	229.53
scaffold2_19.7	188476	189099	sigma-70 family RNA polymerase sigma factor	906	106.58	91.9	115.94	150.56	113.98	36.35	49.59	116.28	156.08	207.39	32.43
scaffold2_19.7	189298	191514	1,3-beta-galactosyl-N-acetylhexosamine phosphorylase	907	136.55	168.25	151.29	204.25	203.03	136.71	133.19	216.61	356.63	316.92	94.97
scaffold2_19.7	191670	192836	ROK family transcriptional regulator	908	161.38	145.68	161.2	287.31	276.91	188.47	181.18	285.15	581.14	623.27	361.09
scaffold2_19.7	193277	194596	carbohydrate ABC transporter substrate-binding protein	909	14.56	20.3	14.61	30.61	31.6	33.23	32.94	78.19	134.44	100.97	55.26
scaffold2_19.7	194697	195578	sugar ABC transporter permease	910	63.13	84.14	64.21	83.85	83.13	96.39	83	69.1	139.78	105.7	33.81
scaffold2_19.7	195575	196456	carbohydrate ABC transporter permease	911	154.6	254.25	179.88	206.58	227.92	283.32	263.63	255.99	284.53	269.42	152.04
scaffold2_19.7	196473	196649	hypothetical protein	912	135.16	244.34	183.48	158.47	211.95	176.68	147.14	327.86	253.39	289.95	289.62
scaffold2_19.7	196699	197715	substrate-binding domain-containing protein	913	110.22	157.75	125.01	128.71	141.22	81.89	86.49	329.98	328.14	383.62	276.76
scaffold2_19.7	197705	199906	glycoside hydrolase N-terminal domain-containing protein	914	68.07	90.38	72.13	128.73	115.89	96.66	98.25	178.27	261.28	273.47	97.04
scaffold2_19.7	199845	200444	RICIN domain-containing protein	915	8.08	9.96	11.51	33	24.95	14.02	9.74	111.24	0	0	0
scaffold2_19.7	200441	201319	hypothetical protein	916	13.32	12.94	12.66	29.75	28.62	18.08	18.85	72.49	0	0	0
scaffold2_19.7	201496	201867	hypothetical protein	917	105.19	84.59	109.85	116.38	134.92	59.59	70.82	185.09	0	0	0
scaffold2_19.7	202207	202386	acetyltransferase	918	59.86	64.71	66.99	131.71	157.39	21.17	34.05	98.83	93.86	31.59	21.95
scaffold2_19.7	202392	203624	6-phosphofructokinase	919	189.36	231.59	209.08	265.63	294.45	211.3	207.12	380.14	459.57	388.85	259.96
scaffold2_19.7	203662	204243	type IV toxin-antitoxin system AbiEi family antitoxin domain-containing protein	920	90.33	93.48	84.05	153.62	131.27	65.65	63.35	307.9	498.87	478.63	430.49
scaffold2_19.7	204240	206993	multicopper oxidase domain-containing protein	921	53.47	55.26	53.25	74.09	63.32	73.38	81.25	114.29	328.37	213.12	140.5
scaffold2_19.7	206986	208080	hypothetical protein	922	74.12	87.6	89.25	105.59	102.11	121.95	119.92	133.68	321.7	233.09	175.47
scaffold2_19.7	208549	210021	aspartate ammonia-lyase	923	1549.45	1387.57	1455.33	1007.09	953.02	777.98	704.88	1621.38	327.69	333.29	809.47
scaffold2_19.7	210028	211326	anaerobic C4-dicarboxylate transporter	924	1581.78	1340.65	1488.06	1118.89	976.22	1014.8	1036.54	1312.82	255.42	292.65	591.11
scaffold2_19.7	211427	211681	N-acetyltransferase	925	111.73	91.31	85.01	97.45	98.8	188.12	160.59	134.18	118.26	149.99	61.55
scaffold2_19.7	211820	213271	catalase	926	781.28	542.44	727.54	578.29	545.09	425.03	391.95	216.28	498.21	364.48	38.4
scaffold2_19.7	213309	215054	ABC transporter ATP-binding protein	927	238.56	264.93	244.14	258.03	243.83	108.4	126.53	200.01	259.09	265.65	64.75
scaffold2_19.7	215051	216679	ABC transporter ATP-binding protein	928	228.55	288.62	259.91	300.54	255.78	81.53	100.29	239.36	284.52	276.05	87.82
scaffold2_19.7	216814	217800	ATP-binding protein	929	236.97	332.88	268.66	241.25	260.32	80.11	84.36	129.65	245.03	187.04	34.75
scaffold2_19.7	217802	219709	magnesium chelatase subunit D family protein	930	199.11	292.54	236.64	225.22	217.19	75.36	83.97	183.2	299.35	310.26	167.48
scaffold2_19.7	219709	223614	cobaltochelatase subunit CobN	931	184.08	255.35	222.94	230.02	242.78	50.1	62.65	143.47	151.71	143.25	28.01
scaffold2_19.7	223611	224705	radical SAM protein	932	206.54	261.19	247.77	236.79	239.21	32.72	38.41	153.06	122.08	99.15	17.68
scaffold2_19.7	224702	225703	ABC transporter ATP-binding protein	933	314.14	409.3	358.31	445.48	390.85	79.97	96.27	169.28	332.71	236.23	70.89
scaffold2_19.7	225700	226839	iron ABC transporter permease	934	469.28	499.73	509.03	585.22	484.93	164.31	150.54	167.11	466.94	299.24	82.42
scaffold2_19.7	226922	228148	ABC transporter substrate-binding protein	935	640.36	618.79	682.67	560.5	525.08	166.17	173.77	135.22	440.16	333.06	59.96
scaffold2_19.7	228205	229455	ABC transporter substrate-binding protein	936	665.9	510.86	691.48	612.44	537.25	217.78	218.36	173.75	424.15	321.54	97.36
scaffold2_19.7	229757	230528	transcriptional regulator	937	83.77	102.58	91.63	141.8	134.4	86.74	86.7	142.9	250.38	202.55	42.91
scaffold2_19.7	230568	232352	oleate hydratase	938	65.4	88.06	67.51	334.43	282.09	101.45	92.74	96.55	271.09	242.15	36.83
scaffold2_19.7	232603	234180	bifunctional hydroxymethylpyrimidine kinase/phosphomethylpyrimidine kinase	939	133.01	162.83	141.76	205.8	241.67	179.42	193.5	336.64	1008.67	1240	202.22
scaffold2_19.7	234304	234534	hypothetical protein	940	44.14	55.06	47.76	100.64	74.75	55.47	74.05	169.25	950.46	1042.02	41.43
scaffold2_19.7	234543	235196	thiamine phosphate synthase	941	35.56	44.33	37.29	56.17	53.79	40.43	33.18	143.8	908.18	1093.32	40.59
scaffold2_19.7	235454	236413	DUF559 domain-containing protein	942	37.69	39.62	39.44	50.37	44.41	137.74	144.19	123.9	417.91	367.16	68.81
scaffold2_19.7	236783	236974	hypothetical protein	943	8.72	9.5	13.69	17.86	25.03	36.48	24.7	86.33	718.28	42.24	24.51
scaffold2_19.7	236971	237060	potassium-transporting ATPase subunit F	944	10.61	15.77	12.2	28.48	31.47	32.22	32.83	52.83	994.48	29.81	17.61
scaffold2_19.7	237060	238730	potassium-transporting ATPase subunit KdpA	945	21.22	27.3	26.12	39.76	27.73	128.85	119.64	107.78	1006.32	110.92	37.96
scaffold2_19.7	238733	240847	potassium-transporting ATPase subunit KdpB	946	82.43	106.46	86.33	124.53	110.57	100.24	104.86	199.03	1013.7	100.41	39.21
scaffold2_19.7	240860	241465	potassium-transporting ATPase subunit KdpC	947	59.58	69.73	64.68	140.43	118.13	170.55	166.14	130.42	989.16	359.44	159.18
scaffold2_19.7	241530	243998	sensor histidine kinase KdpD	948	193.7	226.08	189.68	272.18	305.98	132.63	133.19	239.29	945.42	309.12	168.08
scaffold2_19.7	243995	244678	response regulator transcription factor	949	116.72	177.86	123.43	152.63	200.28	118.53	129.67	212.83	958.59	210.77	123.82
scaffold2_19.7	244682	245206	EXLDI protein	950	160.51	178.52	151.03	376.9	635.31	137.15	121.22	397.29	999.18	588.8	449.24
scaffold2_19.7	245834	246076	hypothetical protein	951	63.1	74.18	86.7	74.39	60.87	47.11	52.32	67.49	0	0	0
scaffold2_19.7	246163	246429	hypothetical protein	952	73.63	76.66	88.36	96.91	74.98	97.53	64.67	89.52	0	0	0
scaffold2_19.7	246403	246597	hypothetical protein	953	72.02	74.66	66.45	97.15	82.65	153.89	111.88	82.94	0	0	0
scaffold2_19.7	246604	246816	hypothetical protein	954	99.18	112.89	95.17	165.63	143.72	144.87	132	150.65	0	0	0
scaffold2_19.7	247392	248642	insulinase family protein	956	100.6	125.12	112.82	164.37	155.83	85.93	93.03	279.48	218.07	187.66	126.42
scaffold2_19.7	248765	250036	insulinase family protein	957	145.78	165.13	172.48	173.94	197.92	121.37	133.22	220.79	481.81	512.47	339.6
scaffold2_19.7	250242	250661	DUF5318 family protein	958	521.98	682.31	578.74	710.29	844.75	493.76	563.79	302.51	531.61	490.82	386.73
scaffold2_19.7	250654	252993	transglycosylase domain-containing protein	959	345.08	517.6	387.73	444.51	500.03	645.37	614.55	631.31	572.8	619.58	710.93
scaffold2_19.7	253165	254550	DUF2029 domain-containing protein	960	326.32	427.39	354.26	362.28	339.25	381.19	339.03	595.38	682.84	714.74	933.78
scaffold2_19.7	254547	255722	hypothetical protein	961	255.9	341.15	282.69	276.1	268.9	286.89	313.18	492.42	615.05	672.72	618.62
scaffold2_19.7	255719	257056	hypothetical protein	962	233.01	315.77	256.85	263.75	226.57	151.1	143.13	491.3	541.81	628.18	632.76
scaffold2_19.7	257017	258279	glycosyltransferase	963	283.5	323.1	305.69	308.75	342.77	218.16	235.66	257.54	433.16	443.79	316.06
scaffold2_19.7	258547	259674	glycosyltransferase	964	355.16	462.9	388.32	392.65	486.01	449.34	483.05	976.69	662.08	644.93	932.94
scaffold2_19.7	259671	260993	O-antigen ligase family protein	965	353.57	483.78	405.66	392.35	417.22	591.4	610.82	911.83	863.99	922.48	761.98
scaffold2_19.7	260967	261743	chain-length determining protein	966	912.99	852.12	955.53	913.02	1028.76	580.67	677.33	468.5	796.18	850.64	259.35
scaffold2_19.7	261917	262534	N-acetyltransferase	967	2060.78	2309.29	2034.52	2150.04	2383.44	1825.08	1873.48	1138.81	991.33	1229.16	1904.91
scaffold2_19.7	262618	263730	DegT/DnrJ/EryC1/StrS family aminotransferase	968	1745.81	1659.14	1773.77	1667.63	1701.71	1974.49	1992.07	1014.37	948.73	1081.46	1060.61
scaffold2_19.7	263730	264722	Gfo/Idh/MocA family oxidoreductase	969	2018.57	1781.44	1967.68	2180.68	2092.41	2254.68	2354.74	1838.95	1050	1261.43	2085.35
scaffold2_19.7	264824	266206	O-antigen ligase family protein	970	160.29	242.99	202.34	196.05	178.75	443.15	393.09	432.8	539.3	563.11	494.67
scaffold2_19.7	266366	267988	MFS transporter	971	73.57	86.62	75.68	79.35	74.61	208.59	210.98	324.15	451.55	455.84	284.49
scaffold2_19.7	268231	269415	FAD-dependent oxidoreductase	972	497.1	528.81	507.29	582.92	660.92	191	207.07	747.25	691.41	755.19	230.6
scaffold2_19.7	269431	270231	SDR family oxidoreductase	973	541.62	516.72	570.51	586.68	640.09	245.11	244.37	777.78	972.45	965.98	426.83
scaffold2_19.7	270295	270552	HPr family phosphocarrier protein	974	589.46	556.26	569.8	554.54	650.65	422.77	456.81	741.29	1187.29	1345.11	367.19
scaffold2_19.7	270588	272600	PTS sugar transporter subunit IIA	975	101.73	84.98	99.23	110.54	85.58	77.28	81.56	348.79	319.45	341.69	225.28
scaffold2_19.7	272610	273584	1-phosphofructokinase family hexose kinase	976	84.18	69.64	87.6	100.41	86.44	69.86	70.67	358.26	222.97	222.28	223.34
scaffold2_19.7	273714	273898	hypothetical protein	977	56.19	53.02	65.52	71.47	63.3	56.68	62.93	201.73	308.79	367.61	178.78
scaffold2_19.7	273888	274649	DeoR/GlpR transcriptional regulator	978	262.65	273.09	323.27	349.59	382.8	309.53	345.94	161.96	464.83	482.7	161.73
scaffold2_19.7	274814	276112	nucleotide sugar dehydrogenase	979	1037.7	1140.53	1134.79	1259.81	1405.33	722.3	724.5	722.4	781.58	757.03	752.72
scaffold2_19.7	276096	277355	O-antigen ligase family protein	980	446.86	633.95	527.26	845.66	912.05	358.54	364.55	698.02	611.91	791.2	869.93
scaffold2_19.7	277474	278589	glycosyltransferase	981	603.61	678.89	642.48	752.8	716.29	607.95	581.23	1275.75	617.79	654.1	1068.76
scaffold2_19.7	278687	279760	UDP-N-acetylglucosamine 2-epimerase (non-hydrolyzing)	982	352.97	464.35	412.57	403.3	435.67	226.81	247.72	791.43	629.13	680.25	686.19
scaffold2_19.7	279760	280881	glycosyltransferase	983	208.01	289.71	234.42	239.05	276.14	162.94	170.55	837.06	578.2	586.2	591.26
scaffold2_19.7	280959	281108	toxin HicA	984	42.97	100.6	70.64	114.37	127.37	79.33	79.89	482.31	363.48	317.67	341.58
scaffold2_19.7	281228	282021	hypothetical protein	985	40.72	44.51	39.85	80.54	83.16	53.23	49.98	262.8	246.47	253.72	118.84
scaffold2_19.7	282401	282706	hypothetical protein	986	526.34	454.04	527.13	1286.78	1126.32	207.45	210.67	767.03	494.97	360.05	426.29
scaffold2_19.7	282693	284075	NAD(P)/FAD-dependent oxidoreductase	987	363.19	288.95	366.02	861.12	815.26	180.06	170.79	341.08	495.46	383.06	158.42
scaffold2_19.7	284203	284850	NUDIX hydrolase	988	308.35	368.99	332.57	22.86	10.12	77.41	104.45	202.25	241.97	182.79	160.72
scaffold2_19.7	284832	287348	ATP-dependent helicase HrpB	989	141.02	166.38	150.02	26.96	18.44	50.4	56.84	194.53	220.18	196.74	162.39
scaffold2_19.7	287656	288285	ECF transporter S component	990	83.32	121.46	105.23	102.97	112.37	74.24	74.36	178.23	849.76	1056.18	121.54
scaffold2_19.7	288282	290381	ATP-binding cassette domain-containing protein	991	86.35	98.2	95.72	110.81	131.83	69.85	68.57	200.9	617.03	746.95	64
scaffold2_19.7	290394	291569	glycosyltransferase family 4 protein	992	598.83	536.76	608.82	649.24	692.84	536.53	506.44	516.21	736.4	803.46	276
scaffold2_19.7	291662	292081	DoxX family membrane protein	993	1325.56	1179.09	1217.35	1358.6	1702.97	1259.35	1060.38	299.94	673.86	612.9	249.18
scaffold2_19.7	292648	293655	dihydroorotate dehydrogenase-like protein	994	1565.87	1221.26	1573.78	1851.38	1443.79	1075.04	1181.56	614.22	720.85	688.83	751.3
scaffold2_19.7	293679	297293	pyruvate:ferredoxin (flavodoxin) oxidoreductase	995	1829.5	1490.7	1951.04	1877.66	1640.9	756.82	923.18	250.31	504.33	432.27	136.57
scaffold2_19.7	297309	299126	NAD(P)-binding protein	996	1605.37	1475.43	1696.73	1472.07	1385.14	589.69	652.69	154.27	576.21	525.78	94.95
scaffold2_19.7	299375	299692	thiamine-binding protein	997	438.31	626.7	477.36	529.87	641.88	235.34	291.05	1064.43	686.58	596.38	529.49
scaffold2_19.7	299714	300376	FadR family transcriptional regulator	998	220.71	253.94	241.88	218.06	267.13	116.47	147.9	647.03	492.7	525.89	438.41
scaffold2_19.7	300870	302558	L-lactate permease	999	378.66	396.78	430.04	684.19	549.18	867.93	923.97	359.47	335.13	448.57	142.64
scaffold2_19.7	302601	303407	(Fe-S)-binding protein	1000	457.3	535.86	464.97	507.89	483.4	639.41	692.2	643.76	529.15	582.07	416.05
scaffold2_19.7	303411	304946	iron-sulfur cluster-binding protein	1001	311.27	387.54	330.19	376.54	349.09	574.51	598.81	721.93	477.46	537.16	505.9
scaffold2_19.7	304943	305623	lactate utilization protein C	1002	294.81	397.86	322.66	368.86	403.53	555.2	597.43	841.97	526.01	580.73	855.86
scaffold2_19.7	306258	306974	ATP-binding cassette domain-containing protein	1003	287.77	375.07	318.77	307.96	286.54	280.11	295.65	1037.55	0	0	0
scaffold2_19.7	306971	308209	hypothetical protein	1004	523.99	686.95	572.14	439.24	468.62	350.61	351.29	994.01	0	0	0
scaffold2_19.7	308206	308796	hypothetical protein	1005	548.31	714.35	603.32	336.93	340.57	366.81	353.53	875.56	0	0	0
scaffold2_19.7	308851	310455	thiol reductant ABC exporter subunit CydC	1006	431.55	606.22	483.31	433.05	385.66	190.2	200.06	368.63	305.26	305.86	211.12
scaffold2_19.7	310452	312068	thiol reductant ABC exporter subunit CydD	1007	565.6	726.58	636.51	649.51	499.55	310.64	345.79	234.26	412.5	430.44	203.07
scaffold2_19.7	312096	313169	cytochrome d ubiquinol oxidase subunit II	1008	3764.87	3068.02	3855.13	4363.89	3659.98	2337.56	2803.95	876.15	940.37	1009.61	725.14
scaffold2_19.7	313182	314702	cytochrome ubiquinol oxidase subunit I	1009	3750.29	3460.3	3736	3798.4	3851.93	2591.42	2727.52	891	940.86	981.23	880.4
scaffold2_19.7	314902	316407	APC family permease	1010	197.42	254.84	206.54	265.12	258.92	414.89	437.66	162.46	285.6	251.35	102.71
scaffold2_19.7	316518	318518	ABC transporter ATP-binding protein	1011	115.35	149.89	126.07	119.97	135.01	142.59	118.06	146.99	250.79	228.76	29.53
scaffold2_19.7	318515	320251	ABC transporter ATP-binding protein	1012	180.92	202.53	189.19	175.95	213.41	159.58	157.39	161.11	280.19	243.71	58.64
scaffold2_19.7	320524	320817	DNA-binding protein	1013	164.73	162.12	155.94	303.86	395.59	64.13	59.27	108.38	473.99	538.47	94.78
scaffold2_19.7	320919	322403	lysine--tRNA ligase	1014	310.4	402.19	352.89	389.7	333.15	343.97	363.64	767.47	649.32	712.9	485.54
scaffold2_19.7	322443	322724	cell division protein CrgA	1015	996.21	1186.49	1017.29	991.33	941.86	506.9	450.6	1817.44	987.66	979.45	1207.04
scaffold2_19.7	322846	323673	DUF881 domain-containing protein	1016	453.44	425.82	433.34	495.01	503.9	182.26	176.41	481.08	471.9	512.24	291.19
scaffold2_19.7	323764	325662	Stk1 family PASTA domain-containing Ser/Thr kinase	1017	478.97	524.01	486.36	421	397.62	314.03	334.59	225.09	539.24	562.56	257.47
scaffold2_19.7	325709	327136	penicillin-binding protein 2	1018	398.63	520.71	425.06	351.23	362.18	378.39	354.68	170.06	496.89	528.99	211.81
scaffold2_19.7	327133	328524	FtsW/RodA/SpoVE family cell cycle protein	1019	431.89	670.01	499.75	389.51	396.62	309.83	317.81	262.42	500.08	515.74	224.17
scaffold2_19.7	328521	330008	serine/threonine-protein phosphatase	1020	478.49	578.04	507.05	440.35	453.64	412.6	429.26	272.42	485.88	533.22	229.05
scaffold2_19.7	330012	330500	FHA domain-containing protein	1021	525.08	595.26	539.4	482.94	426.86	545.23	584.91	413.25	763.97	757.67	596.85
scaffold2_19.7	330503	331192	DUF3662 domain-containing protein	1022	1110.14	1322.6	1153.05	1085.9	1073.63	1072.53	1134.01	396.72	777.32	879.03	499.65
scaffold2_19.7	331363	332406	glycosyltransferase family 1 protein	1023	249.94	271.01	283.01	278.68	291.88	124.36	161.33	126.61	277.65	262.95	77.81
scaffold2_19.7	332634	333596	aminoglycoside phosphotransferase family protein	1024	537.23	597.17	537.37	589.07	676.83	354.73	377.75	115.25	227.68	302.64	39.14
scaffold2_19.7	334306	334971	hypothetical protein	1025	55.73	77.2	63.5	60.72	93.79	0	0	0	0	0	0
scaffold2_19.7	335012	335616	hypothetical protein	1026	41.01	45.52	42.6	49.79	54.46	0	0	0	96.37	96.42	13.94
scaffold2_19.7	335659	336244	hypothetical protein	1027	98.26	115.28	98.67	109.44	136.95	0	0	0	46.68	78.68	1.52
scaffold2_19.7	336241	336993	hypothetical protein	1028	79.71	120.52	88.76	100.03	103.73	0	0	0	0	0	0
scaffold2_19.7	337296	341364	RHS repeat protein	1029	59.85	78.26	63.98	144.38	136.34	53.93	58.84	318.56	177	203.69	262.36
scaffold2_19.7	341465	341645	ABC transporter ATP-binding protein	1030	27.6	35.6	25.82	24.75	32.16	33.3	24.79	75.95	77.48	99.16	4.49
scaffold2_19.7	341632	342478	hypothetical protein	1031	22.41	34.36	28.04	33.82	37.75	67.15	62.03	84.21	172.85	147.71	19.44
scaffold2_19.7	342989	343827	hypothetical protein	1032	44.31	84.22	48.5	53.23	54.35	272.43	241.05	490.91	554.45	483.3	467.38
scaffold2_19.7	344067	344512	hypothetical protein	1033	6.06	12.01	4.95	5.92	4.79	67.77	60.77	71.16	80.15	39.95	16.01
scaffold2_19.7	344494	345108	type IV secretion protein Rhs	1034	16.29	28.63	19.76	18.88	21.97	31.91	25.46	103.39	147.71	111.74	62.93
scaffold2_19.7	345635	345811	hypothetical protein	1035	15.65	19.41	16.21	17.31	29.6	20.59	18.3	67.57	135.37	112.59	24.15
scaffold2_19.7	346214	346701	type IV secretion protein Rhs	1036	9.81	15.24	11.44	17.5	16.63	91.4	85.94	75.7	190.16	218.63	78.82
scaffold2_19.7	346821	347543	hypothetical protein	1037	37.7	45.94	39.04	37.09	51.4	469.47	387.33	104.07	383.95	354.37	164.9
scaffold2_19.7	347912	348277	RNA-binding S4 domain-containing protein	1039	87.27	65.38	75.53	82.34	88.58	79.09	66.63	177.7	147.13	131.11	39.57
scaffold2_19.7	348539	348916	hypothetical protein	1041	126.55	144.84	141.12	214.36	159.96	585.56	643.92	472.9	394.34	429.16	409.93
scaffold2_19.7	348909	351857	DNA polymerase III subunit gamma and tau	1042	542.19	781.02	591.68	899.31	1045.26	359.91	404.29	512.78	436.47	466.63	529.93
scaffold2_19.7	351967	352290	YbaB/EbfC family nucleoid-associated protein	1043	916.74	1037.23	891.86	960.59	1048.6	822.25	838.46	957.9	758.01	789.74	839.66
scaffold2_19.7	352321	352926	recombination protein RecR	1044	435.64	630.6	461.34	480.9	538.68	720.73	700.94	933.42	684.6	754.28	770
scaffold2_19.7	353034	353609	PadR family transcriptional regulator	1045	1481.31	1160.69	1505.01	1132.13	977.43	430.66	411.53	730.17	619.28	677.67	487.64
scaffold2_19.7	353615	354397	ABC transporter ATP-binding protein	1046	898.38	835.29	964.12	939.41	697.61	291.46	275.1	521.87	547.86	706.61	464.13
scaffold2_19.7	354397	357036	ABC transporter permease	1047	376.94	509.3	421.02	312.59	294.68	90.9	91.55	356.3	439.58	517.05	443.44
scaffold2_19.7	357040	358467	threonine/serine exporter family protein	1048	191.56	219.7	199.99	204.07	203.3	97.75	100.03	218.87	361.38	374.61	127.86
scaffold2_19.7	358986	359786	HAD family phosphatase	1049	34.79	50.74	44.49	61.61	70.7	78.09	74.47	211.34	281.65	232.76	199.62
scaffold2_19.7	359796	360605	Cof-type HAD-IIB family hydrolase	1050	154.74	194.62	175.76	169.71	155.24	205.77	228.69	255.45	271.64	246.62	75.1
scaffold2_19.7	361319	361939	ATP-binding cassette domain-containing protein	1051	437.72	596.41	444.49	328.15	300.55	291.54	303.13	340.33	517.89	404.98	61.54
scaffold2_19.7	362275	363141	hypothetical protein	1052	282.63	442.08	318.57	198.19	204.35	140.57	126.6	280.86	452.5	309.12	28.85
scaffold2_19.7	363153	363743	hypothetical protein	1053	224.23	358.5	250.7	159.86	154.04	155.8	135.43	171.75	429.95	373.51	69.72
scaffold2_19.7	364387	367692	isoleucine--tRNA ligase	1054	413.1	486.03	408.62	414.48	402.88	396.59	401.05	277.5	496.08	503.64	272.02
scaffold2_19.7	367807	369186	serine dehydratase subunit alpha family protein	1055	173.67	158.77	176.38	168.55	148.59	107.92	107.7	230.48	206.47	261.68	215.03
scaffold2_19.7	369208	370467	hypothetical protein	1056	113.04	131.83	113.5	82.64	83.43	99.19	87.69	246.95	141.27	104.76	176.14
scaffold2_19.7	370481	370591	transporter	1057	14.85	13.24	12	11.39	10.96	27.03	25.56	87.49	158.25	65.35	44.13
scaffold2_19.7	370747	371757	Gfo/Idh/MocA family oxidoreductase	1058	25.17	26.62	23.04	28.55	27.57	26.45	27.46	129.93	181.69	166.57	151.64
scaffold2_19.7	371864	372163	WhiB family transcriptional regulator	1059	358.61	470.52	330.48	508.95	689.17	406.86	405.77	1196.97	812.32	1069.93	811.9
scaffold2_19.7	372160	372333	DUF4177 domain-containing protein	1060	604.49	752.09	625.08	722.85	736.29	537.1	561.41	1797.89	647.93	687.01	1119.24
scaffold2_19.7	372330	372785	RidA family protein	1061	898.8	1149.31	895.96	1293.61	1153.93	645.17	700.81	2415.19	831.55	961.53	1992.59
scaffold2_19.7	372868	373599	Crp/Fnr family transcriptional regulator	1062	723.39	648.58	687.6	731.06	714.28	504.95	520.51	580.91	534.54	597.19	302.8
scaffold2_19.7	373685	374413	endonuclease III	1063	262.46	350.06	295.42	308.15	343.57	212.18	185.6	316.18	330.47	214.63	208.3
scaffold2_19.7	374410	374997	TlpA family protein disulfide reductase	1064	182.75	254.52	198.91	207.75	256.06	118.57	112.56	296.33	333.69	344.71	253.15
scaffold2_19.7	375087	375650	CoA pyrophosphatase	1065	253.67	335.29	287.34	314.15	361.18	58.54	66.4	276.68	350.33	334.66	205.39
scaffold2_19.7	375732	376268	phage holin family protein	1066	1799.67	1674.01	1767.53	1407.93	1286.4	2867.43	2742.72	1154.7	697.38	714.66	1363.29
scaffold2_19.7	376365	377627	Na+/H+ antiporter NhaA	1067	577.17	777.86	620.25	559.48	641.56	921.65	878.19	266.59	402.47	413.5	259.22
scaffold2_19.7	377795	378673	class I SAM-dependent methyltransferase	1068	482.59	588.19	524.66	597	728.65	378.43	406.3	208.68	268.42	249.72	136.67
scaffold2_19.7	378682	379740	CpaE-like family protein	1069	5.38	4.39	5.46	10.86	9.83	5.59	9.87	105.4	83.07	101.16	20.62
scaffold2_19.7	379737	380903	TadA family conjugal transfer-associated ATPase	1070	31.49	28.13	28.83	34.51	35.86	40.86	45.17	124.58	53.69	58.4	30.84
scaffold2_19.7	380900	381670	pilus assembly protein TadB	1071	39.1	40.61	39.29	34.32	33.37	58.22	74.86	139.9	123.13	129.88	55.59
scaffold2_19.7	381667	381951	type II secretion protein F	1072	98.06	127.03	108.17	126.74	149.82	154.52	170.89	151.04	227.92	292.27	86.81
scaffold2_19.7	381973	382416	type II secretion system F family protein	1073	39.84	39.58	39.42	60.86	65.58	42.77	49.27	88.61	103.48	145.97	32.89
scaffold2_19.7	382625	382912	DUF4244 domain-containing protein	1074	19.57	26.09	17.67	20	27.62	20.28	27.14	82.73	180.83	138.9	36.3
scaffold2_19.7	383002	383320	hypothetical protein	1075	25.52	36.58	31.39	44.03	56.84	23.18	22.19	107.2	74.05	128.16	30.35
scaffold2_19.7	383317	383724	flp pilus-assembly TadE/G-like family protein	1076	32.9	26.36	30.25	45.19	49.29	20.62	23.25	105.48	106.62	59.67	36
scaffold2_19.7	384137	386401	DEAD/DEAH box helicase	1077	59.53	79.4	70.36	127.83	127.67	114.2	111.06	206.93	301.69	307.72	245.42
scaffold2_19.7	386425	387942	methyltransferase	1078	63.59	80.89	72.31	74.54	88.34	54.76	53.36	106.87	158.52	86.32	52.77
scaffold2_19.7	388035	388322	DUF2249 domain-containing protein	1079	98.63	114.82	106.64	122.46	114.76	328.26	278.54	213.54	464.38	293.56	512.15
scaffold2_19.7	388545	391337	type I DNA topoisomerase	1080	232.25	300.66	246.26	259.2	283.73	185.8	178.81	304.37	538.09	492.56	221.65
scaffold2_19.7	391339	392826	hypothetical protein	1081	145.34	202.97	163.81	187.23	201.29	85.79	82.77	409.26	440.18	463.55	374.51
scaffold2_19.7	392819	393463	dTMP kinase	1082	100.1	162.41	117.53	122.96	134.62	54.79	48.1	352.18	433.29	422.46	413.41
scaffold2_19.7	393510	394718	DNA polymerase III subunit delta'	1083	224.14	387.15	259.4	373.82	438.73	340.13	325.28	510.49	408.16	457.41	600.82
scaffold2_19.7	394850	395656	DoxX family protein	1084	2145.92	2009.8	2004.84	2136.47	2010.13	1433.39	1534.81	1238.88	882.81	1024.03	1568.05
scaffold2_19.7	395731	396393	hypothetical protein	1085	656.28	851.06	721.25	842.18	678.93	453.38	466.08	859.68	635.61	796	886.69
scaffold2_19.7	396653	398092	alpha/beta fold hydrolase	1086	242.21	372.67	267.83	241.84	227.26	254.02	243.93	396.82	321.4	369.24	269.5
scaffold2_19.7	398181	398513	hypothetical protein	1087	860.37	978.39	868.68	882.98	975.67	1109.05	1017.79	1395.03	1054.09	1285.23	1602.07
scaffold2_19.7	398547	400196	DUF885 domain-containing protein	1088	379.94	387.27	387.45	513.6	542.06	189.38	208.85	279.54	402.68	418.57	309.55
scaffold2_19.7	400635	401984	FAD-dependent oxidoreductase	1090	243.05	259.61	264.04	368.05	309.49	494.32	483.71	449.34	721.85	816.06	599.6
scaffold2_19.7	402381	403331	hypothetical protein	1091	444.47	487.75	435.38	461.12	523.87	175.59	199.49	440.5	737.63	706.17	265.93
scaffold2_19.7	403349	403834	histidine phosphatase family protein	1092	1328.69	2033.75	1455.86	1618.15	1854.8	246.23	256.34	1145.45	1068.04	995.76	220.67
scaffold2_19.7	403882	404872	acetylxylan esterase	1093	147.21	164.61	154.89	206.2	195.73	67.66	69.14	150.95	438.25	382.94	83.87
scaffold2_19.7	404888	405901	site-specific DNA-methyltransferase	1094	140	141.18	154.48	153.89	141.22	243.67	239.71	125.56	336.27	344.86	91.76
scaffold2_19.7	406012	406566	inorganic diphosphatase	1095	572.13	444.11	601.49	446.18	460.98	452.8	514.19	212.37	541.17	352.64	63.92
scaffold2_19.7	406693	408066	D-alanyl-D-alanine carboxypeptidase/D-alanyl-D-alanine-endopeptidase	1096	205.18	213.87	204.35	159.82	160.87	177.6	164.03	272.52	584.35	367.76	148.36
scaffold2_19.7	408066	409001	tRNA lysidine(34) synthetase TilS	1097	108.74	134.36	111.95	107.9	112.42	57.21	64.31	277.7	436.55	400.22	194.35
scaffold2_19.7	409029	409583	hypoxanthine phosphoribosyltransferase	1098	665.77	1112.76	682.89	721.8	828.22	731	658.04	1309.36	655.64	635.99	1266.25
scaffold2_19.7	409725	411878	ATP-dependent zinc metalloprotease FtsH	1099	387.99	479.6	419.63	443.1	413.82	428.03	390.8	1386.69	898.2	1070.99	935.08
scaffold2_19.7	411943	412518	GTP cyclohydrolase I FolE	1100	112.88	124.83	114.36	129.88	158.2	70.34	65.53	234.11	466.1	450.69	217.39
scaffold2_19.7	412582	412914	hypothetical protein	1101	51.58	64.64	50.67	75.41	88.17	39.28	42.05	177.69	279.09	321.58	93.63
scaffold2_19.7	412911	413108	ferredoxin	1102	24.08	38.14	31.39	38.85	45.03	24.41	34.84	78.75	69.77	56.35	11.56
scaffold2_19.7	413238	414329	OmpA family protein	1103	98.06	139.42	118.8	113.75	148.92	253.4	252.12	348.74	294.03	193.87	35.48
scaffold2_19.7	414487	414963	hypothetical protein	1104	113.44	144.97	126.09	129.42	131.16	183.8	189.6	459.37	391.04	322.15	101.85
scaffold2_19.7	415167	415691	Tat pathway signal sequence	1105	85.59	93.22	84.24	74.24	83.7	68.45	79.01	256.87	517.11	415.84	87.01
scaffold2_19.7	415721	416173	hypothetical protein	1106	35.71	42.12	37.35	36.67	43.88	20.98	27.32	185.05	357.6	329.65	68.39
scaffold2_19.7	416363	416539	hypothetical protein	1107	16.16	16.95	23.48	32.64	29.45	28.71	28.96	64.6	322.69	311.66	21.87
scaffold2_19.7	416576	417518	hypothetical protein	1108	19.93	28.2	22.36	27.07	32.23	66.56	62.76	133.97	264.95	279.46	51.63
scaffold2_19.7	417430	417894	hypothetical protein	1109	34.14	37.12	34.29	46.68	50.53	72.14	66.76	87.28	271.4	280.74	45.91
scaffold2_19.7	417951	418796	dihydropteroate synthase	1110	134.53	182.72	155.43	134.35	156.92	67.83	76.6	156.2	315.55	241.04	124.35
scaffold2_19.7	418857	419219	dihydroneopterin aldolase	1111	211.01	330.39	247.23	208.81	225.98	1012.93	973.5	475.75	863.35	918.87	388.45
scaffold2_19.7	419216	419761	2-amino-4-hydroxy-6- hydroxymethyldihydropteridine diphosphokinase	1112	130.29	161.79	155.76	176.22	147.65	244.82	230.28	405.14	688.24	680.39	274.4
scaffold2_19.7	419770	420306	DUF3180 domain-containing protein	1113	216.68	316.94	238.79	276.75	242.33	406.86	356.31	535.19	774.76	927.27	793.48
scaffold2_19.7	420389	421066	cell division topological specificity factor MinE	1114	2169.55	2166.05	2136.19	2847.56	2743.26	2670.63	2729.87	3236.11	1029.89	1237.21	3733
scaffold2_19.7	421143	422332	NADH-quinone oxidoreductase subunit D	1115	270.49	285.58	271.24	336.93	321.97	232.56	191.46	277.56	465.15	495.55	239.01
scaffold2_19.7	422471	422788	Lsr2 family protein	1116	2736.1	2670.02	2674.96	2707.6	2404.85	3601.8	3442.01	5114.06	1360.38	1668.73	5134.46
scaffold2_19.7	423051	425585	ATP-dependent Clp protease ATP-binding subunit	1117	809.98	898.41	816.25	989.07	1055.17	1007.01	1057.33	2346.45	1003.69	1180.37	1540.23
scaffold2_19.7	425638	426645	DUF2891 domain-containing protein	1118	222.76	261.86	247.9	272.34	257.71	178.2	156.91	647.1	635.71	656.79	437.06
scaffold2_19.7	426642	427628	DUF979 domain-containing protein	1119	100.58	84.5	96.65	83.07	76.79	106.2	97.54	127.93	234.81	174.8	47.09
scaffold2_19.7	427625	428389	DUF969 domain-containing protein	1120	91.93	84.62	96.36	65.3	56.81	80.04	58.84	66.53	224.85	143.79	45.57
scaffold2_19.7	428512	429282	LamB/YcsF family protein	1121	246.55	236.87	255.8	285.26	291.44	380.89	328.81	547.64	608.25	421.89	643.85
scaffold2_19.7	429279	429899	allophanate hydrolase subunit 1	1122	205.85	248.15	223.03	186.17	201.67	141.24	128.22	486.18	644.86	461.45	501.15
scaffold2_19.7	429896	430765	biotin-dependent carboxyltransferase family protein	1123	179.59	256.21	197.42	175.55	203.86	102.82	102.78	547.37	606.3	472.84	620.91
scaffold2_19.7	430929	432416	DHA2 family efflux MFS transporter permease subunit	1124	28.73	42.75	33.2	36.01	29.05	98.36	97.14	227.36	544.41	436.6	365.56
scaffold2_19.7	432484	433383	TIGR01777 family oxidoreductase	1125	398	518.52	401.96	369.54	394.47	408	410.12	493.36	651.02	774.91	578.02
scaffold2_19.7	433620	434288	rhomboid family intramembrane serine protease	1126	245.81	306.51	259.23	237.58	265.36	193.51	217.74	396.21	554.94	661.22	514.75
scaffold2_19.7	434306	434860	hypothetical protein	1127	383.47	605.51	443.14	423.88	513.12	178.35	173.21	417.74	413.57	468.42	199.34
scaffold2_19.7	434935	435591	response regulator transcription factor	1128	80.14	107.45	87.89	98.22	122.99	40.87	43.7	125.22	213.11	188.31	80.37
scaffold2_19.7	435671	436903	two-component sensor histidine kinase	1129	86.71	96.54	89.89	85.93	117.28	80.89	79.23	95.68	125.18	105.54	33.89
scaffold2_19.7	437156	437650	hypothetical protein	1130	92.35	110.59	92.54	76.05	66.98	1171.89	1011.98	233.85	73.24	48.89	5.22
scaffold2_19.7	437832	438743	PRD domain-containing protein	1131	24.39	26.24	29.45	25.01	24.8	48.68	44.7	94.17	71.08	64	10.81
scaffold2_19.7	438748	439221	PTS glucose transporter subunit IIA	1132	28.5	36.26	33.18	36.31	27.37	131.95	127.03	126.62	146.58	159.33	23.25
scaffold2_19.7	439233	440759	PTS transporter subunit EIIC	1133	40.97	52.95	46.61	43.66	56.31	95.37	96.47	110.63	146.36	128.06	24.37
scaffold2_19.7	440761	441054	N-acetylmannosamine-6-phosphate 2-epimerase	1134	25.74	24.99	27.59	17.46	23.65	74.85	74.35	98.28	246.64	273	40.14
scaffold2_19.7	441446	441668	hypothetical protein	1135	21.51	12.78	22.75	6.98	2.35	10.96	13.28	24.76	68.58	18.08	7.52
scaffold2_19.7	441584	442948	MFS transporter	1136	41.06	40.64	36.89	28.84	23.84	31.55	28.7	65.33	186.27	155.51	10.77
scaffold2_19.7	442948	443988	4-hydroxythreonine-4-phosphate dehydrogenase PdxA	1137	51.97	44.63	43.27	25.15	18.79	29.94	26.84	67.15	93.29	119.57	0
scaffold2_19.7	444064	445335	four-carbon acid sugar kinase family protein	1138	53.93	47.71	46.01	54.16	39.89	67.86	57.77	73.44	120.01	124.84	0
scaffold2_19.7	445569	446498	DeoR/GlpR transcriptional regulator	1139	323.73	398.98	338.81	332.19	321.73	510.04	445.66	202.16	481.04	440.61	0.11
scaffold2_19.7	446511	447386	A/G-specific adenine glycosylase	1140	317.49	483.48	376.89	393.04	415.02	244.21	239.11	463.62	582.73	632.23	472.36
scaffold2_19.7	447379	448689	glutamate-1-semialdehyde 2,1-aminomutase	1141	692.52	677.3	725.54	808.81	752.29	413.54	427.73	467.32	561.12	544.98	498.11
scaffold2_19.7	448736	449782	porphobilinogen synthase	1142	706.14	737.45	762.78	732.68	699.73	387.27	402.99	313.61	583.11	481.3	255.86
scaffold2_19.7	449812	450537	uroporphyrinogen-III synthase	1143	851.74	880.48	887.56	794.53	814.97	389.41	396.32	324.64	361.05	335.14	265.29
scaffold2_19.7	450534	451538	hydroxymethylbilane synthase	1144	869.4	1067.31	943.09	1018.76	1099.13	437.05	437.55	670.13	400.61	412.53	735.64
scaffold2_19.7	451584	453014	FAD-dependent oxidoreductase	1145	356.59	452.35	373.24	380.63	408.83	195.41	196.14	305.21	331.05	327.96	212.51
scaffold2_19.7	453029	454090	uroporphyrinogen decarboxylase	1146	407.02	474.01	432.42	408.16	463.77	118.69	122.13	168.1	338.18	336.22	212.76
scaffold2_19.7	454220	455554	glutamyl-tRNA reductase	1147	291.29	360.91	324.53	496.83	554.21	179.16	164.2	1272.54	784.19	813.92	1133.09
scaffold2_19.7	455551	457602	ferrochelatase	1148	253.61	340.25	280.75	413.6	479.43	257.02	243.23	681.47	725.52	702.28	683.32
scaffold2_19.7	457926	458306	hypothetical protein	1149	165.91	255.74	203.63	286.92	329.04	214.94	226.77	577.5	836.47	815.63	1029.76
scaffold2_19.7	458342	459445	DNA integrity scanning protein DisA	1150	347.83	456.84	380.21	509.97	579.84	328.98	322.7	748.46	818.52	854.86	570.93
scaffold2_19.7	459498	460895	DNA repair protein RadA	1151	156.07	267.3	196.01	430.65	513.56	431.74	424.81	736.71	548.68	626.22	627.87
scaffold2_19.7	460961	462587	NAD-dependent malic enzyme	1152	221.08	357.41	239.15	251.59	283.11	808.66	829.97	552.5	572.17	635.86	718.4
scaffold2_19.7	462672	463310	VOC family protein	1153	515.38	665.19	550.29	713.56	811.54	888.23	922.1	772.03	478.42	369.71	670.29
scaffold2_19.7	463523	464350	sugar phosphate isomerase/epimerase	1154	92.21	144.81	107.23	107.5	143.09	134.27	126.68	289.52	483.1	479.75	863.34
scaffold2_19.7	464413	465309	proline dehydrogenase family protein	1155	62.66	111.89	76.55	85.42	95.72	73.75	69.54	280.67	650.62	680.23	1000
scaffold2_19.7	465309	466145	CPBP family intramembrane metalloprotease	1156	71.1	92.78	82.33	102.69	108.44	105.03	101.52	250.01	573.2	625.67	552.56
scaffold2_19.7	466190	467233	aspartate-semialdehyde dehydrogenase	1157	718.32	984.15	746.42	882.2	969.29	1146.35	1115.09	969.17	736.94	809.25	1681.58
scaffold2_19.7	467230	468021	pyrroline-5-carboxylate reductase	1158	378.69	481.57	407.06	475.39	487.55	538.83	467.63	1072.9	815.4	888.05	1626.73
scaffold2_19.7	468157	468258	AURKAIP1/COX24 domain-containing protein	1159	823.62	1003.29	892.85	884.44	1036.06	1878.66	1592.07	2586.99	1006.59	1335.7	2084.42
scaffold2_19.7	468299	468619	glutaredoxin family protein	1160	739.13	1296.73	905.01	880.27	896.48	851	762.25	1201.93	805.92	1014.77	1058.61
scaffold2_19.7	468743	470458	uroporphyrinogen-III synthase	1161	136.68	230.79	178.02	191.14	179.54	144.8	131.07	530.61	521.37	572.48	301.23
scaffold2_19.7	470481	471197	histidine phosphatase family protein	1162	461.13	583.97	484.51	515.57	531.19	207.26	218.81	660.51	695.32	757.36	726.1
scaffold2_19.7	471194	471763	TlpA family protein disulfide reductase	1163	152.12	195.88	174.44	149.54	152.57	87.62	88.18	409.85	416.38	470.15	325.99
scaffold2_19.7	471811	472521	cytochrome C biogenesis protein CcdA	1164	89.58	130.17	102.32	90.37	85.61	51.2	55.11	273.4	322.47	396.68	219.81
scaffold2_19.7	472521	474110	cytochrome c biogenesis protein ResB	1165	110.63	164.14	124.83	95.34	100.78	81.2	78.41	285.2	304.19	298.41	183.56
scaffold2_19.7	474107	475000	c-type cytochrome biogenesis protein CcsB	1166	315.14	345.18	338.58	278.79	273.72	154.51	166.64	255.39	555.96	466.66	213.03
scaffold2_19.7	474987	476450	GerMN domain-containing protein	1167	350.52	463.17	381.79	362.68	382.61	843.35	777.91	382.68	848.1	783.77	355.21
scaffold2_19.7	476462	477256	SDR family oxidoreductase	1168	671.86	642.25	661.2	519.47	508.39	388.17	378.6	484.42	817.01	750.15	516.07
scaffold2_19.7	477468	477815	hypothetical protein	1169	92.69	98	87.76	81.67	82.11	90.92	87.33	93.03	0	0	0
scaffold2_19.7	477883	479934	hypothetical protein	1170	51.59	62.85	51.91	36.45	34.12	188.27	169.45	181.9	0	0	0
scaffold2_19.7	479970	480596	ABC transporter ATP-binding protein	1171	36.26	38.51	29.23	17.65	25.22	46.36	44.84	146.74	0	0	0
scaffold2_19.7	480633	480929	hypothetical protein	1172	42.38	64.1	46.67	25.75	32.34	33.03	31.63	105.49	0	0	0
scaffold2_19.7	480979	481683	DUF5134 domain-containing protein	1173	56.08	78.28	67.93	64.47	71.57	65.51	67.69	127.51	216.2	241.3	86.17
scaffold2_19.7	481808	483208	mycothione reductase	1174	18.03	14.32	16.82	23.67	22.84	36.28	33.35	56.18	381.92	380.01	389.34
scaffold2_19.7	483291	484112	ABC transporter substrate-binding protein	1175	22.85	27.24	29.99	41.21	41.08	203.3	210.36	63.69	556.64	397.06	67.2
scaffold2_19.7	484111	484296	hypothetical protein	1176	25.95	31.52	28.21	37.8	32.21	168.38	219.62	77.21	309.83	194.78	9.91
scaffold2_19.7	484319	485077	ABC transporter ATP-binding protein	1177	11.07	15.33	13.93	33.2	24.6	29.06	41.95	86.91	209.14	209.46	14.09
scaffold2_19.7	485074	486108	iron ABC transporter permease	1178	39.86	40.63	43.65	92.78	71.13	91.19	99.79	94.29	415.26	429.04	44.29
scaffold2_19.7	486337	487224	siderophore-interacting protein	1179	48.06	45.24	43.88	62.09	58.81	39.24	38.65	105.9	145.12	123.89	46.28
scaffold2_19.7	487451	488227	phosphate ABC transporter ATP-binding protein	1180	189.03	213.82	193.76	184.64	219.42	202.93	199.55	177.85	335.35	322.92	115.48
scaffold2_19.7	488246	489172	phosphate ABC transporter permease PstA	1181	126.62	175.14	139.06	110.27	160.5	103.54	97.1	97.93	136.24	114.44	35.58
scaffold2_19.7	489169	490173	phosphate ABC transporter permease subunit PstC	1182	126.26	131.36	140.75	93.92	95.37	74.03	69.71	90.43	89.93	77.57	27.5
scaffold2_19.7	490282	491433	phosphate ABC transporter substrate-binding protein PstS	1183	530.81	376.11	528.25	420.07	378.37	229.3	243.8	161.11	129.56	95.62	46.69
scaffold2_19.7	491606	492547	NUDIX hydrolase	1184	238.77	326.98	247.6	204.38	257.95	301.65	291.87	236.07	407.52	372.65	233.57
scaffold2_19.7	492555	494660	RNA degradosome polyphosphate kinase	1185	298.53	356.58	317.26	304.59	363.26	205.42	225.07	229.7	333.74	296.55	163.93
scaffold2_19.7	494782	495495	response regulator transcription factor	1186	313.64	431.29	320.13	341.93	369.65	764.82	758.84	404.18	414.74	414.61	470.52
scaffold2_19.7	495554	496438	hypothetical protein	1187	603.69	618.24	613.6	742.59	819.67	505.89	494.48	651.79	645.26	611.7	647.15
scaffold2_19.7	496453	496890	D-tyrosyl-tRNA(Tyr) deacylase	1188	615.21	785.65	591.63	710.43	764.22	312.27	343.72	844.54	573.92	565.29	974.07
scaffold2_19.7	497086	497586	FABP family protein	1189	538.07	636.18	549.29	714.72	746.76	449.43	527.3	794.53	640.19	596.03	1459.68
scaffold2_19.7	497588	498529	folate-binding protein YgfZ	1190	240.78	312.18	257.54	315.99	290.69	202.53	209.68	673.52	651.09	667.86	995.86
scaffold2_19.7	498570	499955	sugar transferase	1191	337.73	449.48	362.45	300.71	309.29	975.68	894.1	969.69	828.47	711.94	603.94
scaffold2_19.7	499978	500715	SDR family oxidoreductase	1192	582.75	584.07	603.27	460.34	414.15	582.6	565.55	746.67	972.98	794.59	706.96
scaffold2_19.7	500790	502463	phosphoenolpyruvate--protein phosphotransferase	1193	517.45	430.02	550.63	652.37	575.19	753.83	783.91	373.09	872.44	878.8	412.53
scaffold2_19.7	502468	502734	HPr family phosphocarrier protein	1194	441.87	372.67	432.33	480.18	529.19	452.63	531.63	389.02	837.23	800.02	255.72
scaffold2_19.7	502830	503633	2-C-methyl-D-erythritol 4-phosphate cytidylyltransferase	1195	227.23	314.44	249.25	246.2	300.96	568.28	567.99	828.82	580.99	562.84	634.13
scaffold2_19.7	503633	504136	2-C-methyl-D-erythritol 2,4-cyclodiphosphate synthase	1196	220.45	239.12	219.89	219.92	235.56	85.2	78.26	448.81	686.34	627.82	560.4
scaffold2_19.7	504083	504487	PTS glucitol/sorbitol transporter subunit IIA	1197	225.81	247.05	245.3	206.17	235.41	186.27	182.25	222.33	529.49	450.99	175.15
scaffold2_19.7	504685	504978	PTS sugar transporter subunit IIB	1198	683.14	676.89	588.5	854.42	1425.64	582.88	509.42	340.26	545.19	412.82	1902.45
scaffold2_19.7	505062	505547	CarD family transcriptional regulator	1199	1333.48	1687.68	1306.53	1308.93	1152.07	6252.12	6162.4	799.78	1006.61	1102.46	1125.81
scaffold2_19.7	505732	506292	hypothetical protein	1200	295.68	366.53	300.97	320.13	367.51	491.54	439.16	418.13	551.21	487.54	184.2
scaffold2_19.7	506345	507025	response regulator transcription factor	1201	242.83	341.67	252.99	238.6	271.45	175.11	172.55	294.78	619.29	535.7	140.7
scaffold2_19.7	507022	508203	two-component sensor histidine kinase	1202	277.8	261.19	274.63	256.82	273.79	132.65	134.34	146.01	315.28	248.63	93.91
scaffold2_19.7	508364	509032	phosphate signaling complex protein PhoU	1203	323.42	326.26	312.81	385.87	322.1	843.42	740.72	390.22	560.64	456.77	418.21
scaffold2_19.7	509174	509368	hypothetical protein	1204	510.26	586.6	537.65	342.8	368.95	191.94	160.63	227.42	429.18	371.99	287.97
scaffold2_19.7	509412	510248	polysaccharide deacetylase	1205	815.46	857.49	817.96	606.51	574.8	856.82	908.86	532.49	691.65	773.47	581.46
scaffold2_19.7	510357	511106	phosphoglyceromutase	1206	2648.83	2354.28	2541.52	2221.89	2288.58	2434.79	2358.37	1837.83	969.29	1216.94	2222.04
scaffold2_19.7	511231	511689	PTS sugar transporter subunit IIA	1207	60.38	79.88	58.75	54.73	73.63	72.03	77.15	166.58	193.63	212.03	124.08
scaffold2_19.7	511933	512226	PTS sugar transporter subunit IIB	1208	186.59	228.5	192.87	174.28	225.93	122.28	103.66	224.09	728.25	819.81	909.09
scaffold2_19.7	512432	513427	asparaginase	1209	70.87	82.09	75.25	68.21	67.45	49.27	48.78	84.85	458.96	330.16	45.43
scaffold2_19.7	513428	514876	amino acid permease	1210	97.86	113.04	109.71	99.03	105.77	72.99	77.82	76.17	563.96	445.55	83.34
scaffold2_19.7	515253	516728	glycine hydroxymethyltransferase	1211	916	945.29	943.85	874.35	1001.12	262.9	258.09	126.95	529.5	437.83	108.55
scaffold2_19.7	516843	517949	sugar kinase	1212	278.25	312.96	309.86	352.15	377.26	39.36	39.42	46.71	124.62	122.33	99.45
scaffold2_19.7	517946	518593	bifunctional 4-hydroxy-2-oxoglutarate aldolase/2-dehydro-3-deoxy-phosphogluconate aldolase	1213	373.41	252.95	369.96	358.06	383.81	88.01	98.11	89.99	202.63	252.44	23.12
scaffold2_19.7	518796	519572	3-ketoacyl-ACP reductase	1214	555.18	393.42	528	663.14	605.32	244.4	256.56	281.63	469.14	627.89	0
scaffold2_19.7	519574	521595	FAD-binding protein	1215	69.6	63.37	71.77	154.96	144.89	102	103	121.99	150.32	229.43	0.08
scaffold2_19.7	521620	522276	ThuA domain-containing protein	1216	4.02	5.66	4.76	12.36	6.6	17.57	12.67	50.57	41.14	38.25	0
scaffold2_19.7	522479	523186	sugar phosphate isomerase/epimerase	1217	11.11	10.4	9.93	32.94	17.42	10.12	7.78	79.69	41.18	30.67	0
scaffold2_19.7	523183	523998	Gfo/Idh/MocA family oxidoreductase	1218	72.73	84.17	76.1	76.98	55.91	26.87	21.58	73.68	84.18	128.46	0
scaffold2_19.7	524138	524470	dehydrogenase	1219	465.64	532.92	522.79	495.67	505.06	91.56	118	236.34	223.45	341.27	0
scaffold2_19.7	524524	526965	polysaccharide lyase 8 family protein	1220	1149.67	907.75	1200.42	1217.29	1154.2	428.7	471.27	281.71	253.08	301.28	0.03
scaffold2_19.7	527127	527999	DUF2264 domain-containing protein	1221	332	323.48	315.77	421.32	461.56	274.58	258.78	366.9	615.62	719.71	0
scaffold2_19.7	528013	528657	DUF2264 domain-containing protein	1222	137.19	141.36	143.02	210.16	211.53	105.7	117.23	254.31	248.16	325.64	0
scaffold2_19.7	528727	528918	hypothetical protein	1223	342.9	457.5	355.97	642.74	622.62	269.09	303.16	722.14	402.29	602.77	0
scaffold2_19.7	528902	529858	23S rRNA (guanosine(2251)-2'-O)-methyltransferase RlmB	1224	490.96	597.3	540.8	700.33	754.87	609.08	608.17	890.64	701.61	809.41	30.81
scaffold2_19.7	529872	531344	cysteine--tRNA ligase	1225	495.88	676.94	494.18	550.18	637.88	373.2	371.58	408.87	441.66	451.11	374.82
scaffold2_19.7	531351	531569	hypothetical protein	1226	505.89	622.14	464.64	955.47	1161.58	102.11	140.6	112.44	771.1	813.36	106.67
scaffold2_19.7	531580	532998	DUF4032 domain-containing protein	1227	503.77	637.29	538.49	619.1	745.86	111.71	109.67	103.8	546.38	485.37	234.03
scaffold2_19.7	533251	533769	Asp23/Gls24 family envelope stress response protein	1228	2682.46	2347.88	2693.47	2669.8	2467.63	21.79	29.15	77.03	762.36	831.54	309.46
scaffold2_19.7	533781	533966	DUF2273 domain-containing protein	1229	2488.92	2342	2546.17	1986.27	1656.61	208.65	164.37	445.64	888.55	1042.86	453.02
scaffold2_19.7	533966	534379	Asp23/Gls24 family envelope stress response protein	1230	3572.04	3185.64	3493.02	2799.19	2605.23	168.42	194.14	462.59	787.14	952.57	533.74
scaffold2_19.7	534381	534935	hypothetical protein	1231	2962.49	2761.13	2952.77	1958.19	2077.93	11.87	11.98	37.77	651.54	727.65	526.39
scaffold2_19.7	534932	535648	alkaline shock response membrane anchor protein AmaP	1232	3859.41	3705.09	3752.82	2304.41	2096.2	30.66	26.19	87.33	623.35	693.39	783.37
scaffold2_19.7	535705	536280	sigma-70 family RNA polymerase sigma factor	1233	1085.51	1293.35	1153.56	686.62	728.58	7.48	12.14	7.66	584.77	652.33	467.8
scaffold2_19.7	536271	536795	Asp23/Gls24 family envelope stress response protein	1234	930.52	1074.46	952.13	654.17	623.3	39.65	58.66	26.95	601.33	555.47	308.29
scaffold2_19.7	536788	537138	hypothetical protein	1235	742.68	698.49	710.96	461.5	555.83	103.11	142.9	69.31	513.52	352.53	294.06
scaffold2_19.7	537204	538304	sn-glycerol-3-phosphate ABC transporter ATP-binding protein UgpC	1236	1076.21	743.41	1007.44	954.01	777.59	518.77	538.9	342.08	653.2	612.69	200.21
scaffold2_19.7	538966	540402	L-serine ammonia-lyase	1237	209.53	228.61	214.39	272.93	276.1	293.87	278.98	459.67	376.63	313.08	339.25
scaffold2_19.7	540427	540675	hypothetical protein	1238	6.46	5.47	7.17	9.21	10.07	7.21	8.15	40.37	26.44	16.36	0.7
scaffold2_19.7	540710	543070	ROK family protein	1239	58.81	66.89	64.02	114.66	137.9	73.75	73.36	335.16	168.78	160.64	56.36
scaffold2_19.7	543093	544385	sugar ABC transporter substrate-binding protein	1240	44.14	70.68	51.9	71.57	93.41	45.3	37.2	114.05	136.52	116.69	23.79
scaffold2_19.7	544382	545338	sugar ABC transporter permease	1241	63.66	98.04	70.31	93.44	120.62	77.6	85.71	106.74	99.34	91.05	33.44
scaffold2_19.7	545331	546221	carbohydrate ABC transporter permease	1242	82.04	128.31	85.36	85.02	105.99	67.41	66.28	121.55	193.97	181.5	43.09
scaffold2_19.7	546575	547612	L-threonine 3-dehydrogenase	1243	467	349.84	438.34	470.5	397.94	193.54	197.52	154.22	201.15	194.95	158.58
scaffold2_19.7	547650	548834	glycine C-acetyltransferase	1244	658.6	539.1	647.37	495.01	447.25	451.06	422.07	238.78	331.76	318.4	183.53
scaffold2_19.7	548851	549786	ABC transporter substrate-binding protein	1245	287.93	346.97	288.56	284.96	310.72	212.74	228.6	221.51	383.48	379.73	166.34
scaffold2_19.7	549796	550491	ABC transporter permease subunit	1246	70.53	88.28	70.14	73.47	65.92	80.05	76.61	149.14	333.44	366.86	148.97
scaffold2_19.7	550488	551135	ABC transporter permease subunit	1247	59.62	81.51	60.1	65.02	61.57	99.37	85.5	178.22	504.48	473.34	203.62
scaffold2_19.7	551132	551968	ATP-binding cassette domain-containing protein	1248	187.69	274.24	204.16	308.14	307.34	721.64	681.3	536.8	476.55	434.69	273.83
scaffold2_19.7	552088	552918	VTT domain-containing protein	1249	217	256.73	238.64	339.32	404.71	250.76	254.68	709.74	926.58	963.07	836.25
scaffold2_19.7	552943	553305	DUF488 family protein	1250	400.2	500.33	385.26	330.61	383.09	238.95	217.99	751.95	893.12	812.78	698.9
scaffold2_19.7	553336	553851	O-acetyl-ADP-ribose deacetylase	1251	340.63	401.35	330.03	314.51	309.94	265.56	248.86	369.21	810.26	640.39	342.44
scaffold2_19.7	553969	554985	NADP-dependent oxidoreductase	1252	218.12	187.62	228.32	299.02	275.4	142.91	139.31	562.23	610.52	388.24	153.63
scaffold2_19.7	555117	556064	ABC transporter ATP-binding protein	1253	51.26	49.55	45.24	48.87	45.71	41.7	35.39	155.68	694.87	746.34	113.42
scaffold2_19.7	556061	556810	ABC transporter permease	1254	32.02	36.42	32.88	30.13	39.17	32.89	28.77	78.91	911.41	1108.89	178.32
scaffold2_19.7	556872	558027	histidine kinase	1255	45.49	52.07	46.84	54.33	58.19	71.81	59.36	132.4	532.48	669.58	166.73
scaffold2_19.7	558032	558652	response regulator transcription factor	1256	64.39	73.89	64.48	93.13	104.21	107.58	103.22	172.83	484.55	684.58	220.85
scaffold2_19.7	558925	559659	histidine phosphatase family protein	1257	85.71	100.55	76.94	95.86	114.12	87.22	90.96	246.46	624.54	666.43	764.49
scaffold2_19.7	559549	560577	cobalamin biosynthesis protein CobD	1258	573.83	650.82	584.75	722.72	758.02	169.58	203.12	366.41	249.91	282.6	222
scaffold2_19.7	560577	562049	cobyric acid synthase	1259	253.01	334.42	267.5	293.43	320.61	114.2	118.97	342.82	281.57	317.94	222.26
scaffold2_19.7	562366	563121	precorrin-2 C(20)-methyltransferase	1260	633.88	645.78	655.25	563.39	598.52	287.66	307.66	280.15	425.29	412.95	185.83
scaffold2_19.7	563118	564089	precorrin-4 C(11)-methyltransferase	1261	439.4	440.61	463.69	393.07	474.05	201	214.94	233.26	510.62	470.35	281.6
scaffold2_19.7	564086	566656	precorrin-3B C(17)-methyltransferase	1262	378.52	433.44	399.23	360.87	410.16	219.81	214.61	353.03	536.97	472.32	287.59
scaffold2_19.7	566653	567921	cobalamin biosynthesis protein	1263	371.87	454.92	398.46	404.33	425.3	515.08	531.7	792.81	712.44	702.52	767.41
scaffold2_19.7	567963	568829	hypothetical protein	1264	420.3	569.23	460.67	483.33	519.75	192.05	209.16	572.09	762.21	697.22	299.45
scaffold2_19.7	569268	569405	23S rRNA methyltransferase	1265	22.9	34.79	31.23	31.95	29.53	54.54	59.71	234.9	32.28	30.81	82.52
scaffold2_19.7	569764	570783	iron ABC transporter permease	1266	13.5	15.1	12.57	27.66	21.99	25.66	27.81	94.02	137.79	200.02	22
scaffold2_19.7	570780	571571	ABC transporter ATP-binding protein	1267	9.05	10.78	9.13	16.59	11.93	12.43	18.03	73.91	153.04	172.85	14.61
scaffold2_19.7	571573	572643	ABC transporter substrate-binding protein	1268	27.57	32.34	27.7	28.56	24.94	75.96	64.72	80.9	377.12	288.36	74.61
scaffold2_19.7	572719	573377	DUF4143 domain-containing protein	1269	37.11	49.68	40.83	34.2	35.08	41.76	44.08	80.43	115.75	81.99	19.02
scaffold2_19.7	573513	574232	precorrin-8X methylmutase	1270	98.1	100.37	102.36	74.76	92.42	74.39	67.36	144.05	253.32	198.21	26.9
scaffold2_19.7	574471	575154	energy-coupling factor ABC transporter permease	1271	1667.32	1233.02	1561.65	1541.53	1498.66	486.56	450.94	1117.32	507.91	452.34	450.86
scaffold2_19.7	575147	575581	energy-coupling factor ABC transporter substrate-binding protein	1272	1394.47	975.72	1227.87	1503.05	1269.31	244.42	259.55	508.52	557.48	459.9	150.49
scaffold2_19.7	575578	576423	cobalt ECF transporter T component CbiQ	1273	684.86	581.67	667.51	578.39	550.84	89.97	90.15	165.44	309.38	348.37	106.89
scaffold2_19.7	576420	577256	ATP-binding cassette domain-containing protein	1274	334.25	358.73	346.83	335.73	342.12	38.41	43.53	165.47	148.47	151.49	97.95
scaffold2_19.7	577309	577998	DUF4118 domain-containing protein	1275	323.97	361.44	338.98	358.04	373.16	251.75	234.6	428.78	691.13	580.93	359.94
scaffold2_19.7	578021	578617	precorrin-6Y C5,15-methyltransferase (decarboxylating) subunit CbiT	1276	307.77	385.55	334.42	389.84	388.31	333.74	326.82	581.76	713.1	539.05	377.77
scaffold2_19.7	578846	579460	cob(I)yrinic acid a,c-diamide adenosyltransferase	1277	156.95	147.87	147.27	211.95	213.86	83.49	106.51	334.11	404.52	380.65	414.94
scaffold2_19.7	579460	581883	cobyrinate a,c-diamide synthase	1278	176.12	193.18	181.45	204.75	213.56	157.16	142.78	226.47	268.11	258.5	138.17
scaffold2_19.7	581893	582669	uroporphyrinogen-III C-methyltransferase	1279	211.52	269.69	224.35	200.7	242.59	147.64	149.44	287.3	440.55	383.82	293.37
scaffold2_19.7	582689	583441	cobalt-precorrin-6A reductase	1280	219.16	216.69	200.15	190.59	207.6	86.34	96.17	285.07	382.45	356.23	369.14
scaffold2_19.7	583665	585335	nicotinate-nucleotide--dimethylbenzimidazole phosphoribosyltransferase	1281	174.5	181.61	172.04	207.29	182.22	107.41	107.81	187.37	243.9	263.83	123.98
scaffold2_19.7	585332	586171	adenosylcobinamide-GDP ribazoletransferase	1282	135.09	188.36	148.17	175.3	163.87	56.38	59.57	176.09	251.37	276.1	144.96
scaffold2_19.7	586168	586932	cobalamin-binding protein	1283	125.62	164.03	140.44	119.65	151.92	101.92	97.46	252.87	288.05	341.19	269.96
scaffold2_19.7	587155	588561	hypothetical protein	1285	303.23	323.71	350.65	292.23	222.36	220.46	227.95	102.68	208.6	183.73	42.8
scaffold2_19.7	588843	588995	triacylglycerol lipase	1286	573.14	586.95	661.08	494.15	429.2	273.11	250.57	51.2	73	92.41	16.01
scaffold2_19.7	588995	589194	hypothetical protein	1287	586.34	731.02	684.57	662.71	578.77	359.48	328	63.65	247.62	281.35	32.68
scaffold2_19.7	589216	589404	hypothetical protein	1288	226.51	316.29	278.95	271.26	262.42	208.55	173.27	64.37	258.52	242.22	66.1
scaffold2_19.7	589442	591031	PTS ascorbate transporter subunit IIC	1289	50.99	62	55.53	53.64	53.46	41.17	44.62	105.4	225.62	200.69	79.44
scaffold2_19.7	591081	591845	PTS sugar transporter subunit IIA	1290	93.17	102.04	86.95	87.08	102.92	100.5	91.67	124.55	429.22	349.75	31.69
scaffold2_19.7	591914	592074	S-ribosylhomocysteine lyase	1291	85	84.74	87.8	140.33	136.48	52.12	57.37	86.6	109.04	134.21	11.81
scaffold2_19.7	592907	593292	hypothetical protein	1292	281.55	312.74	277.54	306.23	355.61	1198.15	875.53	322.03	695.95	796.39	100.01
scaffold2_19.7	593381	593860	hypothetical protein	1293	229.87	243.15	206.83	200.65	181.15	378.54	339.67	297.85	563.08	667.73	67.35
scaffold2_19.7	594010	594492	S-ribosylhomocysteine lyase	1294	470.58	650.81	442.43	425.44	577.14	412.5	368.72	266.32	408.45	444.45	271.7
scaffold2_19.7	594530	595711	mannose-6-phosphate isomerase, class I	1295	240.78	297.06	262.74	255.53	298.75	165.73	162.24	109.7	196.28	182.81	120.08
scaffold2_19.7	595756	596040	DUF3263 domain-containing protein	1296	633.65	659.39	615.58	621.63	758.39	190.28	209.4	224.14	308.82	319.44	285.83
scaffold2_19.7	596375	598009	chaperonin GroEL	1297	7714.91	4861.91	6914.31	8001.22	7356.98	5012.61	5144.32	5676.74	1013.32	1084.78	6459.07
scaffold2_19.7	598147	599217	transaldolase	1298	323.07	318.5	325.42	370.34	277.59	152.66	128.74	158.38	266.32	379.93	164.39
scaffold2_19.7	599319	600062	GntR family transcriptional regulator	1299	319.57	319.41	340.32	245	287.06	94.93	108.23	78.28	124.45	94.92	13.34
scaffold2_19.7	600277	601266	5-dehydro-2-deoxygluconokinase	1300	92.92	76.84	82.94	161.32	131	72.63	59.46	92.16	139.06	195.8	66.79
scaffold2_19.7	601263	602150	deoxyribose-phosphate aldolase	1301	99.47	105.32	96.31	149.43	172.3	62.22	59.48	89.47	183.54	170.66	71.42
scaffold2_19.7	602147	603019	5-deoxy-glucuronate isomerase	1302	180.05	158.56	179.82	187.06	243.62	72.29	77.17	79.02	202.58	216.73	102.21
scaffold2_19.7	603022	604920	3D-(3,5/4)-trihydroxycyclohexane-1,2-dione acylhydrolase (decyclizing)	1303	203.55	185.58	207.86	212.39	201.29	124.25	122.52	127.45	284.74	251.76	55.14
scaffold2_19.7	605065	605301	hypothetical protein	1304	563.19	550.27	612.82	918.51	904.75	1993.27	1782.07	295.67	710.75	656.83	323.47
scaffold2_19.7	605666	607159	CoA-acylating methylmalonate-semialdehyde dehydrogenase	1305	92.5	81.93	95.75	124.19	112.71	113.78	97.94	105.33	167.37	161.05	142.3
scaffold2_19.7	607288	608235	LacI family DNA-binding transcriptional regulator	1306	140.67	190.03	162	210.14	185.66	926.68	933.44	579.11	277.19	307.31	146.74
scaffold2_19.7	608373	609587	Gfo/Idh/MocA family oxidoreductase	1307	3.01	2.35	2.49	4.3	4.38	26.86	18.36	54.25	55.73	61.18	145.45
scaffold2_19.7	609632	610630	sugar phosphate isomerase/epimerase	1308	2.53	4.89	3.17	2.72	2.75	15.76	11.05	31.42	44.25	52.68	111.28
scaffold2_19.7	610696	611568	sugar phosphate isomerase/epimerase	1309	6.95	15.42	10.53	14.55	15.2	53.51	51.38	52.47	81.32	75.19	131.4
scaffold2_19.7	611778	612989	Gfo/Idh/MocA family oxidoreductase	1310	38.71	34.07	36.56	155.92	188.8	105.73	111.45	129.62	74.31	61.72	51.43
scaffold2_19.7	613138	614743	MFS transporter	1311	40.3	43.22	36.84	68.61	73.45	92.35	84.94	94.01	182.89	178.39	61.76
scaffold2_19.7	614916	615071	alcohol dehydrogenase	1312	126.06	119.34	133.94	279.12	304.85	751.83	846.18	215.17	163.75	135.86	21.37
scaffold2_19.7	615105	615244	alcohol dehydrogenase	1313	50.71	53.13	52.59	86.82	65.33	298.79	293.24	154.57	65.02	26.57	10.59
scaffold2_19.7	615363	616268	TIM barrel protein	1314	94.43	45.7	85.62	203.78	157.13	52.01	46.21	53.96	68.09	54.13	10.56
scaffold2_19.7	616424	617410	inositol 2-dehydrogenase	1315	90.86	79.69	79.55	178.37	126.13	396.15	370.23	96.89	180.28	212.25	106.96
scaffold2_19.7	617616	618425	CPBP family intramembrane metalloprotease	1316	47.06	65.49	56.03	81.27	73.28	139.11	131.89	251.16	344.91	318.21	127.1
scaffold2_19.7	618412	619098	copper homeostasis protein CutC	1317	162.73	223.2	175.35	197.06	187.77	199.74	191.31	322.75	468.28	429.28	208.64
scaffold2_19.7	619112	619945	serine hydrolase	1318	300.05	413.02	355.2	327.78	402.2	391.1	403.58	822.89	600.76	492.92	502.12
scaffold2_19.7	620160	621818	DEAD/DEAH box helicase	1319	376.16	496.65	460.19	504.02	633.36	857.82	852.94	1477.06	335.95	273.43	517.14
scaffold2_19.7	622252	622407	thiol peroxidase	1320	95.84	103.04	111.53	108.69	89.25	110.96	121.96	141.15	506.23	672.43	221.02
scaffold2_19.7	622453	624582	helicase-associated domain-containing protein	1321	427.01	534.61	465.08	366.27	450.43	219.84	250.54	175.81	465.7	480.38	338.92
scaffold2_19.7	624579	624953	hypothetical protein	1322	531.88	807.69	598.98	557.49	600.67	603.58	598.99	158.51	434.95	403.25	118.21
scaffold2_19.7	625059	625400	hypothetical protein	1323	879.96	1042.11	889.78	1220.38	1465.71	217.59	312.88	110.37	241.61	267.27	23.04
scaffold2_19.7	625508	626293	glucosamine-6-phosphate deaminase	1324	145.52	192.77	166.1	219.97	191.54	116.7	107.23	67.86	679.26	358.8	154.44
scaffold2_19.7	626440	626823	cold-shock protein	1325	1539.02	1674.42	1467.09	2134.37	2174.61	3245	3163.56	3166.46	941.51	1072.34	5139.04
scaffold2_19.7	626823	627623	DUF3027 domain-containing protein	1326	1035.5	1094.95	1016.51	1222.39	1146.57	719.12	725.15	1601.85	876.93	936.62	2995.66
scaffold2_19.7	627661	627933	DUF2530 domain-containing protein	1327	597.17	718.97	599.28	473.37	445.45	871.59	887.5	784.51	997.98	991.87	847.56
scaffold2_19.7	628057	629460	NCS2 family permease	1328	104.42	129.2	113.4	130.79	133.74	114.82	101.26	197.89	323.57	255.48	125.59
scaffold2_19.7	629435	630145	hypothetical protein	1329	227.74	282.47	230.67	241.7	323.41	154.71	157.73	117.73	351.28	352.85	159.19
scaffold2_19.7	630455	631291	hypothetical protein	1330	248.91	280.11	254.08	233.6	239.17	202.87	211.46	481.47	716.92	732.84	903.79
scaffold2_19.7	631288	632451	phosphoserine transaminase	1331	272.96	261.33	264.34	292.28	284.47	119.12	115.9	217.72	446.84	388.56	164.27
scaffold2_19.7	632499	633629	N-acetylglucosamine-6-phosphate deacetylase	1332	606.95	525.25	572.13	589.56	555.72	451.22	391.74	723.41	706.42	618.43	670.19
scaffold2_19.7	633759	634481	metal-dependent transcriptional regulator	1333	853.65	862.92	828.97	1057.58	1121.9	1039.67	955.62	1318.98	800.34	858.14	803.17
scaffold2_19.7	634502	635581	hypothetical protein	1334	323.4	438.08	358.21	422.06	498.54	305.19	270.27	478.14	406.3	429.54	270.43
scaffold2_19.7	635631	636068	thioredoxin	1335	1082.73	969.28	1143.14	1666.13	1742.91	9119.11	8484.22	9517.88	945.66	1062.36	6053.96
scaffold2_19.7	636239	637855	MFS transporter	1336	166.44	217.46	196.98	264.03	253.2	586.51	613.17	1121.06	509.11	517.18	1482.74
scaffold2_19.7	638339	639736	UTP--glucose-1-phosphate uridylyltransferase	1338	381.87	338.87	381.41	320.61	313.34	338.11	329.98	245.39	479.92	415.25	146.81
scaffold2_19.7	639733	640104	hypothetical protein	1339	313.43	305.67	295.3	329.99	333.23	270.82	236.03	328.02	654.65	839.08	217.2
scaffold2_19.7	640127	640495	large conductance mechanosensitive channel protein MscL	1340	197.31	193.67	201.17	154.42	164.23	164.26	160.36	197.61	546.22	517.12	85.36
scaffold2_19.7	640607	641107	SAF domain-containing protein	1341	75.9	100.74	85.45	109.84	141.19	94.87	90.85	108.82	199.35	167.76	27.53
scaffold2_19.7	641346	641648	zinc ribbon domain-containing protein	1342	333.77	341.85	331.92	419.8	527.45	218.5	235.98	227.25	640.33	509.54	186.72
scaffold2_19.7	641726	642313	5-formyltetrahydrofolate cyclo-ligase	1343	585.47	973.3	653.33	644.13	654.24	514.04	426.92	327.26	481.88	389.57	497.53
scaffold2_19.7	642423	643730	molybdopterin biosynthesis protein	1344	1347.27	1529.29	1314.39	1373.24	1595.86	670.65	704.67	470.55	476.07	528.2	879.02
scaffold2_19.7	643798	644442	GNAT family N-acetyltransferase	1345	532.7	691.04	561.05	595.06	737.02	250.05	269.91	295.26	437.18	558.33	562.87
scaffold2_19.7	644524	645318	hypothetical protein	1346	1179.64	1800.75	1251.64	1236.14	1401.42	1985.07	2205.77	1017.48	675.64	753.76	2002.02
scaffold2_19.7	646067	646741	molecular chaperone TorD family protein	1348	193.26	295.45	204.35	175.66	199.03	143.16	150.55	202.11	469.96	524.29	139.42
scaffold2_19.7	646738	647223	cyclic pyranopterin monophosphate synthase MoaC	1349	171.73	228.18	187.84	171.31	185.4	91.72	98.5	333.76	486.23	549.1	285.58
scaffold2_19.7	647220	648551	molybdopterin molybdotransferase MoeA	1350	198.31	244.05	218.04	211.58	228.46	97.36	101.55	218.48	355.37	384.58	197.49
scaffold2_19.7	648521	648943	molybdenum cofactor biosynthesis protein MoaE	1351	210.09	247.64	217.49	239.21	258.66	155.88	120.95	233.51	643.61	719.71	397.82
scaffold2_19.7	648944	649183	MoaD/ThiS family protein	1352	240.83	274.58	255.76	293.4	410.68	155.02	151.19	328.68	748.13	897.54	732.17
scaffold2_19.7	649186	650265	GTP 3',8-cyclase MoaA	1353	246.93	256.31	249.67	240.17	265.97	161.56	167.11	263.63	525.66	523.8	272.05
scaffold2_19.7	650469	650897	helix-turn-helix domain-containing protein	1354	53.94	56.92	59.26	46.77	55.93	72.93	81.56	105.24	522.15	557.81	193.61
scaffold2_19.7	650894	651673	molybdate ABC transporter substrate-binding protein	1355	88.67	113.49	103.48	86.11	113.12	53.41	65.88	183.84	287.08	268.78	137.98
scaffold2_19.7	651833	653611	ATP-binding cassette domain-containing protein	1356	72.75	93.82	75.13	60.8	68.29	82.32	82.5	200.97	233.88	234.38	106.78
scaffold2_19.7	653545	654264	MarR family transcriptional regulator	1357	600.14	667.68	613.54	392.23	415.52	1102.91	1004.88	662.84	460.68	427.25	156.18
scaffold2_19.7	654266	654979	respiratory nitrate reductase subunit gamma	1358	545.35	692.81	595.52	405.7	419.68	1514.93	1356.99	305.14	555.11	531.25	228.47
scaffold2_19.7	654976	655566	nitrate reductase molybdenum cofactor assembly chaperone	1359	353.07	423.21	369.03	269.6	270.99	700.2	633.31	125.93	292.8	292.63	136.3
scaffold2_19.7	655649	657172	nitrate reductase subunit beta	1360	602.6	581.12	618.58	489.71	543.85	873.67	893.48	149.93	353.07	342.3	124.22
scaffold2_19.7	657172	660909	nitrate reductase subunit alpha	1361	601.55	719.25	634.69	561.52	602.95	749.6	757.75	120.55	359.25	356.73	119.82
scaffold2_19.7	660968	662284	NarK/NasA family nitrate transporter	1362	1190.62	1523.92	1200.03	1186.17	1313.02	2111.73	2111.67	90.85	751.86	849.67	98.6
scaffold2_19.7	662507	663145	NTP transferase domain-containing protein	1363	65.64	70.29	65.1	77.89	97.37	103.61	109.94	185.91	456.67	451.58	176.68
scaffold2_19.7	663443	663943	MogA/MoaB family molybdenum cofactor biosynthesis protein	1364	272.6	381.24	288.88	421.87	516.62	458.02	391.68	482.95	387.72	528.18	496.21
scaffold2_19.7	664082	664387	molybdopterin-guanine dinucleotide biosynthesis protein	1365	409.68	619.2	381.04	432.63	545.48	634.68	604.01	510.71	697.03	684.61	425.37
scaffold2_19.7	664451	665461	dimethyl sulfoxide reductase anchor subunit	1366	294.56	420.19	290.69	192.17	232.98	543.66	513.59	415.8	387.86	398	328.52
scaffold2_19.7	665461	666102	dimethylsulfoxide reductase subunit B	1367	107.78	107.24	105.09	30.79	29.48	74.64	66.87	83.82	204.18	195.48	36.64
scaffold2_19.7	666269	667129	molybdopterin dinucleotide-binding protein	1368	103.65	105.21	102.16	55.31	62.8	93.19	93.06	52.11	152.07	164.38	22.77
scaffold2_19.7	667313	668849	molybdopterin-dependent oxidoreductase	1369	193.51	217.24	191.07	163.26	186.3	196.89	218.57	116.49	233.71	295.56	57.09
scaffold2_19.7	669286	670113	HesA/MoeB/ThiF family protein	1370	162.52	242.07	175.83	212.46	231.56	98.78	103.79	187.32	543.64	629.82	80.1
scaffold2_19.7	670128	671006	thiazole synthase	1371	236.24	260.94	245.27	247.57	302.65	136.72	130.25	224.34	717.37	776.33	74.01
scaffold2_19.7	671003	671272	sulfur carrier protein ThiS	1372	246.07	279.8	243.95	280.64	427.98	95.07	112.51	157.25	751.74	898.33	58.27
scaffold2_19.7	671278	672558	glycine oxidase ThiO	1373	382.21	346.78	364.02	391.04	415.74	251.73	234.3	238.11	735.8	766.8	63.08
scaffold2_19.7	672818	673837	magnesium and cobalt transport protein CorA	1374	177.73	174.63	186.6	147.42	168	104.25	95.7	85.25	173.41	139.87	32.72
scaffold2_19.7	673980	675425	nitrate reductase	1375	139.83	141.43	138.48	143.62	143.74	236.33	213.51	210.56	411.27	422.78	269.45
scaffold2_19.7	675509	677038	phospholipid carrier-dependent glycosyltransferase	1376	556.86	634.15	590.67	462.95	471.33	516.66	513.33	451.81	607	585.97	850.44
scaffold2_19.7	677153	678013	16S rRNA (cytidine(1402)-2'-O)-methyltransferase	1377	223.71	300.99	235.52	249.07	309.26	167.31	186.05	255.25	329.46	324.17	313.5
scaffold2_19.7	678010	678918	TatD family hydrolase	1378	121.8	158.17	128.24	127.72	137.25	255.87	259.18	183.15	283.45	228.22	210.39
scaffold2_19.7	678915	679811	16S rRNA (adenine(1518)-N(6)/adenine(1519)-N(6))- dimethyltransferase RsmA	1379	114.24	155.99	120.89	129.41	144.94	114.15	107.71	261.65	410.09	412.66	332.85
scaffold2_19.7	679835	680806	4-(cytidine 5'-diphospho)-2-C-methyl-D-erythritol kinase	1380	232.69	335.24	253.81	256.88	279.99	203.13	192.96	431.62	503.56	464.67	457.05
scaffold2_19.7	680803	681342	MarR family transcriptional regulator	1381	224.59	295.83	240.33	236.85	228.15	178.54	186.81	382.03	576.92	518.26	353.26
scaffold2_19.7	681324	681956	TetR/AcrR family transcriptional regulator	1382	276.79	336.79	268.63	282.06	288.85	203.35	196.77	250.24	605.61	534.62	167.84
scaffold2_19.7	682257	683555	bifunctional UDP-N-acetylglucosamine diphosphorylase/glucosamine-1-phosphate N-acetyltransferase GlmU	1384	551.96	672.09	559.6	658.11	783.27	556.38	570.42	935.89	561.59	656.18	1102.16
scaffold2_19.7	683552	684520	ribose-phosphate diphosphokinase	1385	455.81	564.61	483.29	438.09	505.12	302.25	289.62	267.07	587.23	547.48	342.84
scaffold2_19.7	684668	685945	hypothetical protein	1386	3930.87	3476.52	3685.55	3352.74	3659.22	1587.9	1853.9	330.07	811.49	756.57	369.37
scaffold2_19.7	685981	686550	hypothetical protein	1387	3587.16	2619.42	3435.65	2809.19	2889.25	347.98	411.98	216.83	645.22	485.53	123.35
scaffold2_19.7	686552	687166	hypothetical protein	1388	2595	1933.87	2434.78	2272.68	2141.22	215.31	245.59	362.25	779.58	610.96	303.11
scaffold2_19.7	687345	687947	50S ribosomal protein L25/general stress protein Ctc	1389	1791.77	1465.18	1576.63	2737.3	2355.06	2232.94	2164.76	1530.29	786.7	866.99	1129.4
scaffold2_19.7	687944	688546	aminoacyl-tRNA hydrolase	1390	622.43	620.37	567.3	1126.68	1045.57	495.67	540.63	787.93	400.46	456.77	168.57
scaffold2_19.7	688550	689689	PrsW family intramembrane metalloprotease	1391	101.33	115.93	111.91	113.07	98.76	163.12	133.9	421.56	117.23	82.86	27.19
scaffold2_19.7	689753	693379	transcription-repair coupling factor	1392	123.82	185.1	145	167.74	165.43	189.92	181.61	332.81	558.17	475.78	333.86
scaffold2_19.7	693441	693956	hypothetical protein	1393	951.29	1113.22	972.27	1003.9	1024.92	2057.61	1859.9	1714.53	916.49	1011.88	2525.17
scaffold2_19.7	693965	694603	MazG family protein	1394	448.11	583.26	495.9	481.59	459.26	315.19	296.77	896.1	736.56	875.95	1217.39
scaffold2_19.7	694719	695249	hypothetical protein	1395	204.9	252.09	214.23	181.48	158.5	191.5	190.18	435.36	371.54	407.87	274.62
scaffold2_19.7	695337	696617	phosphopyruvate hydratase	1396	2380.05	1741.08	2325.95	2204.14	1934.11	2466.04	2619.6	1966.94	1014.92	1326.51	2285.88
scaffold2_19.7	696917	697357	septum formation initiator family protein	1397	245.15	270.8	277.15	254.88	244.13	466.17	502.28	482.08	672.23	695.56	335.32
scaffold2_19.7	697365	697907	DUF501 domain-containing protein	1398	203.79	236.17	215.92	212.9	201.35	203.59	194.22	424.91	541.37	486.06	391.46
scaffold2_19.7	697904	698836	Ppx/GppA family phosphatase	1399	148.23	194.76	153.66	153.57	174.93	148.64	143.37	524.54	586.82	553.33	378.16
scaffold2_19.7	699066	699899	Bax inhibitor-1/YccA family protein	1401	1542.18	1521.52	1623.2	1890.31	2000.43	7273.25	8071.49	5753.27	1016.62	1288.56	5889.2
scaffold2_19.7	699970	700599	NUDIX hydrolase	1402	866.85	856.13	825.14	744.89	728.23	511.44	558.17	464.37	577.32	550.13	242.86
scaffold2_19.7	700742	701581	hypothetical protein	1403	42.57	36.96	50.18	28.56	33.18	181.19	133.18	130.65	254.33	173.59	58.55
scaffold3_18.2	220	477	hypothetical protein	1404	82.77	105.89	83.26	65.68	79.37	83.88	80.06	76.68	362.33	350.45	18.97
scaffold3_18.2	626	1516	MurR/RpiR family transcriptional regulator	1405	120.29	90.44	114.33	113.04	98.6	224.26	186.38	86.03	373.4	258.8	40
scaffold3_18.2	1567	1698	C4-dicarboxylate ABC transporter	1406	19.8	9.01	24.63	23.52	21.86	39.29	42.19	59.75	327.24	433.17	95.8
scaffold3_18.2	1874	3787	hypothetical protein	1407	47.24	45.85	43.01	39.82	39.96	77.98	71.92	88.1	213.99	177.21	47.39
scaffold3_18.2	3839	5236	DNA polymerase IV	1408	150.24	208.93	153.94	166.09	168.57	154.66	148.62	388.53	462.75	516.47	628.5
scaffold3_18.2	5233	5703	dihydrofolate reductase	1409	234.4	331.53	248.02	240.3	236.03	243.72	225.09	954.51	700.75	722.06	1623.12
scaffold3_18.2	5747	6556	thymidylate synthase	1410	536.27	726.54	537.39	563.65	701.36	421.88	390.46	978.87	821.34	875.02	2246.45
scaffold3_18.2	6557	7171	RdgB/HAM1 family non-canonical purine NTP pyrophosphatase	1411	515.93	717.69	532.69	608.5	746.26	436.33	441.78	1082.42	850.54	902.44	5551.21
scaffold3_18.2	7168	7932	ribonuclease PH	1412	948.63	1235.87	955.09	1136.58	1289.54	594.81	543.08	1211.41	883.06	983.53	1823.04
scaffold3_18.2	7966	8820	glutamate racemase	1413	132.71	197.45	162.34	174.84	231.83	243.24	173.41	317.96	548.01	376.07	169.34
scaffold3_18.2	9004	9321	ferrous iron transport protein A	1414	71.17	42.77	62.82	57.01	68.27	110.81	52.75	181.91	235.81	97.17	138.64
scaffold3_18.2	9460	11346	ferrous iron transporter B	1415	67.81	56.31	65.59	70.02	63.26	185.76	111.18	141.68	244.42	142.87	247.71
scaffold3_18.2	11346	11888	NifU family protein	1416	224.25	225.9	220.56	334.5	292.54	642.26	542.6	371.35	685.02	739.32	473.76
scaffold3_18.2	11892	12451	DUF2017 family protein	1417	213.97	311.34	231.69	200.45	227.69	368.81	315.61	488.39	672.91	699.56	649.53
scaffold3_18.2	12448	12735	ATP-dependent Clp protease adapter ClpS	1418	269.38	348.6	249.05	282.13	514.12	562.88	536.6	531.78	627.42	557.19	677.54
scaffold3_18.2	12822	14162	nicotinate phosphoribosyltransferase	1419	360.98	309.21	385.3	270.94	279.44	98.25	112.11	117.42	379.48	365.82	60.16
scaffold3_18.2	14355	14630	HU family DNA-binding protein	1420	2774.83	2007.89	2643.57	2554.9	3331.73	3105.48	3143.96	289.11	1040.21	1227.91	145.83
scaffold3_18.2	14735	16843	4-alpha-glucanotransferase	1421	112.7	134.67	120.61	122.03	127.01	149.27	158.68	363.58	448.48	415.14	451.51
scaffold3_18.2	16934	17755	RDD family protein	1422	541.87	739.55	548.54	612.7	588.81	1406.41	1606.63	1039.82	750.29	670.32	2318.85
scaffold3_18.2	17784	17969	hypothetical protein	1423	102.77	116.9	107.06	118.79	126.88	141.77	149.97	279.94	363.02	351.87	378.66
scaffold3_18.2	18117	18359	DUF3039 domain-containing protein	1424	766.93	844	730.66	680.24	805.12	492.67	525.21	522.18	1025.68	920.65	483.2
scaffold3_18.2	18384	18815	type II 3-dehydroquinate dehydratase	1425	653.37	821.81	599.75	579.28	646.54	567.76	611.7	694.51	1124.44	1123.79	547.93
scaffold3_18.2	18812	19843	cation diffusion facilitator family transporter	1426	282.05	401.25	289.24	262.3	292.84	246.78	240.87	379.84	670.45	602.02	313.36
scaffold3_18.2	19840	20859	phosphoheptose isomerase	1427	412.56	540.31	443.62	434.31	464.18	189.59	186.29	362.87	608.32	604.62	290.18
scaffold3_18.2	20856	21134	hypothetical protein	1428	837.11	1023.28	913.41	1038.19	1194.89	564.1	569.5	820.48	735.47	747.24	804.95
scaffold3_18.2	21144	21551	DUF3499 domain-containing protein	1429	517.18	556.54	510.85	578.48	591.7	269.98	281.96	239.42	530.38	491.89	343.15
scaffold3_18.2	21651	22070	metallopeptidase family protein	1430	105.63	125.45	123.03	115.47	121.01	154.29	158.11	185.19	434.31	501.16	258.33
scaffold3_18.2	22076	23578	hypothetical protein	1431	179.67	236.03	184.9	191.1	198.05	203.02	204.28	359.43	554.48	552.3	738.06
scaffold3_18.2	23575	26904	glycosyltransferase family 2 protein	1432	257.5	369.65	278.44	261.08	276.98	220.95	226.28	366.06	541.84	587.13	501.08
scaffold3_18.2	27053	27310	WhiB family transcriptional regulator	1433	1089.89	1420.44	1072.07	1550.29	2419	1456.77	1375.42	1912.87	959.24	1121.16	1159.81
scaffold3_18.2	27487	28182	hypothetical protein	1434	457.79	489.94	458.11	456.06	442.94	382.96	408.35	392.29	626.42	581.51	396.39
scaffold3_18.2	28179	29255	mannose-1-phosphate guanylyltransferase	1435	749.52	785.08	742.86	692.42	665.31	665.86	648.56	501.01	578.41	516.51	414.58
scaffold3_18.2	29332	30054	TIGR03089 family protein	1436	234.25	266.72	242.83	248.3	251.76	180.34	195.09	156.3	400.49	455.93	111.48
scaffold3_18.2	30057	31079	glycosyltransferase family 2 protein	1437	714.69	770.81	705.62	787.84	782.71	756.82	747.51	560.51	733.83	807.64	1014.33
scaffold3_18.2	31183	31515	hypothetical protein	1438	1276.66	1469.3	1207.74	1211.25	1555.81	239.13	307.79	192.91	613.9	581.13	126.5
scaffold3_18.2	31548	32468	LCP family protein	1439	687.7	800.38	678.09	647.52	848.87	520.33	521.68	197.14	661.13	626.9	227.94
scaffold3_18.2	32688	35645	DUF4981 domain-containing protein	1440	102.55	122.96	109.72	107.61	116.46	145.66	141.38	177.48	253.71	260.49	83.5
scaffold3_18.2	35706	36296	5-(carboxyamino)imidazole ribonucleotide mutase	1441	245.04	261.79	261.17	255.91	238.36	277.12	270.6	519.44	601.41	531.4	356.84
scaffold3_18.2	36289	37461	5-(carboxyamino)imidazole ribonucleotide synthase	1442	312.6	326.43	313.52	304.61	306.72	344.36	345.45	459.78	670.86	623.3	356.75
scaffold3_18.2	37568	38098	PH domain-containing protein	1443	261.8	294.62	244.8	268.29	299.29	359.92	306.3	244.94	475.26	435.03	278.18
scaffold3_18.2	38085	38801	peptidase E	1444	325.11	385.52	317.8	350.39	437.88	194.71	211.97	269.14	498.37	503.44	358.61
scaffold3_18.2	38849	39688	biotin--[acetyl-CoA-carboxylase] ligase	1445	342.4	343.4	318.8	383.96	395.88	182.59	177.55	369.69	437.91	447.6	264.83
scaffold3_18.2	39766	40191	hypothetical protein	1446	987.7	1109.56	1011.65	763.48	686.37	133.24	150.07	94.32	317.2	311.25	43.57
scaffold3_18.2	40284	41858	acyl-CoA carboxylase subunit beta	1447	650.85	681.73	649.78	642.06	624.96	510.7	476.57	235.58	371.2	425.44	261.46
scaffold3_18.2	41870	42085	acyl-CoA carboxylase subunit epsilon	1448	306.79	471.12	350.15	380.63	446.77	551.34	483.88	189.86	325.63	328.79	180.97
scaffold3_18.2	42087	42728	septum formation inhibitor Maf	1449	169.31	260.83	178.98	213.79	248.84	254.06	264.88	186.77	234.72	211.77	149.77
scaffold3_18.2	43303	43722	hypothetical protein	1450	54.39	88.76	64.61	56.38	64.61	53.75	58.32	111.44	327.98	316.2	105.03
scaffold3_18.2	43919	44653	SDR family oxidoreductase	1451	243.49	238.26	226.73	173.59	170.07	111.26	110.97	232.5	399.59	474.66	296.34
scaffold3_18.2	44757	45560	hydroxymethylpyrimidine/phosphomethylpyrimidine kinase	1452	1287.06	1418.95	1207.03	1230.52	1247.19	1146.12	1135.65	841.49	758.7	726.57	1380.57
scaffold3_18.2	45680	46990	SLC13 family permease	1453	133.94	189.91	130.54	138.76	185.82	78.02	68.06	110.93	206.03	205.82	16.39
scaffold3_18.2	47218	47316	short chain dehydrogenase	1454	18.94	22.29	19.03	24.92	21.66	15.38	23.98	77.77	42	55.1	33.47
scaffold3_18.2	47722	49069	thioester domain-containing protein	1455	35.35	40.36	38.13	50.2	51.31	146.9	166.09	64.58	485.67	335.75	56.37
scaffold3_18.2	49270	50268	magnesium transporter CorA family protein	1456	330.53	343.68	357.94	315.28	326.95	120.11	105.11	162.46	573.14	497.21	149.26
scaffold3_18.2	50265	50777	NUDIX domain-containing protein	1457	559.05	594.27	566.33	586.06	685.5	402.87	387.34	369.85	521.76	550.28	280.25
scaffold3_18.2	50739	50996	hypothetical protein	1458	35.94	52.48	47.94	38.26	35.61	50.96	48.16	95.17	180	249.94	14.64
scaffold3_18.2	51032	52801	ATP-grasp domain-containing protein	1459	330.31	295.28	315.01	286.66	289.1	185.7	186.33	284.53	497.85	483.97	230.04
scaffold3_18.2	52858	53583	hypothetical protein	1460	554.69	650.21	573.31	565.84	653.22	845.96	801.23	953.69	826.69	926.46	689.11
scaffold3_18.2	53622	55001	NAD(P)H-quinone dehydrogenase	1461	137.89	143.92	143.52	153.92	169.89	150.68	155.71	268.27	425.33	386.11	201.64
scaffold3_18.2	55189	56001	purine-nucleoside phosphorylase	1462	862.97	887.15	881.33	870.42	997.26	327.18	419.52	188.69	527.52	480.01	148.24
scaffold3_18.2	56028	57704	phospho-sugar mutase	1463	953.56	898.43	967.08	914.55	967.85	378.03	414.24	289.28	608.97	580.12	178.59
scaffold3_18.2	57736	59535	acyl--CoA ligase	1464	995.52	1010.99	950.4	971.4	1026.95	105.9	101.51	265.73	404.46	343.46	172.23
scaffold3_18.2	59596	60249	uridine kinase	1465	109.65	125.47	119.55	146.98	144.78	123.58	111.33	155.95	421.39	261.77	148.86
scaffold3_18.2	60331	61983	MFS transporter	1466	43.98	48.46	46.15	51.12	46.28	87.91	95.06	152.87	228.13	168.89	70.51
scaffold3_18.2	62271	62903	3'-5' exonuclease	1467	241.87	229.93	232.31	226.52	251.35	150.39	142.79	326.58	535.2	573.09	189.2
scaffold3_18.2	62905	64710	methionine--tRNA ligase	1468	359.04	443.83	377.33	347.29	383.88	620.28	604.79	577.28	595.22	492.64	375.09
scaffold3_18.2	64793	65695	ribonuclease HI	1469	114.22	150.57	128.75	126.58	138.71	106.8	108.71	370.83	574.85	547.32	319.71
scaffold3_18.2	65692	66105	cytidine deaminase	1470	126.97	173.09	124.48	147.01	146.21	134.94	121.82	316.31	579.5	568.67	348.48
scaffold3_18.2	66107	67465	ABC transporter permease	1471	136.03	173.67	145.94	149.59	139.42	189.38	173.96	282.85	573.31	485.97	356.69
scaffold3_18.2	67462	68733	ABC transporter permease	1472	191.98	242.84	207.19	191.69	186.87	234.07	206.38	286.58	601.13	490.62	367.7
scaffold3_18.2	68730	70319	ABC transporter ATP-binding protein	1473	163.04	225.07	182.18	184.95	214.05	248.31	242.11	281.11	618.41	452.06	410.8
scaffold3_18.2	70455	71573	BMP family ABC transporter substrate-binding protein	1474	365.4	266.29	346.3	322.18	290.91	338.29	322.13	189.46	614.64	543.74	96.5
scaffold3_18.2	71781	73022	aminoglycoside phosphotransferase family protein	1475	128.35	183.02	129.42	144.14	142.59	285.03	270.9	244.86	346.56	288.09	185.82
scaffold3_18.2	73019	74425	HlyC/CorC family transporter	1476	238.56	343.85	247.2	213.17	255.43	417.57	379.06	446.43	462.41	356.63	277.62
scaffold3_18.2	74553	75701	hypothetical protein	1477	162.93	235.85	171.21	201.68	192.35	266.33	262.19	439.16	377.48	412.2	247.03
scaffold3_18.2	75698	77902	NADP-dependent isocitrate dehydrogenase	1478	312.07	409.49	330.17	360.12	407.59	369.02	372.28	329.01	438.49	401.54	202.86
scaffold3_18.2	78098	78949	formyltetrahydrofolate deformylase	1479	224.23	242.91	219.95	201.46	222.71	102.12	100.75	143.59	506.94	479.89	285.26
scaffold3_18.2	79130	80113	malate dehydrogenase	1480	2134.45	1404.54	2028.83	1856.46	1664.79	940.14	1067.71	164.88	575.21	554.56	201.2
scaffold3_18.2	80541	81884	aldehyde dehydrogenase EutE	1481	457.69	300.2	448.08	401.68	322.64	103.89	116.24	153.1	157.75	177.73	91.44
scaffold3_18.2	81986	82324	DUF3017 domain-containing protein	1482	771.13	592.35	762.02	798.22	754.96	283.74	296	608.16	581.6	639.84	561.73
scaffold3_18.2	82321	83184	bifunctional methylenetetrahydrofolate dehydrogenase/methenyltetrahydrofolate cyclohydrolase	1483	1258.11	959.14	1204.27	1242.94	1274.93	538.41	509.78	1067.29	835.29	844.69	922.4
scaffold3_18.2	83199	84164	hypothetical protein	1484	51.75	49.33	45.66	47.91	44.15	32.27	25.19	110.74	220.24	226.32	96.32
scaffold3_18.2	84216	84395	hypothetical protein	1485	57.8	40.6	51.76	42.56	46.05	46.11	48.87	98.26	133.72	124.14	80.59
scaffold3_18.2	84394	86817	phosphoesterase	1486	133.14	104.62	132.49	151.49	135.19	51.03	50.77	107.3	141.3	163.48	78.21
scaffold3_18.2	87135	87455	hypothetical protein	1487	171.74	173.35	167.6	260.36	210.33	209.42	194.66	194.65	416.19	332.19	139.78
scaffold3_18.2	87531	89081	bifunctional phosphoribosylaminoimidazolecarboxamide formyltransferase/IMP cyclohydrolase	1488	715.48	909.91	767.97	745.06	768.24	445.52	445.57	606.9	617.52	624.62	574.86
scaffold3_18.2	89078	89701	phosphoribosylglycinamide formyltransferase	1489	1054.26	1396.88	1120.84	1122.92	1194.19	1065.97	1118.89	431.91	452.42	360.61	141.07
scaffold3_18.2	89726	90226	6,7-dimethyl-8-ribityllumazine synthase	1490	73.07	50.35	65.36	56.76	49.9	56	57.46	190.19	374.26	357.39	111.16
scaffold3_18.2	90229	91539	3,4-dihydroxy-2-butanone-4-phosphate synthase	1491	175.23	184.08	170.53	202.74	202.74	339.28	356.75	365.84	461.57	506.49	310.79
scaffold3_18.2	91533	92147	riboflavin synthase	1492	39.81	38.75	33.93	47.83	44.41	64.98	59.09	215.78	237.88	186.47	28.76
scaffold3_18.2	92140	93135	bifunctional diaminohydroxyphosphoribosylaminopyrimidine deaminase/5-amino-6-(5-phosphoribosylamino)uracil reductase RibD	1493	95.88	121.6	103.82	132.94	111.29	201.86	193.27	330.78	262.66	310.16	211.47
scaffold3_18.2	93427	94917	hypothetical protein	1494	219.42	263.23	237.4	209.04	202.54	456.69	460.25	477.39	497.87	590.46	698.2
scaffold3_18.2	95066	95959	succinate--CoA ligase subunit alpha	1495	3587.65	2334.48	3286.34	2860.35	2491.26	1768.56	1870.13	1713.49	818.91	941.18	3323.63
scaffold3_18.2	95963	97138	ADP-forming succinate--CoA ligase subunit beta	1496	3191.1	2541.72	3011.16	2482.4	2371.06	2081.5	2061.59	2279.66	923.77	1183.77	4655.35
scaffold3_18.2	97118	97408	hypothetical protein	1497	605.77	652.3	599.45	682.05	958.62	657.45	780.07	1060.16	685.54	851.55	1518.74
scaffold3_18.2	97365	99797	DNA helicase PcrA	1498	176.21	251.91	191.03	145.49	156.63	144.67	125.73	294	351.27	346.85	257.06
scaffold3_18.2	99794	100105	hypothetical protein	1499	206.17	257.44	244.34	239.21	279.48	608.2	629.04	324.06	654.63	565.84	359.46
scaffold3_18.2	100234	101196	methionine ABC transporter substrate-binding protein	1500	129.32	173.12	158.7	191.81	201.71	214.6	230.4	93.34	536.89	218.12	92.24
scaffold3_18.2	101228	102325	methionine ABC transporter ATP-binding protein	1501	40.1	72.2	52.21	74.82	70.84	113.03	132.4	118.61	452.52	116.09	77.97
scaffold3_18.2	102325	102978	ABC transporter permease	1502	38.63	45.95	45.7	59.09	49.88	93.76	92.56	153.61	384.19	148.38	25.29
scaffold3_18.2	103087	104349	cardiolipin synthase	1503	92.69	92.59	100.86	85.78	80.38	69.05	76.94	103.79	231.08	193.18	13.96
scaffold3_18.2	104482	104760	GlsB/YeaQ/YmgE family stress response membrane protein	1504	1470.91	1655.4	1420.26	1333.22	1295.15	3695.16	4048.72	891.4	907.97	1024.62	124.64
scaffold3_18.2	104990	105274	PspC domain-containing protein	1505	1699.67	1551.34	1653.5	1052.06	1046.92	1179.42	1222.94	533.74	849.11	810.16	131.24
scaffold3_18.2	105526	107079	glutamine-hydrolyzing GMP synthase	1506	382.79	405.15	386.69	386.52	409.99	308.06	292.24	1285.62	691.82	567.82	1224.62
scaffold3_18.2	107092	107286	hypothetical protein	1507	13.92	10.99	9.16	12.47	8.6	33.26	37.9	37.5	74.79	48.89	10.46
scaffold3_18.2	107276	107848	serine O-acetyltransferase	1508	145.96	121.33	135.23	149.36	142.37	189.7	182.83	192.64	459.2	447.2	144.84
scaffold3_18.2	107857	108204	chorismate mutase	1509	247.17	284.5	268.45	320.62	275.51	519.44	569.75	420.81	796.17	858.07	460.45
scaffold3_18.2	108262	109365	GuaB3 family IMP dehydrogenase-related protein	1510	596.88	615.92	607.33	639.1	587.37	384.29	409.3	513.74	694.01	599.19	773.57
scaffold3_18.2	109399	110913	IMP dehydrogenase	1511	674.6	829.52	694.54	675.19	777.5	740.1	707.54	598.38	687.84	670.66	842.55
scaffold3_18.2	111011	112540	polyprenol phosphomannose-dependent alpha 1,6 mannosyltransferase MptB	1512	226.34	284.2	248.59	208.92	221.05	189.62	186.88	283.73	360.63	355.89	301.75
scaffold3_18.2	112589	112897	hypothetical protein	1513	63.2	87.6	84.85	67.75	87.13	190.66	179.3	207.55	414.58	441.75	58.98
scaffold3_18.2	112835	114571	alanine:cation symporter family protein	1514	115.36	151.94	131.23	124.02	117.97	137.16	142.3	247.02	535.77	559.8	73.97
scaffold3_18.2	114692	115261	hypothetical protein	1515	1233.76	781.76	1164.34	1058.8	829.18	274.86	249.35	111.33	1070.2	1181.48	86.42
scaffold3_18.2	115589	117184	chaperonin GroEL	1516	9781.17	6175.65	8849.96	11170.3	10564.8	4903.82	5447.14	6518.91	963.85	1106.96	7701.23
scaffold3_18.2	117197	117493	co-chaperone GroES	1517	8216.85	5101.67	7419.97	9697.97	9273.97	3710.89	4014.96	5471.1	972.79	1194.95	6299.6
scaffold3_18.2	117699	118703	hypothetical protein	1518	51.36	59.89	54.99	50.44	43.27	32.45	27.9	155.27	342.55	219.99	89.64
scaffold3_18.2	118823	119617	hypothetical protein	1519	133.54	194.8	134.64	103.17	104.62	239.91	211.25	270.56	394.35	293.74	162.38
scaffold3_18.2	119622	120821	SAM-dependent methyltransferase	1520	142.69	225.92	143.13	119.98	145.04	78.88	63.33	293.7	358.99	274.63	131.2
scaffold3_18.2	121072	121497	hypothetical protein	1521	798.13	870.42	843.28	705.11	714.8	720.71	683.74	384.23	725.94	765.52	378.34
scaffold3_18.2	121524	122276	ABC transporter ATP-binding protein	1522	93.26	135.93	111.77	85.82	86.87	84.96	58.71	163.97	278.97	211.8	275.58
scaffold3_18.2	122273	123352	iron ABC transporter permease	1523	30.61	46.95	33.4	33.41	33.18	35.58	26.81	83.03	184.44	155.7	248.76
scaffold3_18.2	123375	124544	ABC transporter substrate-binding protein	1524	27.26	31.68	29.15	26.11	27.07	93.35	66.71	82.7	232.19	110.65	260.7
scaffold3_18.2	124670	125161	8-oxo-dGTP diphosphatase	1525	122.58	149.53	116.57	134.63	176.6	111.13	118.8	228.5	501.07	367.36	236.96
scaffold3_18.2	125275	126318	tRNA (adenosine(37)-N6)-threonylcarbamoyltransferase complex transferase subunit TsaD	1526	252.14	388.23	284.07	286.03	279.31	257.82	240.65	463.67	660.8	526.44	525.77
scaffold3_18.2	126311	126778	ribosomal protein S18-alanine N-acetyltransferase	1527	430	549.79	461.46	487.18	586.22	177.52	187.94	383.6	663.48	523.03	172.42
scaffold3_18.2	126775	127431	tRNA (adenosine(37)-N6)-threonylcarbamoyltransferase complex dimerization subunit type 1 TsaB	1528	801.96	1048.21	856.89	1087.63	1278.73	411.3	409.8	549.91	762.23	714.21	747.64
scaffold3_18.2	127431	128324	tRNA (adenosine(37)-N6)-threonylcarbamoyltransferase complex ATPase subunit type 1 TsaE	1529	518.3	661.47	546.13	662.17	709.6	454.84	444.91	415.79	679.48	564.61	644.71
scaffold3_18.2	128536	129216	HNH endonuclease	1530	268.48	366.96	286.56	372.04	329.27	1108.6	1160.38	503.23	974.97	1001.16	680.12
scaffold3_18.2	129226	130701	DEAD/DEAH box helicase	1531	96.04	180.44	115.55	148.33	141.72	716.27	814.93	937.54	760.86	827.76	646.88
scaffold3_18.2	130677	131141	hypothetical protein	1532	178.75	383.45	231.57	235.62	252.49	1596.81	1635.72	1114.19	858.79	1048.55	732.75
scaffold3_18.2	131680	134019	ABC transporter permease	1533	10.3	15.76	11.57	19.94	18.49	136.34	103.67	156.08	191.03	140.7	25.47
scaffold3_18.2	134019	134714	ABC transporter ATP-binding protein	1534	13.3	19.71	21.06	24.82	22.38	133.02	108.99	184.45	344.03	299.42	51.79
scaffold3_18.2	135309	136448	glycosyltransferase family 1 protein	1535	718.06	916.48	749.91	709.82	807.14	497.27	467.09	345.89	565.12	552.88	399.32
scaffold3_18.2	136492	137937	NAD(P)H-hydrate epimerase	1536	652.89	677.27	627.64	730.3	736.09	483.15	492.95	572.27	725.67	754.45	766.52
scaffold3_18.2	138028	138375	holo-ACP synthase	1537	229.48	227.67	235.6	285.64	247.21	147.34	174.38	510.28	538.68	619.56	341.09
scaffold3_18.2	138497	140344	glutamine--fructose-6-phosphate transaminase (isomerizing)	1538	1032.92	770.44	1026.39	968.79	828.21	430.13	399.84	834.41	772.54	797.71	198.43
scaffold3_18.2	140524	141543	triacylglycerol lipase	1539	79.99	60.51	84.2	74.94	62.81	40.18	39.83	92.8	161.21	113.14	6.62
scaffold3_18.2	141875	142681	triacylglycerol lipase	1540	24.66	38.11	30.92	33.96	30.37	64.9	68.82	101.98	165.95	176.47	5.55
scaffold3_18.2	142810	143793	type I pantothenate kinase	1541	162.51	201.87	173.42	182.92	199.91	145.6	132.69	174.06	297.3	238.41	45.64
scaffold3_18.2	143838	144506	hypothetical protein	1542	330.43	474.48	362.34	512.15	554.43	204.36	186.89	295.71	404.64	480.53	297.35
scaffold3_18.2	144602	145954	phosphoglucosamine mutase	1543	1294.74	1339.69	1306.3	1656.19	1839.8	589.63	584.25	707.27	702.83	685.4	1239.53
scaffold3_18.2	146162	146637	30S ribosomal protein S9	1544	1435.58	1098.95	1364.2	1875.74	1747.44	639.69	734.43	667.24	746.32	834.67	760.12
scaffold3_18.2	146660	147103	50S ribosomal protein L13	1545	1080.78	837.43	1080.44	1040.81	1061.59	451.26	532.84	435.81	835.5	921.52	526.77
scaffold3_18.2	147367	150648	endo-beta-N-acetylglucosaminidase	1546	80.75	68.17	77.21	98.53	89.59	116.73	106.87	112.57	247.03	227.9	130.52
scaffold3_18.2	150766	151671	hypothetical protein	1547	199.16	302.69	216.7	256.4	223.08	769.4	849.46	511.06	389.89	617.84	176.02
scaffold3_18.2	151791	152084	DUF1540 domain-containing protein	1548	2312.21	3048.08	2654.28	3373.03	3245.47	11621.4	14261	3783.41	969.73	1396.38	136.1
scaffold3_18.2	152258	153202	tRNA (guanosine(46)-N7)-methyltransferase TrmB	1549	285.04	240.41	288.39	355.77	315.49	270.87	293.13	121.25	349.19	276.73	38.03
scaffold3_18.2	153199	154038	tRNA pseudouridine(38-40) synthase TruA	1550	162.13	185.01	174	201.19	225.21	86.49	83.63	167.31	318.08	256.21	96.33
scaffold3_18.2	154035	154655	methyltransferase	1551	97.21	110.26	93.56	106.63	117.43	96.53	96.79	139.31	482.15	409.23	143.69
scaffold3_18.2	154724	155982	energy-coupling factor transporter transmembrane protein EcfT	1552	687.92	776.09	687.79	676.14	698.07	436.44	413.36	288.68	369.95	411.37	285.95
scaffold3_18.2	155979	157634	ATP-binding cassette domain-containing protein	1553	120.05	125.32	126.42	229.8	225.32	158.14	179.02	181.53	295.02	239.91	152.09
scaffold3_18.2	157631	158443	ECF transporter S component	1554	119.7	127.64	113.93	222.35	235.88	234.41	241.26	202.36	376.17	326.31	199.16
scaffold3_18.2	158445	159206	3-oxoacyl-ACP reductase FabG	1555	242.18	201.12	233.4	264.52	276.08	520.75	518.12	338.5	487.23	589.59	301.93
scaffold3_18.2	159299	160912	ABC transporter permease	1556	175.78	223.55	189.19	137.22	125.56	104.03	119.85	520.96	384.77	370.26	278
scaffold3_18.2	160894	161637	ABC transporter ATP-binding protein	1557	454.18	557.24	474.93	463.23	409.24	275.14	287	532.73	501.28	532.68	252.95
scaffold3_18.2	162617	163234	superoxide dismutase	1558	1914.86	1409.96	1880.88	3344.75	3232.31	5345.08	5539.46	5599.76	873.28	888.46	4789.34
scaffold3_18.2	163466	165375	beta-galactosidase	1559	54.93	50.21	64.19	73.57	69.66	201.78	220.27	166.83	100.78	104.38	22.16
scaffold3_18.2	165351	166931	beta galactosidase jelly roll domain-containing protein	1560	24.05	28.16	24.29	29.81	32.33	38.92	37.71	123.33	153.05	199.68	0
scaffold3_18.2	166844	168286	beta-N-acetylhexosaminidase	1561	18.47	19.64	19.43	25.06	34.4	41.89	38.49	97.79	73.34	61.95	0
scaffold3_18.2	168302	168436	family 20 glycosylhydrolase	1562	25.39	19.23	22.56	31.3	24.42	27.22	35.45	69.74	46.48	7.93	0
scaffold3_18.2	168473	169871	discoidin domain-containing protein	1563	12.89	13.26	14.35	25.72	18.95	29.74	27.43	99.1	39.99	48.41	73.28
scaffold3_18.2	170207	171847	MFS transporter	1564	249.74	375.72	259.49	189.57	224.53	152.17	158.69	194.83	405.68	354.96	77.21
scaffold3_18.2	172227	173444	glycosyltransferase	1565	732.94	760.51	702.76	540.88	566.68	462.73	505.67	417.67	361.65	394.3	392.33
scaffold3_18.2	173554	174117	50S ribosomal protein L17	1566	3305.32	2434.12	3059.95	3623.93	3949.42	3144.71	3880.84	1465.6	982.96	1136.32	1221.5
scaffold3_18.2	174423	175439	DNA-directed RNA polymerase subunit alpha	1567	1354.09	970.08	1377.51	1371.07	1191.67	993.69	1096.43	415.88	891.11	952.15	499.36
scaffold3_18.2	175682	176287	30S ribosomal protein S4	1568	1965.67	1441.38	1957.05	2230.53	1883.34	995.98	1113.4	493.19	978.88	1147.55	884.41
scaffold3_18.2	176318	176725	30S ribosomal protein S11	1569	1391	1124.85	1448.51	1780.19	1517.61	597.99	757.91	295.92	928.87	1043.08	355.68
scaffold3_18.2	176797	177168	30S ribosomal protein S13	1570	2347.85	1891.09	2238.51	2538.73	2405.17	1170.61	1276.94	497.45	985.59	1134.47	582.19
scaffold3_18.2	177547	177660	50S ribosomal protein L36	1571	3151	2658.58	2904.88	3168.97	2997.09	1955.18	2291.21	1466.56	1044.58	1343.29	1963.9
scaffold3_18.2	177739	177960	translation initiation factor IF-1	1572	4057.04	3683.73	3809.61	4202.38	4178.74	3283.09	3483.11	2776.39	1175.15	1492.24	3531.25
scaffold3_18.2	178175	179014	type I methionyl aminopeptidase	1573	507.91	589.72	547.27	573.87	595.69	465.31	473.89	826.72	768.07	919.06	988.9
scaffold3_18.2	179016	179585	adenylate kinase	1574	637.55	743.7	683.29	498.87	509.1	352.52	358.96	427.56	869.83	922.34	402.73
scaffold3_18.2	179582	180901	preprotein translocase subunit SecY	1575	615.86	709.44	697.47	514.57	477.3	973.09	888.31	500.11	937.7	959.68	393.3
scaffold3_18.2	181072	181710	hypothetical protein	1576	286.95	353.19	284.28	296.78	357.26	372.39	361.83	611.96	528.8	560.78	825.01
scaffold3_18.2	181700	183057	MFS transporter	1577	23.57	32.22	22.92	18.63	20.67	57.24	53.06	140.11	187.6	206.43	216.14
scaffold3_18.2	183137	183883	glycerophosphoryl diester phosphodiesterase	1578	44.02	73.63	47.9	47.27	48.21	164.31	139.52	223.46	491.57	539.95	363.26
scaffold3_18.2	184005	185711	ABC transporter family substrate-binding protein	1579	86.22	95.92	88.05	77.33	73.81	82.08	64.76	168.77	188.45	187.7	79.35
scaffold3_18.2	185912	187624	ABC transporter family substrate-binding protein	1580	44.94	41.02	52.03	32	28.77	205.21	195.22	348.79	25.61	24	0.93
scaffold3_18.2	187872	190004	ABC transporter ATP-binding protein	1581	21.2	30.37	21.78	23.63	25.05	120.63	115.94	265.79	0	0	0
scaffold3_18.2	190001	191008	ABC transporter permease	1582	332.27	518.94	334.46	286.71	430.47	129.17	130.77	311.95	0	0	0
scaffold3_18.2	191021	192004	ABC transporter permease	1583	56.28	82.58	55.65	56.88	74.85	201.98	172.54	175.2	16.7	15.64	3.14
scaffold3_18.2	192309	192749	50S ribosomal protein L15	1584	1892.11	1885.75	1920.49	2758.89	2511.33	3582.9	4253.28	2464.54	1062.37	1358.83	2866.76
scaffold3_18.2	192751	192933	50S ribosomal protein L30	1585	1408.91	1259.34	1401.26	1989.06	1689.26	1476.42	1689.51	2517.22	1195.98	1577.45	2708.38
scaffold3_18.2	192933	193580	30S ribosomal protein S5	1586	1475.36	1338.2	1513.51	2297.79	1862.56	1119.57	1214.19	3019.11	1011.3	1282.6	3276.96
scaffold3_18.2	193605	193988	50S ribosomal protein L18	1587	1341.36	1100.1	1351.05	1801.46	1488.73	1227.55	1292.54	3077.28	1000.11	1264.69	3190.71
scaffold3_18.2	193990	194532	50S ribosomal protein L6	1588	1608.37	1372.09	1558.82	2079.35	1768.25	1197.54	1348.6	2348.65	993.11	1262.84	2479.81
scaffold3_18.2	194561	194968	30S ribosomal protein S8	1589	1715.97	1437.56	1626.15	2266.11	1939.04	1737.85	2013.4	1564.78	1012.13	1210.97	1785.25
scaffold3_18.2	195127	195312	type Z 30S ribosomal protein S14	1590	1355.26	1196.27	1356.56	1883.95	1471.98	1277.3	1382.62	1981.86	955.57	1197.95	2141.05
scaffold3_18.2	195320	195952	50S ribosomal protein L5	1591	1559.79	1455.67	1591.14	1977.14	1801.34	1348.41	1354.08	1738.29	1020.34	1319.28	2170.27
scaffold3_18.2	195949	196317	50S ribosomal protein L24	1592	1747.27	1658.26	1774.01	2124.22	1887.2	1226.69	1171.05	1820.77	1005.66	1293.96	2369.21
scaffold3_18.2	196318	196686	50S ribosomal protein L14	1593	1497.31	1625	1600.99	1899.66	1703.06	879.78	834.47	1911.82	1056.96	1375.94	2344.71
scaffold3_18.2	197276	197548	30S ribosomal protein S17	1594	1460.4	1347.77	1525.28	2510.67	2264.17	1206.69	1355.53	2919.28	993.99	1307.22	3424.5
scaffold3_18.2	197551	197784	50S ribosomal protein L29	1595	2159.61	1917.16	2152.5	3861.75	3820.79	1740.52	2111.26	3522.67	1004.76	1268.68	4127.15
scaffold3_18.2	197784	198203	50S ribosomal protein L16	1596	1533.73	1432.79	1563.89	2781.33	2380.36	1366.02	1628.37	2551.2	994.64	1277.03	3247.24
scaffold3_18.2	198205	199014	30S ribosomal protein S3	1597	1740.6	1751.39	1824.95	2839.57	2429.2	2235.08	2445.32	2584.07	998.09	1282.9	3586.4
scaffold3_18.2	199016	199477	50S ribosomal protein L22	1598	2236.92	1912.62	2216.96	3069.8	2583.26	2250.68	2366.81	2137.77	924.08	1199.34	2884.02
scaffold3_18.2	199495	199776	30S ribosomal protein S19	1599	1163.11	1185.95	1209.85	1470.11	1282.94	1040.31	1132.4	1893.3	1000.11	1233.74	2687.07
scaffold3_18.2	199792	200628	50S ribosomal protein L2	1600	1457.97	1429.31	1502.21	1963.5	1685.64	1249.83	1438.97	1967.18	974.27	1216.2	3014.75
scaffold3_18.2	200655	200963	50S ribosomal protein L23	1601	1089.03	1093.48	1117.81	1259.63	1107.69	1077.81	1145.59	1449.44	1009.33	1215.91	2012.26
scaffold3_18.2	200960	201865	50S ribosomal protein L4	1602	1229.93	1191.27	1329.07	1606.12	1275.33	859.11	939.56	1450.27	972.78	1191.76	1872.27
scaffold3_18.2	201862	202533	50S ribosomal protein L3	1603	1933.83	1860.87	2006.17	2266.58	1926.56	1169.19	1328.69	1966.58	994.43	1272.01	2905.07
scaffold3_18.2	202545	202856	30S ribosomal protein S10	1604	2326.12	2483.71	2384.29	2631.35	2866.18	1470.85	1702.77	2663.43	1007.79	1351.51	3478.14
scaffold3_18.2	203432	205348	aminotransferase class I/II-fold pyridoxal phosphate-dependent enzyme	1605	20.36	22.62	21.79	38.82	37.77	47.33	46.8	120.05	95.47	125.15	52.57
scaffold3_18.2	205329	206588	hypothetical protein	1606	59.34	77.67	58.35	177.77	201.38	154.93	147.56	350.54	236.09	267.29	202.73
scaffold3_18.2	206683	207009	hypothetical protein	1607	184.98	261.15	187.13	255.39	281.56	318.23	287.02	691.02	500.84	564.42	383.14
scaffold3_18.2	207009	208502	glutamate--tRNA ligase	1608	386.1	585.76	394.88	401.36	522.8	308.35	303.41	592.16	517.35	514.35	640.84
scaffold3_18.2	208556	210253	glutamine--tRNA ligase/YqeY domain fusion protein	1609	385.84	335.24	379.59	339.2	351.28	245.51	269.26	106.62	355.13	307.1	89.39
scaffold3_18.2	210356	212302	5'-nucleotidase C-terminal domain-containing protein	1610	158.99	216.37	172.88	149.99	157.18	158.7	151.28	130.54	190.21	202.62	84.11
scaffold3_18.2	212380	214173	alpha/beta hydrolase	1611	238.5	309.24	237.7	208.04	246.83	156.64	148.19	153.38	243.51	201.96	65.92
scaffold3_18.2	214282	215475	elongation factor Tu	1612	4480.39	3805.14	4341.57	5217.03	5295.03	5798.42	5890.88	4493.18	995.31	1302.26	4793.31
scaffold3_18.2	215744	217606	hypothetical protein	1613	107.5	146.53	125.01	55.1	43.07	287.55	242.81	322.98	188.44	166.1	106.64
scaffold3_18.2	217642	218598	hypothetical protein	1614	246.2	315.7	285.56	263.6	231.37	395.56	414.46	374.67	120.35	130.82	57.92
scaffold3_18.2	219172	221274	elongation factor G	1615	526.87	589.73	585.58	678.04	576.04	972.42	972.56	752.62	913.71	1025.08	697.85
scaffold3_18.2	221407	221877	30S ribosomal protein S7	1616	1407.35	1498.34	1456.39	1625.86	1394.7	3181.79	3232.18	2405.19	1001.3	1237.94	2081.19
scaffold3_18.2	221881	222252	30S ribosomal protein S12	1617	877.27	1135.7	976.6	939.89	918.91	1045.97	1095.24	2026.08	1009.39	1238.93	1643.01
scaffold3_18.2	222569	222910	hypothetical protein	1618	945.79	754	854.67	1110.01	1011.52	1597.39	1674.58	816.07	723.29	824.17	1284.76
scaffold3_18.2	223251	224516	choice-of-anchor M domain-containing protein	1619	53.96	52.61	52.98	62.32	48.81	145.48	136.88	200.92	87.58	82.81	25.73
scaffold3_18.2	224563	224886	hypothetical protein	1620	33.23	44.35	38.5	44.41	44.06	289.49	224.15	69	26.03	34.42	29.34
scaffold3_18.2	225121	229002	DNA-directed RNA polymerase subunit beta'	1621	599.85	669.03	631.05	808.46	708.32	1001.68	1012.27	2082.75	916.33	1039.37	1963.33
scaffold3_18.2	229172	232651	DNA-directed RNA polymerase subunit beta	1622	806.05	1172.13	888.1	921.16	835.03	1050.01	999.7	1587.24	964.88	1107.56	1454.16
scaffold3_18.2	232951	233343	50S ribosomal protein L7/L12	1623	2889.61	2682.86	2917.25	3557.95	3372.84	4794.23	5311.27	5628.66	1031.16	1341.08	5836.61
scaffold3_18.2	233357	233971	50S ribosomal protein L10	1624	3997.19	3828.52	4141.82	4620.9	4134.33	3721.59	4690.54	6458.93	1011.95	1321.14	7278.82
scaffold3_18.2	234397	235095	50S ribosomal protein L1	1625	1713.17	1244.03	1632.63	2341.19	1822.45	1702.04	1846.76	2132.61	975.58	1255.37	2190.98
scaffold3_18.2	235185	235616	50S ribosomal protein L11	1626	1460.17	1126.46	1375.89	1799.4	1703.7	1223.48	1238.86	1683.67	959.61	1138.08	1529.56
scaffold3_18.2	235746	236657	transcription termination/antitermination protein NusG	1627	471.41	725.61	551.65	506.8	526.81	851.22	785.56	1193.26	915.87	1067.74	1641.26
scaffold3_18.2	236681	237331	preprotein translocase subunit SecE	1628	805.91	1201.48	942.93	1082.52	1150.61	1285.99	1216.07	1913.51	1010.63	1239.31	2302.37
scaffold3_18.2	237580	238914	aminotransferase class I/II-fold pyridoxal phosphate-dependent enzyme	1630	516.77	509.2	517.01	432.52	443.2	425.61	390.63	247.52	487.97	388.64	203.96
scaffold3_18.2	239018	240148	UDP-N-acetylmuramate dehydrogenase	1631	541.57	519.27	560.49	580.81	512.05	511.21	480.25	817.02	745.1	732.07	1033.82
scaffold3_18.2	240145	240561	MaoC family dehydratase	1632	495.39	454.91	498.1	518.92	653.21	604.48	658.35	1020.79	878.3	983.85	1200.93
scaffold3_18.2	240558	240986	MaoC family dehydratase N-terminal domain-containing protein	1633	553.2	646.84	601.18	565.03	698.31	1114.88	1106.21	1092.18	856.54	825.48	858.67
scaffold3_18.2	241132	241302	50S ribosomal protein L33	1634	364.29	317.63	414.82	353.23	527.73	2023.56	2058.08	1107.02	964.43	1268.8	1285.3
scaffold3_18.2	242026	242919	exodeoxyribonuclease III	1638	194.23	172.91	193.75	184.6	215.71	114.34	112.94	270.22	393.72	408.67	284.95
scaffold3_18.2	242921	243856	enoyl-CoA hydratase/isomerase family protein	1639	345.84	398.6	323.72	329.18	439.22	244.64	237.1	699.42	648.62	655.68	990.73
scaffold3_18.2	243960	245534	polyprenol phosphomannose-dependent alpha 1,6 mannosyltransferase MptB	1640	170.51	263.78	191.7	187.01	166.72	209.65	200.92	375.6	388.69	334.83	345.66
scaffold3_18.2	245531	245839	4Fe-4S binding protein	1641	215.72	395.97	253.11	230.67	231.27	203	216.69	350.01	501.25	455	357.76
scaffold3_18.2	245836	246420	NADH-quinone oxidoreductase subunit C	1642	278.55	458.24	311.07	277.94	310.71	203.76	192.62	470.65	471.4	438.1	547.92
scaffold3_18.2	246417	246815	proton-conducting membrane transporter	1643	423.13	552.51	426.08	451.01	489.55	412.75	368.74	610.18	398.12	465.02	933.09
scaffold3_18.2	246968	248932	2-oxoacid:acceptor oxidoreductase subunit alpha	1644	630.09	704.24	628.12	666.24	789.6	440.21	448.35	333.93	583.95	517.63	408.37
scaffold3_18.2	248934	250019	2-oxoacid:ferredoxin oxidoreductase subunit beta	1645	397.98	480.16	424.25	441.41	456.41	228.67	241.98	505.66	583.33	588.37	597.79
scaffold3_18.2	250143	250658	hypothetical protein	1646	38.91	57.67	44.16	40.07	43.97	72.39	73.09	177.07	31.21	26.31	19.89
scaffold3_18.2	250946	251073	toxin PIN	1647	24.34	31.88	30.65	40.78	54.93	131.78	109.88	60.75	60.47	82.05	26.46
scaffold3_18.2	251148	253130	peptidase M13	1648	242.56	280.24	237.25	192.09	199.53	221.45	205.49	111.28	283.19	301.55	150.72
scaffold3_18.2	253188	253370	ABC transporter permease	1649	256.06	310.72	308.26	213.99	136.38	154.05	161.26	212.35	280.77	207.9	171.71
scaffold3_18.2	253764	255344	hypothetical protein	1650	604.78	614.02	630.38	302.83	243.89	0.13	0	131.78	0	0	0
scaffold3_18.2	255367	255846	hypothetical protein	1651	683.45	808.94	757.64	468.95	605.57	0	0	269.26	0	0	0
scaffold3_18.2	256613	257839	ABC transporter permease	1652	388.06	519.31	420.38	293.46	261.54	198.49	199.3	365.92	423.07	397.79	89.6
scaffold3_18.2	257836	258456	ATP-binding cassette domain-containing protein	1653	545.83	664.27	572.07	434.69	369.36	239.47	218.72	343.15	669.95	622.89	94.25
scaffold3_18.2	258458	259390	hypothetical protein	1654	745.5	958.55	780.53	489.4	507.15	278.6	281.11	341.55	657.09	602.18	78.76
scaffold3_18.2	259331	259477	hydroxymethylbilane synthase	1655	84.83	83.7	82.94	60.62	65.47	202.06	190.07	147.85	0	0	0
scaffold3_18.2	259553	260501	hypothetical protein	1656	192.39	189.88	207.97	117.85	137.96	189.97	187.97	228.39	58.24	58.51	8.08
scaffold3_18.2	260498	260803	hypothetical protein	1657	273.96	319.06	276.84	174.15	174.03	122.15	113.05	232.49	45.97	39.37	9.29
scaffold3_18.2	260957	261790	CoA ester lyase	1658	470.64	616.86	480.04	346.42	387.7	233.48	232.18	480.48	291.51	296.03	172.54
scaffold3_18.2	261906	262676	precorrin-6A synthase (deacetylating)	1659	295.45	318.13	315.74	311.36	276.5	168.16	167.78	848.08	575.11	616.22	988.17
scaffold3_18.2	262707	263681	polyprenyl synthetase family protein	1660	523.44	675.67	563.55	618.84	607.78	498.44	493.07	1341.75	712.91	833.35	1684.06
scaffold3_18.2	263873	265489	NADH-quinone oxidoreductase subunit NuoN	1661	620.48	690.14	670.01	788.11	669.93	897.95	868.71	1534.81	924.39	1112.91	1827.88
scaffold3_18.2	265486	266979	NADH-quinone oxidoreductase subunit M	1662	677.15	840.97	757.36	798.93	687.79	1039.62	1027.72	1080.87	921.08	1071.37	1543.03
scaffold3_18.2	266997	268883	NADH-quinone oxidoreductase subunit L	1663	600.94	765.24	664.04	717.42	640.32	886.37	838.26	1100.74	756.66	885.83	1280.42
scaffold3_18.2	268894	269193	NADH-quinone oxidoreductase subunit NuoK	1664	570.27	681.81	606.02	646.77	569.89	968.4	911.75	941.35	920.48	1002.74	1289.99
scaffold3_18.2	269190	270044	NADH-quinone oxidoreductase subunit J	1665	619.72	767.96	666.46	722.35	644.8	1221.21	1173.37	1158.85	932.28	1022.43	1318.76
scaffold3_18.2	270041	270643	NADH-quinone oxidoreductase subunit NuoI	1666	733.06	887.7	758.21	836.32	871.07	910.2	1024.94	1710.76	875.43	1025.71	1736.78
scaffold3_18.2	270640	271962	NADH-quinone oxidoreductase subunit NuoH	1667	673.56	885.33	758.8	844.15	718.81	1237.61	1160.48	1390.31	880.03	1039.94	1620.14
scaffold3_18.2	271959	274397	NADH-quinone oxidoreductase subunit G	1668	845.51	1133.6	937	1240.61	1170.88	932.13	987.68	1448.33	904.43	1112.56	1876.4
scaffold3_18.2	274394	275728	NADH-quinone oxidoreductase subunit NuoF	1669	701.03	985.18	784.51	911.1	928.37	1049.05	1104.03	1353.9	818.08	914.58	1573.12
scaffold3_18.2	275725	276510	NADH-quinone oxidoreductase subunit NuoE	1670	712.57	1039.41	810.58	934.34	1022.86	893.62	888.79	1333.28	879.65	1079.89	1675.85
scaffold3_18.2	276507	277808	NADH-quinone oxidoreductase subunit D	1671	569.41	895.86	671.91	850.94	934.6	876.31	819.26	1080.22	814.51	920.67	1168.22
scaffold3_18.2	277808	278632	NADH-quinone oxidoreductase subunit C	1672	623.48	757.01	712.95	933.87	917.48	539.73	540.37	1095.39	866.64	1039.76	1197.76
scaffold3_18.2	278629	279186	NADH-quinone oxidoreductase subunit B	1673	815.93	913.98	900.49	1317.34	1086.24	882.53	930.4	1203.96	823.96	995.13	1455.82
scaffold3_18.2	279281	279664	NADH-quinone oxidoreductase subunit A	1674	828.85	886.87	887.72	980.18	983.58	2209.4	1939.57	1551.79	566.66	603.57	2216
scaffold3_18.2	279761	281038	geranylgeranyl reductase family protein	1675	440.8	536.74	453.08	562.38	617.6	41.01	41.34	605.64	149.28	172.66	151.81
scaffold3_18.2	281262	281747	hypothetical protein	1676	7030.05	5043.28	6622.6	7571.32	6457.35	690	743.62	1347.02	327.49	400.26	105.68
scaffold3_18.2	281937	283100	chorismate-binding protein	1677	1080.23	912.18	1103.91	1044.56	842.31	721.01	717.83	263.94	904.76	1146.51	311.58
scaffold3_18.2	283166	284902	ABC transporter permease	1678	200.83	252.71	220.47	370.66	342.94	206.43	200.69	449.47	537.21	478.32	614.04
scaffold3_18.2	284899	285552	ABC transporter ATP-binding protein	1679	209.76	284.25	245.24	365.4	401.34	419.52	435.62	347.92	553.99	439.78	332.83
scaffold3_18.2	285701	286420	demethylmenaquinone methyltransferase	1680	285.69	316.03	316.37	398.83	412.01	196.89	194.54	181.44	164.18	107.71	161.34
scaffold3_18.2	286422	288170	TM0106 family RecB-like putative nuclease	1681	203.37	218.78	215.31	273.1	264.24	106.47	118.12	149.88	5.76	8.54	84.27
scaffold3_18.2	288452	290207	ABC transporter ATP-binding protein	1682	1045	1191.92	1136.92	1225.51	1279.07	389.84	374.96	233.27	0	0	286.42
scaffold3_18.2	290200	292485	hypothetical protein	1683	1730.15	1711.82	1718.15	755.91	686.61	655.97	660.09	558.11	0	0	2005.26
scaffold3_18.2	292487	293185	ABC transporter ATP-binding protein	1684	2603.43	2589.71	2503.29	1291.63	1061.13	3692.97	3939.24	1388.29	0	0	3752.13
scaffold3_18.2	293179	293481	peptidase inhibitor family I36 protein	1685	4013.56	3422.39	3759.41	5108.57	5241.74	6983.34	8181.72	2897.16	0	0	6060.68
scaffold3_18.2	293616	294503	1,4-dihydroxy-2-naphthoate polyprenyltransferase	1686	122.69	168.59	146.22	181.41	172.38	153.91	166.83	220.85	6.8	10.7	185.41
scaffold3_18.2	294708	295985	MFS transporter	1687	113.83	104.31	120.34	166.09	134.09	148.8	157.59	124.89	74.26	62.5	98.87
scaffold3_18.2	296074	297075	dihydroxyacetone kinase subunit DhaK	1688	240.86	216.57	256.44	229.72	211.52	260.79	243.4	343.36	696.71	660.88	577.52
scaffold3_18.2	297063	297719	dihydroxyacetone kinase subunit L	1689	1003.39	848.48	1006.49	845.77	762.5	511.95	560.51	703.35	722.47	631.86	1031.69
scaffold3_18.2	297712	298137	PTS-dependent dihydroxyacetone kinase phosphotransferase subunit DhaM	1690	1558.27	1195.61	1486.06	1359.15	1120.21	1024.61	1011.63	734.6	830.2	823.62	1007.68
scaffold3_18.2	298221	298679	cell division protein DedD	1691	317.49	339.8	321.19	302.23	368.45	293.29	284.7	440.27	552.85	484.16	337.8
scaffold3_18.2	298765	299748	cation transporter	1692	88.07	112.28	100.24	126.58	120.44	197.46	181.72	187.84	255.56	209.92	109.39
scaffold3_18.2	299749	299940	hypothetical protein	1693	28.33	33.15	26.41	39.66	49.32	30.8	29.34	94.79	160.61	126.62	27.01
scaffold3_18.2	299923	300888	L-lactate dehydrogenase	1694	726.4	650.87	691.29	670.7	685.68	356.35	339.66	365.68	285.63	181.67	138.65
scaffold3_18.2	300921	302423	patatin-like phospholipase family protein	1695	203.51	233.37	210.97	192.87	190.36	162.85	162.98	174.7	477.1	420.24	192.79
scaffold3_18.2	302502	303281	HAD family hydrolase	1696	450.34	598.27	479.47	545.89	640.03	643.43	626.2	563.73	624.58	579.75	694.31
scaffold3_18.2	303398	305254	right-handed parallel beta-helix repeat-containing protein	1697	44.85	42.36	42.68	69.47	59.26	99.41	107.16	133.16	83.79	89.27	247.57
scaffold3_18.2	305418	306551	ROK family transcriptional regulator	1698	73.21	72.73	71.34	93.38	89.25	65.34	55.44	126.5	164.22	225.79	126.71
scaffold3_18.2	306753	308345	DUF4091 domain-containing protein	1699	78.91	70.63	75.59	94.71	95.84	78.1	77.19	171.13	212.78	185.96	290.71
scaffold3_18.2	308342	309277	sugar ABC transporter permease	1700	66.22	77.45	69.86	110.01	146.43	114.7	103.77	120.91	508.49	393.88	258.17
scaffold3_18.2	309270	310196	carbohydrate ABC transporter permease	1701	66.95	63.55	64.16	78.46	77.95	137.39	95.88	135.72	298.49	310.7	234.23
scaffold3_18.2	310207	311529	extracellular solute-binding protein	1702	120.43	129.45	121.64	119.15	110.98	161.82	135.81	160.55	174.22	193.97	721.21
scaffold3_18.2	312444	313610	SH3 domain-containing protein	1704	537.36	608.85	625.6	673.51	466.94	110.24	105.85	798.36	787.8	647.03	303.24
scaffold3_18.2	314628	314765	carbohydrate ABC transporter permease	1708	19.92	14.49	16.08	20.25	14.34	201.55	139.83	51.32	545.85	549.58	48.76
scaffold3_18.2	314910	316217	carbohydrate ABC transporter substrate-binding protein	1709	29.32	31.6	26.82	38.11	36.11	60.61	50.13	83.3	83.57	80.58	17.82
scaffold3_18.2	316365	317321	alpha/beta hydrolase	1710	393.19	467.48	405.31	519.37	519	409.48	408.82	992.21	756.96	1055.95	1521.25
scaffold3_18.2	317337	317540	DUF3073 domain-containing protein	1711	912.59	1172.99	870.31	1239.52	1504.77	1671.39	1750.34	3148.24	1010.76	1322.2	5174.29
scaffold3_18.2	317676	318743	phosphoribosylformylglycinamidine cyclo-ligase	1712	424.51	610.41	491.63	482.45	503.05	252.69	252.06	743.14	570.31	510.69	607.43
scaffold3_18.2	318740	320227	amidophosphoribosyltransferase	1713	820.05	1079.99	905.49	900.16	998.64	536.63	606.98	723.21	475.12	408.85	470.01
scaffold3_18.2	320322	321566	MFS transporter	1714	173.2	195.81	183.13	227.24	184.84	244.17	263.3	631.98	268.13	319.91	455.83
scaffold3_18.2	321751	323094	dipeptidase	1715	464.92	457.17	450.07	421.28	410.25	383.18	392.18	336.79	470.61	425.08	388.88
scaffold3_18.2	323236	324003	slipin family protein	1716	67.02	73.58	66.11	90.46	78.8	89.37	87.65	136.03	288.98	289.77	297
scaffold3_18.2	324045	324797	hypothetical protein	1717	41.24	47.11	51.83	57.66	60.02	62.93	67.45	116.5	275.5	257.34	464.81
scaffold3_18.2	324794	327127	cbb3-type cytochrome c oxidase subunit I	1718	46.97	47.22	55.04	54.29	50.09	119.84	113.2	70.89	200.36	164.84	504.18
scaffold3_18.2	327285	329363	aminodeoxychorismate synthase component I	1719	104.94	149.66	116.1	129.25	128.39	259.28	225.7	282.62	245.72	237.43	155.38
scaffold3_18.2	329470	331722	phosphoribosylformylglycinamidine synthase subunit PurL	1720	598.8	723.71	658.85	930.33	972.35	680.5	719.48	896.43	694.17	673.21	1071.19
scaffold3_18.2	331862	333160	MFS transporter	1721	164.4	179.8	168.51	187.57	192.99	145.58	140.87	294.79	289.39	201.39	124.34
scaffold3_18.2	333170	335704	aminopeptidase N	1722	284.63	343.7	312.7	347.81	390.73	260.19	240.02	245.25	443.23	410.06	208.89
scaffold3_18.2	335853	336290	hypothetical protein	1723	153.11	248.4	153.01	150.5	192.8	729.92	647.74	713.98	556.66	771.2	1214.9
scaffold3_18.2	336623	337984	FAD-dependent oxidoreductase	1724	438.97	418.34	407.9	425.73	442.38	151.77	152.17	348.49	433.75	423.66	56.32
scaffold3_18.2	338057	339532	phosphatase PAP2 family protein	1725	68	62.9	70.78	68.9	59.41	46.2	44.03	106.07	170.64	181.08	32.53
scaffold4_18.0	105	587	GNAT family N-acetyltransferase	1726	319.57	312.02	309.78	295.59	306.73	749.2	803.95	416.81	650.3	620.93	338.06
scaffold4_18.0	723	1154	GtrA family protein	1727	317.76	313.58	311.89	289.05	321.54	429.58	517.01	337.69	594.2	628.46	365.59
scaffold4_18.0	1289	3217	oligopeptide transporter, OPT family	1728	721.37	615.5	692.1	506.3	429.46	694.61	640.21	503.69	823.94	759.68	331.36
scaffold4_18.0	3260	4123	aldo/keto reductase	1729	592.17	490.28	541.11	418.71	412.5	1331.11	1126.94	1488.77	1111.93	997.19	1428.06
scaffold4_18.0	4239	4871	peptide-methionine (S)-S-oxide reductase MsrA	1730	374.91	392.89	503.29	840.21	1155.41	2579.6	2812.91	3372.23	409.54	469.8	1071.57
scaffold4_18.0	5028	6649	sodium-dependent transporter	1731	57.2	71.48	66.46	65.49	57.41	77.5	76.06	165.22	256.44	362.23	190.39
scaffold4_18.0	6646	6750	methionine/alanine import family NSS transporter small subunit	1732	124.86	155.42	135.84	79.33	60.65	54.26	62.24	102.88	367.59	591.15	89.38
scaffold4_18.0	6778	7494	uracil-DNA glycosylase	1733	244.08	301.89	249.55	234.27	207.86	197.89	212.16	264.4	479.04	481.59	240.99
scaffold4_18.0	7629	8789	AI-2E family transporter	1734	69.64	76.73	76.36	81.22	67.81	206.02	182.27	195.47	652.03	700.53	375.36
scaffold4_18.0	8793	9182	hypothetical protein	1735	394.3	485.49	370.65	320.29	436.05	464.38	450.01	803.08	787.27	898.63	1016.32
scaffold4_18.0	9181	9810	hypothetical protein	1736	496.02	476.07	446.43	336.08	404.65	439.02	379.07	1078.15	1047.74	1299.07	1418.12
scaffold4_18.0	9912	10418	transcription elongation factor GreA	1737	1376.45	1504.23	1301.53	1295.97	1438.08	2952	2812.4	2666.56	1155.23	1383.9	3284.36
scaffold4_18.0	10440	10865	DUF4307 domain-containing protein	1738	48.36	47.75	45.53	41.9	47.17	35.81	37	117.22	151.14	183.03	48.7
scaffold4_18.0	10892	11083	GNAT family acetyltransferase	1739	1151.76	1410.02	1142.52	1184.94	1341.68	1770.1	1659.02	804.26	782.4	697.25	1509.98
scaffold4_18.0	11161	13176	thioredoxin domain-containing protein	1740	323.7	352.4	325.99	346.8	329.61	355.33	319.52	725.26	599.36	542.45	820.02
scaffold4_18.0	13198	14019	di-trans,poly-cis-decaprenylcistransferase	1741	883.18	897.94	852.05	983.66	1077.69	440.75	398.94	497.2	796.08	773.57	675.42
scaffold4_18.0	14164	14835	hemolysin III family protein	1742	228.6	294.4	204.83	229.02	254.59	129.23	144.93	199	398.78	468.37	2136.97
scaffold4_18.0	14952	16331	PhoH family protein	1743	269.47	264.94	274.86	261.28	292.61	129.86	121.14	95.1	248.39	167.72	172.96
scaffold4_18.0	16411	16926	DUF4245 domain-containing protein	1744	268.94	336.98	296.56	319.66	317.89	260.44	225.53	316.02	597.48	589.82	404.7
scaffold4_18.0	16953	17189	exodeoxyribonuclease VII small subunit	1745	95.65	118.59	104.19	111.98	137.69	77.85	58.3	254.49	341.78	367.46	149.29
scaffold4_18.0	17186	18433	exodeoxyribonuclease VII large subunit	1746	131.92	163.69	140.75	184.49	201.03	90.71	90.7	213.47	321	412.24	425.8
scaffold4_18.0	18514	21153	beta-propeller fold lactonase family protein	1747	20.55	16.44	20.65	20.06	19.37	39.49	35.32	80.3	114.61	121.54	37.16
scaffold4_18.0	21435	22406	4-hydroxy-3-methylbut-2-enyl diphosphate reductase	1748	353.39	446.06	360.47	431.04	476.38	415.45	396.56	911.58	593.5	534.19	610.93
scaffold4_18.0	22410	23630	DNA recombination protein RmuC	1749	183.54	201.06	195.5	335.5	375.25	319.82	297.57	321.98	617.37	619.79	453.74
scaffold4_18.0	23709	24995	M18 family aminopeptidase	1750	229.9	242.98	236.55	259.07	245.82	222.86	189.59	296.52	416.3	388.54	665.8
scaffold4_18.0	25145	26218	redox-regulated ATPase YchF	1751	414.95	632.5	440.45	408.03	527.44	318.91	281.22	586.74	775	718.02	1017.5
scaffold4_18.0	26349	27075	hypothetical protein	1752	199.63	301.32	213.42	366.13	372.1	211.54	199.91	390.74	428.69	415.53	230.38
scaffold4_18.0	27153	27620	phage tail protein	1753	104.58	129.95	110.06	109.38	125.27	157.64	138.74	181.44	348.55	342.21	171.89
scaffold4_18.0	27683	28858	MFS transporter	1754	58.57	67.98	58.59	50.56	53.46	69.97	62.13	90.06	314.33	355.95	147.96
scaffold4_18.0	28975	29406	MarR family transcriptional regulator	1755	59.28	56.53	63.04	50.25	66.25	100.74	90.2	99.2	225.98	221.88	73.08
scaffold4_18.0	29527	29955	organic hydroperoxide resistance protein	1756	1269.83	898.9	1160.15	778.04	684.7	247.67	226.16	830.15	589.91	554.62	2163.58
scaffold4_18.0	30075	30758	type 1 glutamine amidotransferase domain-containing protein	1757	842.13	599.41	752.43	405.67	337.47	179.08	168.85	782.71	490.1	450.65	1235.24
scaffold4_18.0	31697	33253	amino acid permease (Arginine/ornithine antiporter (periplasm))	1758	42.77	51.55	45.69	50.95	53.03	307.82	301.7	2129.94	536.82	363.49	3170.02
scaffold4_18.0	33384	34628	arginine deiminase	1759	36.23	33.03	34.3	19.61	16.61	173.89	176.44	1948.62	571.26	355.09	3393.39
scaffold4_18.0	34702	35706	ornithine carbamoyltransferase	1760	265.93	201.1	256.33	242.99	205.65	293.08	268.95	4484.94	912.59	781.17	6911.77
scaffold4_18.0	35727	36632	carbamate kinase	1761	253.1	176.47	240.87	252.35	184.72	362.4	338.27	4544.51	1006.21	913.41	7270.5
scaffold4_18.0	36768	37313	ArgR family transcriptional regulator	1762	227.13	232.86	220.29	220.14	280.09	162.01	159.35	529.42	457.84	433.55	835.88
scaffold4_18.0	37495	38157	peptidyl-tRNA hydrolase	1763	138.79	138.45	152.89	121.5	151.22	88.09	82.74	146.75	452.79	386.39	144.35
scaffold4_18.0	38181	38699	amino acid-binding protein	1764	657.97	893.88	621.61	587.55	703.29	1222.66	1116.24	594.07	781.06	783.87	832.37
scaffold4_18.0	38725	39693	aldo/keto reductase	1765	881.7	985.95	870.43	702.58	793.57	972.52	912.74	612.59	683.14	719.26	743.65
scaffold4_18.0	39746	40249	thiol peroxidase	1766	530.61	451.5	502.93	388.79	402	340.68	279.67	968.34	864.37	672.84	298.23
scaffold4_18.0	40329	41834	amino acid permease	1767	119.23	121.89	121.29	88.32	87.72	59.04	51.63	150.21	406.92	283.47	112.94
scaffold4_18.0	41882	43126	alpha-amylase family protein	1768	118.56	145.18	127.95	112.81	124.91	125.14	122.69	217.89	406.94	354.06	230.58
scaffold4_18.0	43142	44308	nucleotide sugar dehydrogenase	1769	232.06	204.14	228.45	177.41	188.87	126.85	136.99	133.63	407.2	393.33	136.36
scaffold4_18.0	44439	45392	alpha/beta hydrolase	1770	385.83	350.56	386.28	268.07	273.7	147.19	130.34	204.02	90.15	93.03	28.89
scaffold4_18.0	45938	47848	methylmalonyl-CoA mutase small subunit	1771	1680.07	1412.25	1609.14	1673.99	1420	846.66	831.78	607.21	784.37	804.48	951.62
scaffold4_18.0	47845	50034	methylmalonyl-CoA mutase	1772	1602.06	1354.35	1592.2	1606.79	1516.47	1157.57	1148.46	676.58	802.53	769.45	1053.37
scaffold4_18.0	50188	51234	methylmalonyl Co-A mutase-associated GTPase MeaB	1773	769.1	892.82	749.06	745.38	768.88	728.97	644.02	667.79	753.39	839.19	1448.86
scaffold4_18.0	51458	52930	S8 family serine peptidase	1774	454.95	444.72	450.73	325.95	335.12	205.43	212.16	407.44	540.22	506.32	264.41
scaffold4_18.0	53008	53223	RNA-binding S4 domain-containing protein	1775	202.09	295.79	213.68	237.75	212.71	609.54	541.19	521.72	825.62	860.27	800.5
scaffold4_18.0	53269	54030	amino acid ABC transporter ATP-binding protein	1776	31.74	25.66	31.42	28.16	23	40.85	33.93	62.57	159.96	191.61	30.33
scaffold4_18.0	54066	54614	ABC transporter permease subunit	1777	45.74	51.51	49.06	21.83	26.9	23.06	22.49	77.63	210.49	153.51	19.61
scaffold4_18.0	55031	55957	ABC transporter substrate-binding protein	1778	944.74	840.68	999.57	527.17	430.55	187.91	195.88	51.52	0	0	0
scaffold4_18.0	56681	57364	ATP-binding cassette domain-containing protein	1779	887.38	1109.61	906.69	923.04	740.63	747.28	687.16	384.5	60.47	53.32	40.58
scaffold4_18.0	57433	59535	ABC transporter permease	1780	380.54	400.85	371.91	292.95	245.81	149.39	149.79	394.8	196.77	221.63	76.26
scaffold4_18.0	59586	59824	hypothetical protein	1781	106.33	138.79	118.02	73.97	67.03	59.63	65.81	203.32	146.79	142.42	10.33
scaffold4_18.0	59895	60749	metal ABC transporter permease	1782	73.92	82.84	74.88	42.93	45.71	200.31	179.4	89.06	98.84	69.61	40.08
scaffold4_18.0	60764	61567	ABC transporter ATP-binding protein	1783	144.59	153.3	142.79	114.95	112.73	456.23	514.21	140.31	101.82	77.02	37.16
scaffold4_18.0	61609	62526	zinc ABC transporter substrate-binding protein	1784	54.62	96.22	62.08	47.43	52.03	3006.04	3358.76	188.09	100.53	88.43	37.69
scaffold4_18.0	62643	63194	isochorismatase family protein	1785	40.49	42.26	43.03	32.17	50.06	33.46	35.99	57.77	121.61	113.77	8.79
scaffold4_18.0	63191	64654	cytosine permease	1786	66.7	57.82	73.83	52.76	54.96	61.94	60.65	81.93	165.26	119.47	14.91
scaffold4_18.0	64744	68202	bifunctional proline dehydrogenase/L-glutamate gamma-semialdehyde dehydrogenase	1787	131.37	158.53	142.09	132.19	131.03	97.81	87.86	119.28	65.26	65.2	95.01
scaffold4_18.0	68233	69282	alcohol dehydrogenase catalytic domain-containing protein	1788	130.7	123.34	131.22	145.11	133.7	130.83	133.53	190.77	95.34	84.03	165.51
scaffold4_18.0	69402	71132	dihydroxyacetone kinase family protein	1789	54.88	52.19	58.7	57.7	50.65	55.14	58.94	81.25	147.19	166.05	60.39
scaffold4_18.0	71123	71626	phosphoribosyltransferase	1790	413.47	429.21	438.34	335.01	348.55	391.42	384.29	96.25	360.09	345.62	122.5
scaffold4_18.0	71716	72216	N-acetyltransferase	1791	189.27	193.7	189.55	168.76	176.4	83.38	78.3	126.08	327.38	257.32	132.62
scaffold4_18.0	72580	74127	Re/Si-specific NAD(P)(+) transhydrogenase subunit alpha	1792	1769.3	1652.06	1666.22	1675.25	1599.12	915.88	944.3	325.75	642.19	602.04	315.65
scaffold4_18.0	74131	75552	NAD(P)(+) transhydrogenase (Re/Si-specific) subunit beta	1793	1475.65	1347.03	1471.68	1151.04	1091.32	799.83	802.67	292.52	749.6	811.96	481.55
scaffold4_18.0	75698	76018	ferredoxin family protein	1794	1439.95	1576.15	1400.94	1434.23	1678.13	614.78	711.53	789.49	803.38	777.7	460.14
scaffold4_18.0	76015	77118	succinyldiaminopimelate transaminase	1795	959.12	932.71	939.6	958.85	869.58	795.63	821.93	750.29	697.67	778.24	483.15
scaffold4_18.0	77119	77961	hypothetical protein	1796	678.82	766.22	682.53	580.76	669.75	487.01	521.81	512.81	593.33	617.34	265.95
scaffold4_18.0	78059	79021	2,3,4,5-tetrahydropyridine-2,6-dicarboxylate N-succinyltransferase	1797	1024.72	1302.8	1007.72	915.76	1178.52	742.55	777.72	531.3	533.81	483.78	314.28
scaffold4_18.0	79117	79413	hypothetical protein	1798	161.77	192.38	167.78	264.1	313.13	325.35	306.3	86.74	112.34	110.44	110.28
scaffold4_18.0	79403	80533	serine/threonine protein kinase	1799	605.67	476.63	599.11	659.52	608.9	222.51	195.54	61.39	92.19	109.35	93.88
scaffold4_18.0	80657	81718	EamA family transporter	1800	298.73	317.63	301.24	233.14	273.29	347.01	345.81	150.85	200.93	243.66	115.71
scaffold4_18.0	81734	83029	MFS transporter	1801	354.03	440.72	381.43	278.84	307.8	196.26	210.94	469.87	202.06	208.66	188.58
scaffold4_18.0	83043	83651	TetR family transcriptional regulator	1802	101.26	107.72	101.76	68.01	79.68	106.7	107.66	130.08	122.65	117.71	29.13
scaffold4_18.0	83775	84854	succinyl-diaminopimelate desuccinylase	1803	288.57	477.38	319.05	292.86	301.8	508.8	519.19	996.21	627.55	659.02	1461.37
scaffold4_18.0	84899	85204	DivIVA domain-containing protein	1804	461.53	637.32	511.87	572.3	646.51	1053.15	922.21	1604.26	784.04	753.81	1485.86
scaffold4_18.0	85245	85412	DUF3117 domain-containing protein	1805	566.62	619.19	568.56	878.54	1408.57	2294.07	2548.43	1649.59	1063.42	1274.59	1607.89
scaffold4_18.0	85521	86656	glycogen synthase	1806	305.57	318.19	308.47	292.11	288.46	402.71	367.22	223.48	578.08	500.71	326.3
scaffold4_18.0	86800	88026	glucose-1-phosphate adenylyltransferase	1807	1072.19	908.95	995.92	951.97	900.27	640.37	618.34	259.86	349.09	285.53	189.93
scaffold4_18.0	88109	88762	class I SAM-dependent methyltransferase	1808	1323.18	1129.08	1268.5	1465.43	1610.8	1139.01	1180.42	969.59	563.22	582.13	704.95
scaffold4_18.0	88832	89713	4-hydroxy-tetrahydrodipicolinate synthase	1809	1065.99	749.8	959.17	653.2	653.13	498.09	464.78	210.56	574.03	565.13	291.03
scaffold4_18.0	89764	90177	Sec-independent protein translocase subunit TatB	1810	1136.87	877.75	1099.6	747.65	742.61	1082.19	962.43	266.76	993.46	1003.96	396.41
scaffold4_18.0	90332	91813	cellulase family glycosylhydrolase	1811	221.26	218.92	224.37	282.05	243.85	74.97	68.79	241.89	662.72	605.21	198.9
scaffold4_18.0	91962	93122	Mrp/NBP35 family ATP-binding protein	1812	232.19	210.43	241.97	181.17	186.72	234.64	217.41	500.8	485.16	351.44	388.41
scaffold4_18.0	93184	93699	DUF1003 domain-containing protein	1813	160.42	186.51	162.62	147.37	153.73	126.88	109.41	256.98	578.33	523.41	153.11
scaffold4_18.0	93692	94957	magnesium transporter	1814	199.61	194.55	215.49	193.34	191.79	121.81	124.25	215.23	391.35	354.52	98.84
scaffold4_18.0	95063	95572	hypothetical protein	1815	540.44	727.93	527.85	671.14	819	621.13	642.89	388.39	468.57	454.03	583.76
scaffold4_18.0	95686	96558	COX15/CtaA family protein	1816	257.9	271.44	260.87	238.26	223.93	199	193.11	231.67	632.77	715.53	419.83
scaffold4_18.0	96589	98085	aminopeptidase P family protein	1817	839.91	701.25	745.3	554.75	567.85	353.74	358	173.25	496.74	414.75	122.25
scaffold4_18.0	98708	99063	hypothetical protein	1818	117.38	190.41	135.3	84.18	84.12	109.27	119.96	98.21	193.27	159.51	74.72
scaffold4_18.0	99614	100351	nucleic acid-binding protein	1819	682.79	700.78	643.81	497.7	648.9	540.16	490.32	855.86	751.05	751.4	723.56
scaffold4_18.0	102276	103340	type I restriction enzyme HsdR N-terminal domain-containing protein	1821	290.37	348.78	286.65	189.04	193.83	725.47	587.21	610.55	0	0	0.31
scaffold4_18.0	103817	104224	DUF2335 domain-containing protein	1822	778.39	829.68	798.32	1669.86	1942.88	1517.08	1470.01	1678.74	0	0	0
scaffold4_18.0	104428	105036	hypothetical protein	1823	150.07	159.1	147.21	369.5	367.14	390.16	331.51	230.74	0	0	0
scaffold4_18.0	105123	105281	antitoxin HicB	1824	49.16	58.48	54	78.13	77.87	81.38	75.42	147.83	253.03	367.54	37.92
scaffold4_18.0	105777	106790	ABC transporter substrate-binding protein	1825	77.04	73.34	79.57	86.66	85.44	204.31	185.66	132.84	589.16	543.02	102.46
scaffold4_18.0	106787	107821	iron chelate uptake ABC transporter family permease subunit	1826	70.26	97.34	82.29	98.29	88.72	67.55	69.67	190.2	378.61	468.35	162.57
scaffold4_18.0	107818	108615	ABC transporter ATP-binding protein	1827	49.88	62.48	52.58	57.37	61.94	38.52	43.35	156.87	282.89	341.02	74.46
scaffold4_18.0	108612	109232	(2Fe-2S) ferredoxin domain-containing protein	1828	102.24	116.95	107.71	73.19	80.94	51.4	56.11	134.58	292.99	377.37	127.53
scaffold4_18.0	109267	109482	YbdD/YjiX family protein	1829	136.1	175.49	129.82	77.9	80.33	88.56	60.31	60.56	277.21	364.7	27.67
scaffold4_18.0	109479	111764	carbon starvation protein A	1830	203.07	181.81	197.71	120.71	121.36	59.46	62.55	56.19	236.67	237.64	85.34
scaffold4_18.0	112127	112300	peptide ABC transporter ATP-binding protein	1831	506.9	602.09	490.91	477.03	567.01	271.99	231.78	174.35	318.75	348.11	52.4
scaffold4_18.0	112307	113161	type I methionyl aminopeptidase	1832	964.49	942.41	965.33	720.03	917.89	501.32	481.28	134.96	550.09	359.34	126.79
scaffold4_18.0	113173	113393	hypothetical protein	1833	17.86	20.09	21.24	22.11	20	18.1	27.33	57.84	58.89	20.62	9.67
scaffold4_18.0	113543	114412	DUF2510 domain-containing protein	1834	243.81	295.33	250	252.02	295.42	387.44	338.84	339.39	429.3	348.59	188.62
scaffold4_18.0	114516	115817	glutamine synthetase	1835	394.45	652.97	446.16	588.54	687.89	477.06	443.32	1185.88	489.59	421.01	985.45
scaffold4_18.0	115836	116639	hypothetical protein	1836	192.5	207.52	203.28	227.4	224.01	126.02	120.93	532.37	313.97	330.12	208.74
scaffold4_18.0	116769	119720	bifunctional [glutamine synthetase] adenylyltransferase/[glutamine synthetase]-adenylyl-L-tyrosine phosphorylase	1837	147.4	153.58	138.09	113.79	126.94	60.42	58.82	117.2	231.26	212.76	112.82
scaffold4_18.0	119714	121036	threonine/serine exporter family protein	1838	481.36	459.78	466.69	325.47	364.47	316.2	293.33	142.51	709.12	553.93	135.46
scaffold4_18.0	121043	122224	Nif3-like dinuclear metal center hexameric protein	1839	259.1	240.23	255.34	166.84	191.84	146.7	169.27	156.26	164.56	155.02	34.66
scaffold4_18.0	122246	122383	GntR family transcriptional regulator	1840	79.52	116.28	89.16	68.95	70.71	44.36	56.67	69.39	242.01	254.06	72.27
scaffold4_18.0	122991	123398	hypothetical protein	1841	139.35	169.4	158.82	158.71	179.22	135.89	144.84	359	236.11	164.25	176.64
scaffold4_18.0	123481	124902	type I glutamate--ammonia ligase	1842	657.63	718.87	724.68	794.42	988.33	633.15	571.98	318.05	773.01	650.98	396.07
scaffold4_18.0	125015	125437	RDD family protein	1843	187.61	265.65	215.45	291.23	336.23	504.61	503.54	448.62	510.06	528.42	623.14
scaffold4_18.0	125443	126555	glycosyltransferase	1844	202.56	280.47	213.07	228.18	270.38	265.55	270.5	656.72	539.73	607.24	608.77
scaffold4_18.0	126579	127187	DedA family protein	1845	163.88	208.49	178.49	169.19	185.89	161.33	150.62	572.18	556.42	547.54	365.24
scaffold4_18.0	127266	128654	PTS transporter subunit EIIC	1846	26.83	35.61	35.73	37.5	30.8	93.82	97	93.19	484.25	345.3	58.83
scaffold4_18.0	128831	129556	GntR family transcriptional regulator	1847	247.8	331.53	287.46	204.43	259.1	173.2	158.76	191.57	461.14	369.49	132.08
scaffold4_18.0	129496	129801	PTS glucose/sucrose transporter subunit IIB	1848	266.5	323.41	297.48	215.72	273.21	232.27	208.29	132.23	746.34	648.39	195.09
scaffold4_18.0	129931	130161	PTS glucose/sucrose transporter subunit IIB	1849	366.63	359.28	373.61	458.73	402.78	405.6	430.37	814.65	215.4	224.47	169.21
scaffold4_18.0	130161	130607	PTS glucose transporter subunit IIA	1850	355.79	364.63	376.69	458.53	350.59	394.76	445.99	694.46	2.26	3.04	0
scaffold4_18.0	130807	133722	beta-N-acetylglucosaminidase domain-containing protein	1851	115.18	119.87	107.22	126.28	143.95	189.97	189.73	194.28	0	0	0
scaffold4_18.0	134256	135164	ABC transporter substrate-binding protein	1852	9.85	9.15	8.73	5.22	9.14	13.03	11.05	95.63	0	0	0
scaffold4_18.0	135161	136234	iron ABC transporter permease	1853	10.89	9.69	9.35	10.32	10.65	10.94	9.53	99.17	0	0	0
scaffold4_18.0	136267	137004	heme ABC transporter ATP-binding protein	1854	11.76	12.04	14.73	14.67	16.03	21.12	30.15	94.38	0	0	0
scaffold4_18.0	137001	138188	enterochelin esterase-like enzyme	1855	34.82	39.19	34.02	32.51	35.87	74.09	62.19	133.56	0	0	0
scaffold4_18.0	138460	139533	DUF2029 domain-containing protein	1856	121.24	171.89	130.79	104.04	121.25	90.18	81.1	172.8	119.03	108.7	56.49
scaffold4_18.0	139638	141443	ABC-F family ATP-binding cassette domain-containing protein	1857	241.49	294.38	251.52	222.9	227.23	184.95	180.89	223.88	228.15	213.51	106.73
scaffold4_18.0	141451	142221	DUF4191 domain-containing protein	1858	490.68	514.05	522.49	465.8	484.11	481.58	458.76	417.86	644.63	606.57	525.33
scaffold4_18.0	142423	143940	exo-alpha-sialidase	1859	44.45	54.85	46.48	29.09	33.93	64.31	62.07	65.41	139.11	138.37	20.68
scaffold4_18.0	144189	146504	exo-alpha-sialidase	1860	100.74	128.5	101.82	81.99	85.25	151.92	123.42	95.02	192.79	207.76	30.29
scaffold4_18.0	146577	148109	MFS transporter	1861	42.87	54.41	44.92	45.96	47.87	97.63	94.97	43.59	55.11	47.56	4.1
scaffold4_18.0	148486	148718	hypothetical protein	1862	118.48	108.21	109.72	120.88	109.68	319.52	223.14	229.45	215.38	173.26	265.71
scaffold4_18.0	148822	149625	CAMP factor pore-forming toxin 2	1863	2051.33	1331.06	2103.9	2034.23	1841.64	1875.85	1949.02	203.06	1064.47	1140.53	93.08
scaffold4_18.0	151017	152009	lipoyl synthase	1864	381.61	434.26	411.27	265.38	324.04	251.23	211.83	329.65	617.88	620.66	463.08
scaffold4_18.0	152020	154263	copper-translocating P-type ATPase	1865	268.15	328.94	263.8	226.66	235.19	170.9	154.36	189.26	384.89	388.54	195.26
scaffold4_18.0	154260	156203	cytochrome c oxidase assembly protein	1866	345.6	354.51	337.82	258.07	262.9	141.94	151.93	197.81	518.4	538.45	137.64
scaffold4_18.0	156253	157071	lipoyl(octanoyl) transferase LipB	1867	449.2	444.28	463.69	335.96	380.12	227.09	216.4	122.23	510.88	400.68	115.65
scaffold4_18.0	157245	158481	2-oxoglutarate dehydrogenase, E2 component, dihydrolipoamide succinyltransferase	1868	1519.41	1048.46	1415.37	1231.28	1180.94	524.57	602.39	509.89	573.14	585.79	564.81
scaffold5_19.6	8	562	adhesin	1869	121.5	192.8	130.42	98.74	121.85	374.44	378.45	138.41	10.88	14.64	66.63
scaffold5_19.6	1749	2702	ATPase	1870	102.99	120.13	109.27	165.13	139.16	127.74	136.88	168.35	503.17	430.11	173.06
scaffold5_19.6	2780	3454	phosphoribosylformylglycinamidine synthase subunit PurQ	1871	890.34	819.54	923.17	954.81	841.54	865.2	958.35	1266.05	929.85	893.56	1286.96
scaffold5_19.6	3457	4722	phosphoribosylaminoimidazolesuccinocarboxamide synthase	1872	798.83	806.96	825.01	742.76	670.69	603.62	590.71	734.96	804.42	645.05	852.63
scaffold5_19.6	4857	5420	alkyl hydroperoxide reductase subunit C	1873	178.77	117.57	166.79	168.61	155.76	337.89	378.83	536.69	693.82	912.17	4097.47
scaffold5_19.6	5516	7090	alkyl hydroperoxide reductase subunit F	1874	63.54	65.44	65.18	108.95	100.77	99.79	109.73	147.32	275.61	269.87	870.28
scaffold5_19.6	7097	8041	hydrogen peroxide-inducible genes activator	1875	115.48	143.45	121.97	162.16	156.33	161.09	167.48	221.97	519.96	552.61	1121.36
scaffold5_19.6	8075	9508	adenylosuccinate lyase	1876	315.12	451.41	355.07	361.23	341.73	448.3	442.64	525.75	696.53	555.16	574.87
scaffold5_19.6	9505	10824	phosphoribosylamine--glycine ligase	1877	573.46	658.54	607.86	800.1	683.86	553.93	559.47	715.4	655.66	648.5	832.8
scaffold5_19.6	10883	12169	adenylosuccinate synthase	1878	640.59	775.31	709.2	946.91	893.26	980.92	894.08	895.83	783.57	781.12	962.08
scaffold5_19.6	12336	13247	GNAT family N-acetyltransferase	1879	318.4	342.43	310.86	533.41	464.72	617.72	579.49	808.89	571.53	569.13	671.74
scaffold5_19.6	13365	14099	FadR family transcriptional regulator	1880	157.8	168.52	177.34	171.94	173.95	282.96	293.7	205.32	449.79	285.42	201.25
scaffold5_19.6	14224	14913	N-acetylmannosamine-6-phosphate 2-epimerase	1881	114.1	126.82	128.39	149.2	161.73	89.16	82.99	186.69	308.81	282.47	127.9
scaffold5_19.6	14946	15917	dihydrodipicolinate synthase family protein	1882	83.2	93.08	85.32	102.69	94.47	61.72	55.36	120.92	206.63	147.23	88.78
scaffold5_19.6	15914	16816	DUF4862 family protein	1883	75.36	70.96	74.87	115.1	95.7	118.5	104.62	155.76	195.74	224.17	141.17
scaffold5_19.6	16841	18445	MFS transporter	1884	70.49	109.06	71.75	92.45	132.44	115.65	105.82	136.66	156.48	129.05	42.16
scaffold5_19.6	18573	19100	DUF3151 domain-containing protein	1885	585.25	980.21	602.44	901.15	1103.53	562.32	574.34	1002.11	619.72	608.73	1358.79
scaffold5_19.6	19498	21360	translational GTPase TypA	1886	308.97	394.86	354.91	363.22	440.23	335.8	316.93	218.97	586.74	473.54	96.44
scaffold5_19.6	21474	21839	hypothetical protein	1887	489.34	453.09	490.06	583.03	586.43	177.59	238.02	154.58	264.42	158.5	38.57
scaffold5_19.6	21907	22260	L,D-transpeptidase	1888	263.94	301.15	297	359.78	419.54	387.66	413.86	204.78	557.53	441.82	175.47
scaffold5_19.6	22416	22778	biotin/lipoyl-binding protein	1889	3094.29	2464.82	2859.97	4354.9	4003.11	2557.04	2897.1	1154.68	995.13	1165.52	1804.35
scaffold5_19.6	22794	23036	hypothetical protein	1890	2742.83	2116.4	2675.08	3714.89	3208	2077.76	2492.81	1326.12	945.31	1167.5	2102.97
scaffold5_19.6	23063	24637	acyl-CoA carboxylase subunit beta	1891	2955.23	2212.82	2923.77	3551.37	3030.89	1816.22	1942.23	1131.48	938.9	1059.45	1791.94
scaffold5_19.6	24653	26146	methylmalonyl-CoA carboxytransferase subunit 5S	1892	2688.11	2251.54	2635.21	2801.32	2646.5	1571.69	1696.76	638.52	900.77	973.6	1129.29
scaffold5_19.6	26466	27824	aerotaxis receptor Aer	1893	127.89	143.09	144.06	195.29	170.93	164.88	179.99	465.46	573.79	541.53	391.37
scaffold5_19.6	28361	29386	class II fructose-bisphosphate aldolase	1894	1285.01	1261.62	1284.19	1460.44	1452.99	1807.7	1752.82	2185.83	914.11	973.73	4101.11
scaffold5_19.6	29497	29979	hypothetical protein	1895	161.45	281.24	187.48	165.19	192.38	165.64	186.26	279.71	374.01	295.41	410.18
scaffold5_19.6	30121	30615	TrmH family RNA methyltransferase	1896	207.69	302.3	238.51	239.32	262.21	303.42	281.58	185.5	317.21	293.46	129.33
scaffold5_19.6	30825	31553	VTT domain-containing protein	1897	204.56	282.76	215.06	172.66	210.85	964.34	993.31	173.43	662.8	566.06	162.01
scaffold5_19.6	31591	32076	hypothetical protein	1898	285.83	373.62	304.85	298.2	352.31	701.98	766.51	693.52	843.58	866.91	695.95
scaffold5_19.6	32239	33042	fused MFS/spermidine synthase	1899	165.15	179.57	171.13	172.26	184.69	215.91	212.94	179.73	416.35	394.87	155.64
scaffold5_19.6	33039	34097	glycine betaine ABC transporter substrate-binding protein	1900	327.61	339.59	320.91	332.43	367.22	136.44	120.94	199.34	444.3	326.65	162.92
scaffold5_19.6	34196	34573	SEC-C domain-containing protein	1901	118.09	207.6	134.89	130.9	153.37	66.72	61.72	117.3	189.41	86.4	69.63
scaffold5_19.6	34763	36274	MFS transporter	1902	92.6	106.13	89.79	75.7	99.77	132.79	116.37	136.48	310.14	203.04	31.08
scaffold5_19.6	36425	38998	ATP-dependent chaperone ClpB	1903	1336.82	774.09	1109.03	1195.04	1167.69	403.24	358.77	171.32	633.84	726.98	212.56
scaffold5_19.6	39305	40663	branched-chain amino acid transport system II carrier protein	1904	131.74	127.02	140.24	131.66	129.27	84.46	100.05	178.05	299.81	281.6	96.17
scaffold5_19.6	40676	41416	HAD-IIB family hydrolase	1905	232.37	217.73	222.02	180.76	175.16	180.11	177.97	528.1	567.98	551.88	257.45
scaffold5_19.6	41498	42442	fructose bisphosphate aldolase	1906	2165.1	1382.05	1952.59	1648.39	1808.26	888.44	842.2	209.08	761.76	881.99	669.98
scaffold5_19.6	42472	43041	flavin reductase	1907	236.52	293.3	260.46	406.9	398.47	192.18	192.02	254.57	342.16	323.38	255.37
scaffold5_19.6	43038	44249	Nramp family divalent metal transporter	1908	92.04	95.72	94.83	104.15	120.69	109.12	91.51	239.79	469.62	428.87	195.03
scaffold5_19.6	44462	45645	sensor histidine kinase	1909	70.9	86.13	77.19	99.07	111.41	133.77	127.21	132.57	512.68	528.44	375.75
scaffold5_19.6	45677	46351	response regulator transcription factor	1910	96.33	133.1	110.67	126.28	119	111.22	110.68	158.82	198.85	229.39	220.65
scaffold5_19.6	46497	47231	ABC transporter ATP-binding protein	1911	21.17	27.79	27.58	37.73	34.35	266.73	304.71	91.58	299.74	282.4	182.17
scaffold5_19.6	47228	49651	FtsX-like permease family protein	1912	47.49	54.91	48.66	64.9	58.55	223.17	249.14	162.42	407.7	396.91	263.46
scaffold5_19.6	49687	50067	NUDIX domain-containing protein	1913	114.89	126.82	127.06	180.6	189.79	235.31	201.88	141.81	440.1	573.32	203.4
scaffold5_19.6	50223	51581	amino acid permease	1914	148.29	187.7	167.94	200.96	207.89	132.9	118.63	118.59	273.06	307.89	93.53
scaffold5_19.6	51623	53200	transporter	1915	267.92	360.62	296.88	347.13	335.38	446.77	445.47	391.54	477.95	477.38	316.11
scaffold5_19.6	53403	54446	zinc-binding dehydrogenase	1916	322.21	293.25	333.26	351.15	321.57	337.52	304.33	314.08	402.04	381.95	240.5
scaffold5_19.6	54550	55458	SGNH/GDSL hydrolase family protein	1917	555.89	597.11	538.66	636.96	717.13	527.31	455.9	1002.99	742.12	851.21	864.31
scaffold5_19.6	55562	56023	helix-turn-helix transcriptional regulator	1918	823.55	622.36	737.01	1190.07	1095.44	802.69	714.18	1114.7	767.16	932.71	597.46
scaffold5_19.6	56025	57167	molecular chaperone DnaJ	1919	1726.31	1181.38	1552.75	2451.05	2357.87	753.58	773.64	1682.05	837.58	1004.43	1506.94
scaffold5_19.6	57241	57906	nucleotide exchange factor GrpE	1920	2817.93	1800.52	2392.84	3494.3	3291.72	2169.34	2158.2	1531.68	811.2	938.4	1125.53
scaffold5_19.6	57991	59844	molecular chaperone DnaK	1921	4058.49	2562.59	3602.39	4870.81	4301.06	1647.6	1627.11	1696.45	842.34	942.72	1510.07
scaffold5_19.6	60104	60337	hypothetical protein	1922	206.35	232.44	266.71	273.05	264.73	207.38	187.78	370.65	577.44	457.01	153.06
scaffold5_19.6	60334	61479	inorganic phosphate transporter	1923	808.23	960.61	917.89	1038.41	992.61	1001.31	980.95	914.85	674.02	571.37	403.38
scaffold5_19.6	61904	62635	response regulator transcription factor	1924	588.45	942.22	661.39	667.06	804.64	456.51	523.92	71.04	262.72	171.49	40.74
scaffold5_19.6	63149	63375	hypothetical protein	1925	20.94	37.23	21.1	25.06	22.12	111.75	89.65	32.13	207.05	213.48	17.51
scaffold5_19.6	63398	64072	deoxyribose-phosphate aldolase	1926	268.98	286.62	271.03	316.59	311.93	428.78	441.26	380.42	790.5	841.42	641.71
scaffold5_19.6	64096	64824	ThuA domain-containing protein	1927	651.81	715.18	660.9	965.99	1057.68	969.07	898.62	1541.49	976.54	1031.99	1012.48
scaffold5_19.6	64971	66146	FHA domain-containing protein	1928	909.42	969.72	898.91	1075.83	1131.22	649.39	679.44	605.02	721.29	786.77	799.24
scaffold5_19.6	66319	68970	pyruvate, phosphate dikinase	1929	2759.32	2275.58	2680.95	2294.92	2215.39	744.85	770.33	335.38	541.21	603.01	529.23
scaffold5_19.6	69308	70192	kinase/pyrophosphorylase	1930	225.1	321.22	223.43	315.32	386.83	268.8	284.16	151.54	215.76	340.67	288.18
scaffold5_19.6	70285	71373	methyltransferase	1931	59.36	66.87	64.88	68.99	69.74	45.93	49.81	124.95	83.25	64.46	33.72
scaffold5_19.6	71452	72309	phosphoserine phosphatase SerB	1932	71.61	104.59	87.32	82.64	112.13	57.5	65.86	140.28	216.97	164.27	89
scaffold5_19.6	72312	73121	D-hexose-6-phosphate mutarotase	1933	86.18	102.9	100.22	115.42	127.22	103.95	107.2	185.2	176.1	143.85	71.62
scaffold5_19.6	73399	74913	acetyl-CoA hydrolase/transferase family protein	1934	857.32	593.9	858.01	873.42	752.99	992.59	1056.68	357.89	647.64	688.77	157.86
scaffold5_19.6	75124	76530	amidase	1935	1478.85	1512.84	1503.02	2277.78	2158.67	459.41	563.6	209.18	245.89	203.06	98.79
scaffold5_19.6	76699	77310	hypothetical protein	1936	380.82	482.33	403.65	385.08	412.43	238.95	298.61	166.55	361.89	372.27	146.23
scaffold5_19.6	77712	77858	hypothetical protein	1938	84.21	138.11	95.51	160.75	192.71	325.39	286.22	170.57	199.23	199.16	834.91
scaffold5_19.6	77969	78358	type II toxin-antitoxin system VapC family toxin	1939	67.91	97.49	78.95	100.71	130.3	505.43	438.9	203.37	324.97	288.88	3443.95
scaffold5_19.6	78355	78582	toxin-antitoxin system, antitoxin component	1940	28.11	43.07	36.77	47.22	74.91	665.54	589.09	118.21	377.09	208.73	2521.98
scaffold5_19.6	79027	80301	nucleoside hydrolase	1941	52.74	55.89	53.71	63.54	75.01	44.37	39.38	190.12	68.84	68.36	144.11
scaffold5_19.6	80410	80859	hypothetical protein	1942	403.78	532.58	418.81	499.57	618.01	263.98	288.38	221.21	0	0	333.07
scaffold5_19.6	80856	80999	thioredoxin	1943	433.32	504.49	465.97	492.71	584.12	187.92	209.33	106.65	0	0	117.2
scaffold5_19.6	81226	81702	cupin domain-containing protein	1944	277.09	215.65	246.48	293.65	271.56	110.27	134.62	94.74	0	0	53.34
scaffold5_19.6	82014	82658	TetR/AcrR family transcriptional regulator	1945	174.96	202.7	177.46	266.33	264.35	185.07	201.33	378.23	0	0	607.29
scaffold5_19.6	82655	84448	ABC transporter ATP-binding protein	1946	19.15	19.75	19.04	46.81	38.03	55.5	52.52	120.75	25.36	24.32	68.21
scaffold5_19.6	84445	86265	ABC transporter ATP-binding protein	1947	22.71	23.84	20.76	37.7	48.99	48.7	44.62	109.51	1.11	2.25	75.63
scaffold5_19.6	86262	86450	permease	1948	7.7	11.85	7.93	21.98	11.62	13.66	14.31	107.2	0	0	11.45
scaffold5_19.6	86760	87443	EcsC family protein	1949	694.7	615.09	622.18	811.79	839.88	681.38	708.23	485.49	103.52	112.8	448.62
scaffold5_19.6	87474	88745	threonine/serine exporter family protein	1950	394.83	491.46	409.76	368.34	308.63	118.35	132.75	242.75	0	0	119.17
scaffold5_19.6	88824	89528	hypothetical protein	1951	287.38	421.46	333.9	318.65	269	89.96	90.37	106.71	17.23	9.68	66.21
scaffold5_19.6	89525	90877	ABC transporter permease	1952	478.31	561.89	542.4	511.04	425.22	183.35	181.1	163.52	32.11	31.22	107.72
scaffold5_19.6	90877	91611	ABC transporter ATP-binding protein	1953	940.16	951.82	965.39	986.9	919.22	569.08	523.22	393.47	112.46	149.8	304.05
scaffold5_19.6	91612	92001	hypothetical protein	1954	975.37	892.5	982.01	881.77	871.62	735.86	629.92	349.26	0	0	252.17
scaffold5_19.6	92235	93644	2-oxo acid dehydrogenase subunit E2	1955	376.31	420.96	392.75	502.78	575.44	171.39	190.59	348.01	52.27	54.57	635.1
scaffold5_19.6	93677	94681	alpha-ketoacid dehydrogenase subunit beta	1956	303.61	386.59	329.07	445.29	522.67	210.72	203.67	348.14	532.23	459.96	531.04
scaffold5_19.6	94681	95736	pyruvate dehydrogenase (acetyl-transferring) E1 component subunit alpha	1957	239.98	265.37	243.88	318.4	397.95	88.85	88.68	278.86	626.55	632.27	527.53
scaffold5_19.6	96015	97385	protoporphyrinogen oxidase	1958	221.49	251.21	231.96	236.53	238.26	118.04	115.26	165.01	584.91	443.19	84.42
scaffold5_19.6	97385	98665	TIGR04053 family radical SAM/SPASM domain-containing protein	1959	278.74	273.62	294.22	257.64	250.27	196.93	199.14	141.53	522.2	338.52	111.51
scaffold5_19.6	98987	100021	bifunctional metallophosphatase/5'-nucleotidase	1960	211.91	289.54	255.4	309.1	289.18	626.69	563.09	526.4	442.91	325.01	342.38
scaffold5_19.6	100055	100390	5'-nucleotidase C-terminal domain-containing protein	1961	947.34	1434.57	1110.77	1413.01	1387.48	4823.18	5004.04	4089.09	279.54	174.41	3005.41
scaffold5_19.6	100318	101049	5'-nucleotidase C-terminal domain-containing protein	1962	166.68	200.64	171.68	294.35	365.79	734.98	894.87	624.81	338.52	257.6	488.88
scaffold5_19.6	101263	101511	ABC transporter ATP-binding protein	1963	83.03	70.96	86.88	99.53	76.34	473.98	408.37	197.91	541.82	536.61	144.7
scaffold5_19.6	101755	102030	ABC transporter ATP-binding protein	1964	28.78	32.81	25.61	31.93	18.18	65.39	51.27	84.03	130.44	187.63	22.62
scaffold5_19.6	102307	102603	hypothetical protein	1965	55.15	48.46	59.09	63.67	40.88	20.68	21.08	70.78	96.49	143.59	11.41
scaffold5_19.6	102600	103022	WYL domain-containing protein	1966	120.27	125.18	125.09	140.12	114.77	65.89	57.85	239.35	352.12	527.53	98.01
scaffold5_19.6	102956	103285	HTH domain-containing protein	1967	236.22	199.06	231.7	191.92	139.91	80.05	85.86	362	605.54	894.37	91.86
scaffold5_19.6	103351	103590	hypothetical protein	1968	376.89	372.88	380.83	431.96	285.09	78.52	75.98	489.03	786.27	1112.51	120.15
scaffold5_19.6	103757	104074	transposase	1969	1072.12	1111.08	1121.33	1435.18	1108.11	155.05	208.34	1797.09	885.7	1202.38	993.66
scaffold5_19.6	104252	105271	triacylglycerol lipase	1970	3707.59	3592.78	3692.95	3589.32	3277.21	1180.95	1276.2	3242.86	985.85	1161.96	1727.88
scaffold5_19.6	105866	107368	cellulase family glycosylhydrolase	1971	3113.89	2319.98	3065.9	3516.86	2967.7	1168.75	1405.85	1421.87	874.4	1031.37	1249.38
scaffold5_19.6	107736	108173	hypothetical protein	1972	49.21	55.97	52.42	68.11	65.63	80.21	80.8	116.73	166.54	222.49	150.89
scaffold5_19.6	108443	109257	CAMP factor family pore-forming toxin	1973	91.35	65.11	88.57	205.88	145.77	107.41	109.63	142.58	389.89	301.71	104.59
scaffold5_19.6	109414	109701	hypothetical protein	1974	166.07	129.5	169.08	171.86	148.55	69.39	59.21	74.66	100.57	85.67	20.54
scaffold5_19.6	109738	109944	hypothetical protein	1975	20.58	16.39	15.31	35.9	31.76	17.95	16.59	78.34	24.15	9.75	5.25
scaffold5_19.6	109958	110434	low molecular weight phosphotyrosine protein phosphatase	1976	64.76	45.48	68.73	96.36	101.74	61.64	72.63	110.95	68.29	51.46	23.91
scaffold5_19.6	110498	111538	cyanophycinase	1977	693.11	762.52	722.06	802.91	910.62	396.88	397.07	253.02	165.84	171.76	190.51
scaffold5_19.6	111535	112233	response regulator transcription factor	1978	361.63	411.91	394.95	464.66	500.34	189.43	216.33	173.51	417.46	376.04	44.8
scaffold5_19.6	112284	113660	HAMP domain-containing histidine kinase	1979	268.2	377.71	311.01	302.06	296.69	190.09	187.26	215.3	185.5	194.34	117.36
scaffold5_19.6	113813	114727	isoaspartyl peptidase/L-asparaginase	1980	255.64	319.1	278.86	320.49	351.11	161.84	151.75	342.47	642.13	513.28	569.75
scaffold5_19.6	114734	115333	isopentenyl-diphosphate Delta-isomerase	1981	125.38	139.39	132.08	173.66	203.37	209.62	211.01	510.34	796.47	770.12	499.88
scaffold5_19.6	115467	116660	MarP family serine protease	1982	117.07	131.59	121.73	127.2	137.09	117.16	124.32	144.85	251.8	261.91	69.04
scaffold5_19.6	116793	117152	hypothetical protein	1983	233.16	259.36	229.03	230.52	257.34	104.39	109.93	127.21	211.03	166.83	41.96
scaffold5_19.6	117205	118305	NADH:flavin oxidoreductase/NADH oxidase	1984	496.35	526.01	465.58	473.26	504.93	154.22	146.05	220.12	452.5	461.8	303.36
scaffold5_19.6	118381	118605	hypothetical protein	1985	197.68	228.97	218.16	186.62	202.64	459.87	384.76	153.86	573.78	638.61	179.78
scaffold5_19.6	118612	119844	MFS transporter	1986	37.59	51.44	43.15	44.99	46	55.03	53.16	57.39	96.71	124.76	27.57
scaffold5_19.6	120294	122864	ribonucleoside-diphosphate reductase subunit alpha	1987	32.74	40.18	30.87	46.07	43.65	93.18	80.99	176.19	209.94	281.95	156.74
scaffold5_19.6	122899	123885	ribonucleotide-diphosphate reductase subunit beta	1988	32.61	51.91	36.47	36.51	35.83	150.9	142.22	173.03	190.42	188	75.87
scaffold5_19.6	124073	124345	hypothetical protein	1989	14.26	21.1	18.71	33.34	29.15	40.26	40.2	204.96	219.59	179.95	40.58
scaffold5_19.6	124283	124495	hypothetical protein	1990	8.02	8.46	5.44	25.38	12.5	22.66	26.58	127.03	207.04	175.61	19.25
scaffold5_19.6	124410	124604	hypothetical protein	1991	6.31	8.77	8.98	18.2	14.73	14.66	18.81	38.16	122.6	114.62	8.02
scaffold5_19.6	124655	125737	ROK family protein	1992	64.04	62.66	63.4	89.05	89.1	62.04	58.21	176.97	379.37	360.19	179.77
scaffold5_19.6	125911	126522	hypothetical protein	1993	73.92	60.46	82.27	73.16	57.91	144.25	126.04	129.98	617.21	629.2	119.07
scaffold5_19.6	126573	126698	type B 50S ribosomal protein L36	1994	30.08	29.33	28.84	20.22	35.93	472.18	448.86	200.98	373.89	288.68	526.65
scaffold5_19.6	126894	127040	ornithine carbamoyltransferase	1995	24.33	50.27	30.33	24.66	48.45	76.59	75.75	75	172.59	138.93	34.23
scaffold5_19.6	127713	128899	adhesin	1996	230.77	271.52	214.85	282.1	331.96	270.7	208.25	1059.52	791.95	853.44	1044.92
scaffold5_19.6	129164	130912	arginine--tRNA ligase	1997	590.68	699.27	675.62	799.91	765.52	739.15	677.55	524.88	737.08	726.36	638.04
scaffold5_19.6	130969	131790	aldo/keto reductase	1998	898.11	787.28	1182.83	2009.48	2546.02	4763.46	5108.28	2971.83	568.59	628.08	1693.57
scaffold5_19.6	131857	132492	YdcF family protein	1999	679.08	838.95	630.74	611.61	636.33	1078.32	1065.62	823.45	586.35	655.07	825.29
scaffold5_19.6	133032	134714	glucose-6-phosphate isomerase	2000	223.7	315.14	249.21	268.94	265.25	384.6	396.88	419.61	480.12	411.68	239.71
scaffold5_19.6	134963	135808	hypothetical protein	2001	100.81	87.39	102.93	128.22	134.61	68.92	71.76	317.33	394.88	351.28	221.2
scaffold5_19.6	135833	136498	bifunctional 4-hydroxy-2-oxoglutarate aldolase/2-dehydro-3-deoxy-phosphogluconate aldolase	2002	117.03	163.65	131.79	164.89	169.48	244.84	210.67	581.95	487.56	497.8	426.2
scaffold5_19.6	136667	137197	DNA starvation/stationary phase protection protein	2003	3561.77	2551.35	3901.72	9050.24	8489.77	15382.1	15378.5	1344.91	999.13	1093.01	872.4
scaffold5_19.6	137352	139943	DUF3516 domain-containing protein	2004	136.08	161.61	169.66	184.35	202.86	966.21	1099.08	210.11	213.64	249.51	264.8
scaffold5_19.6	139958	140473	anaerobic ribonucleoside-triphosphate reductase activating protein	2005	48.63	80.39	65.6	110.65	156.1	193.57	223.7	171.49	602.78	786.68	155.12
scaffold5_19.6	140470	142812	anaerobic ribonucleoside triphosphate reductase	2006	111.66	175.05	138.88	206.73	261.52	176.82	167.59	140.55	484.08	530.73	115.33
scaffold5_19.6	143268	143729	YbhB/YbcL family Raf kinase inhibitor-like protein	2007	1171.47	729.7	1091.45	1041.32	903.98	559.25	646.93	100.72	513.74	425.95	31.26
scaffold5_19.6	143962	145026	cutinase family protein	2008	137.29	182.41	146.37	175.7	190.34	104.15	114.55	147.05	393.77	396.12	95.84
scaffold5_19.6	145032	145730	hypothetical protein	2009	127.27	164.99	134.19	153.36	152.69	84.34	80.9	193.62	388.57	406.37	145.42
scaffold5_19.6	146232	146825	hypothetical protein	2011	533.63	458.6	563.98	931.23	747.98	723.17	697.28	314.44	1311.73	1566.64	269.11
scaffold5_19.6	147302	148225	lysophospholipase	2012	1216.72	961.69	1139.67	1462.08	1158.37	325.44	320.18	107.92	582.24	489.1	71.98
scaffold5_19.6	148415	149908	polysaccharide deacetylase family protein	2013	537.26	544.49	550.12	297.81	314.06	133.7	122.74	97.79	562.07	342.06	46.26
scaffold5_19.6	149905	150764	TIGR03943 family protein	2014	387.09	478.69	398.83	278.49	286.18	169.53	158.33	713.41	817.62	915.09	870.69
scaffold5_19.6	150761	151684	permease	2015	92.67	123.08	94.78	86.85	77.65	62.58	61.96	197.96	354.69	261.83	156.75
scaffold5_19.6	151918	152097	hypothetical protein	2016	1954.22	1645.46	1748.27	2717.4	2825.96	529.91	618.98	118.87	399.63	346.26	40.22
scaffold5_19.6	152159	153397	polysaccharide deacetylase family protein	2017	1061.17	943.33	1020.72	1291.35	1484.49	744.48	714.8	128.91	504.63	490.43	88.73
scaffold5_19.6	153417	155294	murein biosynthesis integral membrane protein MurJ	2018	188.21	262.72	211.01	208.12	191.89	276.14	265.49	252.97	515.65	571.86	394.08
scaffold5_19.6	155251	156525	aspartate kinase	2019	298.31	367.27	329.42	355.25	345.79	435.44	431.93	334.31	782.3	841.64	568.24
scaffold5_19.6	156713	159235	penicillin-binding protein	2020	743.64	996.06	753.42	669.9	797.51	1141.99	1109.38	731.26	912.33	964.63	649.56
scaffold5_19.6	159237	160151	metallophosphoesterase	2021	277.35	363.96	282.86	235.54	241.42	500.54	502.42	354.56	648.73	635.9	272.08
scaffold5_19.6	160519	161058	type 1 glutamine amidotransferase	2023	1647.83	1333.24	1981.24	3337.05	3995.67	5741.06	6327.24	3802.26	882.74	1031.06	3017.4
scaffold5_19.6	161358	163025	ABC transporter substrate-binding protein	2024	64.08	66.27	73.52	62.34	74.13	421.31	373.96	79.4	296.85	315.22	34.74
scaffold5_19.6	163098	164021	ABC transporter permease	2025	29.86	38.62	32.26	35.54	24.08	209.43	174.42	64.29	151.38	190.11	21.99
scaffold5_19.6	164068	164985	ABC transporter permease	2026	96.91	98.31	97.57	134.75	102.12	161.06	142.27	167.7	293.4	329.41	160.71
scaffold5_19.6	165031	166034	ABC transporter ATP-binding protein	2027	20.02	24.23	20.98	33.31	31.44	65.87	59.07	85.64	159.44	196.92	34.99
scaffold5_19.6	166024	167085	dipeptide ABC transporter ATP-binding protein	2028	17.51	22.21	17.95	32.48	29.36	76.56	72.65	94.98	221.53	260.91	64.72
scaffold5_19.6	167313	167558	type B 50S ribosomal protein L31	2029	101.7	95.06	97.24	116.72	107.54	278.27	235.9	197.3	166.43	175.98	52.64
scaffold5_19.6	167655	167891	50S ribosomal protein L28	2030	7.96	7.27	2.83	10.71	6.15	69.35	68.86	51.16	5.57	10.05	2.23
scaffold5_19.6	167891	168061	50S ribosomal protein L33	2031	6.18	7.6	8.49	9.07	4.96	68.06	43.72	50.74	28.07	11.69	3.22
scaffold5_19.6	168061	168366	30S ribosomal protein S14	2032	14.61	18.86	17.6	22.01	26	135.06	124.51	78.58	168.15	189.89	25.2
scaffold5_19.6	168371	168541	50S ribosomal protein L32	2033	43.68	56.05	52.99	75.08	59.62	205.76	208.73	132.08	347.68	405.11	78.1
scaffold5_19.6	168619	168984	FKBP-type peptidyl-prolyl cis-trans isomerase	2034	230.25	309.72	244.96	230.83	232.51	973.38	872.67	983.87	884.12	844.42	954.7
scaffold5_19.6	168997	170868	beta-N-acetylglucosaminidase	2035	88.42	106.98	89.89	93.32	102.07	77.68	73.71	351.82	505.12	582.35	300.84
scaffold5_19.6	171105	173132	urocanate hydratase	2036	133.31	116.52	133.43	138.44	134.9	55.06	54.79	91.4	168.74	187.75	60.07
scaffold5_19.6	173132	174328	allantoate amidohydrolase	2037	82.21	85.96	81.33	158.94	178.64	37.64	36.62	127.61	109.71	138.87	149.48
scaffold5_19.6	174325	175665	formimidoylglutamate deiminase	2038	169.97	203.67	174.17	202.28	249.61	50.87	53.66	130.12	103.07	121.05	139.9
scaffold5_19.6	175662	176852	imidazolonepropionase	2039	241.41	306.59	259.52	250.97	306.11	85.93	83.18	139.86	171.31	208.7	219.44
[truncated: 316 more rows]
